# Supplementary material for: Clinical characteristics and outcomes of hospitalized patients with SARS-CoV-2 infection in a Latin American country: Results from the ECCOVID multicenter prospective study
Source: PLoS One. 2021 Oct 8;16(10):e0258260. doi: 10.1371/journal.pone.0258260 (PMC8500444; doi:10.1371/journal.pone.0258260)
Supplement: S1 Data — (XLSX) [file pone.0258260.s001.xlsx]

## Sheet: ECCOVID
record_id	redcap_data_access_group	id_centros	demo_hospital	demo_edadpreval	demo_fechnacprimeval	demo_tipoatencinic	demo_intern_fecha	demo_intern_lugar	f1_sexobiol	f1_raza	f1_peso	f1_peso_esp	f1_talla	f1_talla_esp	f1_educ	f1_hogar_canthab	f1_hogar_obrsoc	f1_hogar_prep	f2_adq_opc	adquisicion_complete	f3_hipert	f3_diabet	f3_insufcard	f3_enfcoron	f3_enfvasc	f3_acv	f3_demenc	f3_epoc	f3_enfpept	f3_enfhep	f3_cirros	f3_obes	f3_neopconmet	f3_neopsinmet	f3_linfoma	f3_leucem	f3_asma	f3_tabaqactual	f3_tabaqprevio	f3_hiv	f3_alcohol	f3_transporgano	f3_transpmedula	f3_enfermautoinm	f3_inmunos	f3_insufrenal	f3_embarazo	f3_hiv_cd4	comorbilidades_complete
1-1	cemic		CEMIC, CABA, Buenos Aires	31	21996	Internado	21996	Sala	Masc.	A. Blanca	80	Estimado	185	Estimado	Nivel Secundario	4	Si	No	Conglomerado	Complete	No	No	No	No	No	No	No	No	No	No	No	No	No	No	No	No	No	No	No	No	No	No	No	No	No	No	No		Complete
1-2	cemic		CEMIC, CABA, Buenos Aires	26	21997	Internado	21997	Sala	Fem.	A. Blanca	65	Medido	156	Estimado	Nivel Universitario completo	6	No	Si	Caso importado	Complete	No	No	No	No	No	No	No	No	No	No	No	No	No	No	No	No	No	No	No	No	No	No	No	No	No	No	No		Complete
1-9	cemic		CEMIC, CABA, Buenos Aires	54	22004	Internado	22004	Sala	Masc.	A. Blanca	102	Medido	185	Medido	Nivel Universitario completo	4		Si	Comunitario(sin nexo epidemiol√≥gico)	Complete	No	No	No	No	No	No	No	No	No	No	No	No	No	No	No	No	No	No	No	No	No	No	No	No	No	No	No		Complete
1-11	cemic		CEMIC, CABA, Buenos Aires	49	22015	Internado	22015	Sala	Masc.	D. Pueblo originario	76	Medido	157	Medido	Nivel Universitario completo	5		Si	Personal salud	Complete	No	No	No	No	No	No	No	No	No	No	No	No	No	No	No	No	No	No	No	No	No	No	No	No	No	No	No		Complete
1-15	cemic		CEMIC, CABA, Buenos Aires	23	22050	Internado	22050	Sala	Fem.	A. Blanca	52	Medido	150	Estimado	Nivel Terciario	1	No	Si	Comunitario(sin nexo epidemiol√≥gico)	Complete	No	No	No	No	No	No	No	No	No	No	No	No	No	No	No	No	No	No	No	No	No	No	No	No	No	No	No		Complete
1-19	cemic		CEMIC, CABA, Buenos Aires	36	22056	Internado	22056	Sala	Fem.	A. Blanca	67	Medido	164	Medido	Nivel Secundario	8	Si	No	Conglomerado	Complete	No	No	No	No	No	No	No	No	No	No	No	No	No	No	No	No	No	Si	No	No	No	No	No	No	No	No	No		Complete
1-20	cemic		CEMIC, CABA, Buenos Aires	82	22055	Internado	22055	Terapia	Fem.	A. Blanca	60	Estimado	160	Estimado	Nivel Secundario	2	Si		Contacto estrecho	Complete	Si	No	No	No	No	No	No	No	No	No	No	No	No	No	No	No	No	No	No	No	No	No	No	No	No	No	No		Complete
1-21	cemic		CEMIC, CABA, Buenos Aires	24	22060	Internado	22060	Sala	Fem.	A. Blanca	59.8	Medido	161	Medido	Nivel Terciario	0		Si	Personal salud	Complete	No	No	No	No	No	No	No	No	No	No	No	No	No	No	No	No	No	No	No	No	No	No	No	No	No	No	Si		Complete
1-24	cemic		CEMIC, CABA, Buenos Aires	73	22058	Internado	22058	Sala	Fem.	A. Blanca	50	Medido	154	Medido	Nivel Terciario	0		Si	Comunitario(sin nexo epidemiol√≥gico)	Complete	Si	No	No	Si	No	No	No	Si	No	No	No	No	No	No	No	No	No	No	Si	No	No	No	No	No	No	No	No		Complete
1-31	cemic		CEMIC, CABA, Buenos Aires	39	22065	Internado	22096	Sala	Fem.	A. Blanca	57	Medido	165	Estimado	Nivel Terciario	0	Si		Personal salud	Complete	No	No	No	No	No	No	No	No	No	No	No	No	No	No	No	No	No	No	No	No	No	No	No	No	No	No	No		Complete
1-33	cemic		CEMIC, CABA, Buenos Aires	35	22067	Internado	22067	Sala	Fem.	A. Blanca	66	Medido	166	Medido	Nivel Terciario	3	Si	No	Comunitario(sin nexo epidemiol√≥gico)	Complete	No	No	No	No	No	No	No	No	No	No	No	No	No	No	No	No	No	No	No	No	No	No	No	No	No	No	No		Complete
1-35	cemic		CEMIC, CABA, Buenos Aires	66	22068	Internado	22068	Sala	Fem.	A. Blanca	56	Estimado	160	Estimado	Nivel Secundario	1	No	Si	Contacto estrecho	Complete	No	No	No	No	No	No	Si	No	No	No	No	No	No	No	No	No	No	No	No	No	No	No	No	No	No	No	No		Complete
1-36	cemic		CEMIC, CABA, Buenos Aires	95	22069	Internado	22069	Sala	Fem.	A. Blanca	50	Estimado	150	Estimado	Nivel Secundario	1	No	Si	Conglomerado	Complete	Si	No	Si	No	No	No	No	No	No	No	No	No	No	No	No	No	No	No	Si	No	No	No	No	No	No	No	No		Complete
1-37	cemic		CEMIC, CABA, Buenos Aires	25	22070	Internado	22070	Sala	Masc.	D. Pueblo originario	82	Medido	170	Medido	Nivel Terciario	2	Si	No	Personal salud	Complete	No	No	No	No	No	No	No	No	No	No	No	No	No	No	No	No	No	No	No	No	No	No	No	No	No	No	No		Complete
1-38	cemic		CEMIC, CABA, Buenos Aires	31	22067	Internado	22067	Sala	Fem.	A. Blanca	55	Medido	160	Medido	Nivel Terciario	2	Si	No	Contacto estrecho	Complete	No	No	No	No	No	No	No	No	No	No	No	No	No	No	No	No	No	No	No	No	No	No	No	No	No	No	No		Complete
1-39	cemic		CEMIC, CABA, Buenos Aires	31	22072	Internado	22072	Sala	Masc.	A. Blanca	102	Medido	175	Medido	Nivel Universitario completo	1	No	Si	Personal salud	Complete	No	No	No	No	No	No	No	No	No	No	No	Si	No	No	No	No	No	No	No	No	No	No	No	No	No	No	No		Complete
1-40	cemic		CEMIC, CABA, Buenos Aires	86	22075	Internado	22075	Sala	Fem.	A. Blanca	70	Estimado	150	Estimado	Nivel Universitario completo	2	No	Si	Conglomerado	Complete	No	No	No	No	No	No	Si	No	No	No	No	Si	No	No	No	No	No	No	No	No	No	No	No	No	No	No	No		Complete
1-41	cemic		CEMIC, CABA, Buenos Aires	68	22074	Internado	22074	Sala	Masc.	A. Blanca	71	Medido	170	Medido	Nivel Universitario completo	1	Si	No	Comunitario(sin nexo epidemiol√≥gico)	Complete	No	No	No	No	No	No	No	No	No	No	No	No	Si	No	No	No	No	No	No	No	No	No	No	No	Si	No	No		Complete
1-42	cemic		CEMIC, CABA, Buenos Aires	96	22074	Internado	22074	Sala	Fem.	A. Blanca	70	Estimado	155	Estimado	Nivel Primario	0	No	Si	Conglomerado	Complete	Si	Si	No	No	No	No	Si	No	No	No	No	No	No	No	No	No	No	No	No	No	No	No	No	No	No	No	No		Complete
1-43	cemic		CEMIC, CABA, Buenos Aires	69	22074	Internado	22072	Sala	Fem.	A. Blanca	92	Medido	163	Medido	Nivel Terciario	2	Si	No	Comunitario(sin nexo epidemiol√≥gico)	Complete	Si	No	No	No	No	No	No	No	No	No	No	Si	No	No	No	No	Si	No	No	No	No	No	No	No	No	No	No		Complete
1-45	cemic		CEMIC, CABA, Buenos Aires	62	22078	Internado	22078	Sala	Masc.	A. Blanca	77	Medido	175	Medido	Nivel Secundario	6	Si	No	Personal salud	Complete	No	No	No	No	No	No	No	No	No	No	No	No	No	No	No	No	No	No	No	No	No	No	No	No	No	No	No		Complete
1-46	cemic		CEMIC, CABA, Buenos Aires	58	22084	Internado	22084	Sala	Masc.	A. Blanca	84	Medido	174	Medido	Nivel Universitario completo	2	No	Si	Comunitario(sin nexo epidemiol√≥gico)	Complete	Si	No	No	No	No	No	No	No	No	No	No	No	No	No	No	No	No	No	Si	No	No	No	No	No	No	No	No		Complete
1-47	cemic		CEMIC, CABA, Buenos Aires	54	22083	Internado	22083	Sala	Fem.	A. Blanca	98	Medido	169	Medido	Nivel Universitario completo	5	No	Si	Comunitario(sin nexo epidemiol√≥gico)	Complete	Si	No	No	No	No	No	No	No	No	No	No	Si	No	No	No	No	No	No	No	No	No	No	No	No	No	No	No		Complete
1-48	cemic		CEMIC, CABA, Buenos Aires	43	22084	Internado	22084	Sala	Masc.	A. Blanca	112	Medido	182	Medido	Nivel Secundario	2	No	Si	Personal salud	Complete	No	No	No	No	No	No	No	No	No	No	No	Si	No	No	No	No	No	No	Si	No	No	No	No	No	No	No	No		Complete
1-50	cemic		CEMIC, CABA, Buenos Aires	44	22084	Internado	22084	Sala	Fem.	A. Blanca	57	Medido	162	Medido	Nivel Terciario	1	No	Si	Comunitario(sin nexo epidemiol√≥gico)	Complete	No	No	No	No	No	No	No	No	No	No	No	No	No	No	No	No	No	No	Si	No	No	Si	No	No	Si	No	No		Complete
1-51	cemic		CEMIC, CABA, Buenos Aires	41	22119	Internado	22119	Sala	Masc.	A. Blanca	47	Medido	150	Medido	Nivel Universitario incompleto	3	Si	No	Comunitario(sin nexo epidemiol√≥gico)	Complete	Si	No	No	No	No	No	No	No	No	No	No	No	No	No	No	No	No	No	Si	No	No	Si	No	No	Si	Si	No		Complete
1-52	cemic		CEMIC, CABA, Buenos Aires	72	22123	Internado	22123	Sala	Fem.	A. Blanca	70	Estimado	160	Estimado	Nivel Universitario completo	0	Si	No	Comunitario(sin nexo epidemiol√≥gico)	Complete	No	No	No	No	No	No	No	No	No	No	No	No	Si	No	No	No	Si	No	Si	No	No	No	No	No	No	No	No		Complete
1-53	cemic		CEMIC, CABA	62	22127	Internado	22127	Terapia	Fem.	A. Blanca	64	Medido	155	Medido	Nivel Terciario	3	Si	No	Personal salud	Complete	No	No	No	No	No	No	No	No	Si	Si	No	No	No	No	No	No	Si	No	Si	No	No	No	No	No	No	No	No		Complete
1-54	cemic		cemic , caba	28	22131	Internado	22131	Sala	Masc.	A. Blanca	80	Estimado	180	Estimado	Nivel Secundario	2	Si	No	Comunitario(sin nexo epidemiol√≥gico)	Complete	No	No	No	No	No	No	No	No	No	No	No	No	No	No	No	No	No	No	No	No	No	No	No	No	No	No	No		Complete
1-55	cemic		cemic caba	78	22127	Internado	22127	Sala	Fem.	A. Blanca	70	Estimado	160	Estimado	Nivel Terciario	0	Si	No	Conglomerado	Complete	No	No	No	No	No	No	Si	No	No	No	No	No	No	No	No	No	No	No	No	No	No	No	No	No	No	No	No		Complete
1-56	cemic		cemic caba	64	22124	Ambulatorio		Sala	Fem.	A. Blanca	103	Medido	160	Estimado	Nivel Universitario completo	1	Si	No	Contacto estrecho	Complete	Si	No	No	No	No	No	No	No	No	No	No	Si	No	No	No	No	No	No	No	No	No	Si	No	No	Si	Si	No		Complete
1-57	cemic		cemic caba	54	22126	Internado	22127	Sala	Masc.	A. Blanca	85	Medido	170	Estimado	Nivel Primario	5	Si		Comunitario(sin nexo epidemiol√≥gico)	Complete	Si	Si	No	No	No	No	No	No	No	No	No	Si	No	No	No	No	No	No	No	No	No	Si	No	No	Si	Si	No		Complete
1-58	cemic		cemic caba	62	22132	Internado		Sala	Fem.	A. Blanca	55	Medido	160	Medido	Nivel Secundario	0	Si		Comunitario(sin nexo epidemiol√≥gico)	Complete	Si	No	Si	No	No	No	No	No	No	No	No	No	No	Si	No	No	No	No	Si	No	No	No	No	No	No	No	No		Complete
1-61	cemic		CEMIC, CABA, Buenos Aires	49	22131	Ambulatorio		Sala	Masc.	A. Blanca	68	Medido	168	Medido	Nivel Universitario completo	2	No	Si	Comunitario(sin nexo epidemiol√≥gico)	Complete	Si	No	No	No	No	No	No	No	No	No	No	No	Si	No	No	No	No	No	Si	No	No	No	No	No	No	No	No		Complete
1-62	cemic		CEMIC, CABA	77	22136	Internado	22136	Guardia	Masc.	A. Blanca	75	Medido	167	Medido	Nivel Terciario	2	No	Si	Comunitario(sin nexo epidemiol√≥gico)	Complete	Si	Si	No	No	No	No	No	No	No	No	No	Si	No	Si	No	No	No	No	No	No	No	No	No	No	Si	Si	No		Complete
1-63	cemic		CEMIC, CABA	68	22128	Internado	22128	Guardia	Fem.	A. Blanca	70	Estimado	166	Estimado	Nivel Secundario	0	Si	No	Comunitario(sin nexo epidemiol√≥gico)	Complete	No	Si	No	No	No	No	No	No	No	No	Si	No	No	No	No	No	No	No	No	No	No	No	No	No	No	No	No		Complete
1-64	cemic		Cemic, CABA, Buenos Aires	69	22127	Internado	22127	Sala	Masc.	A. Blanca	70	Estimado	170	Estimado	Nivel Universitario completo	3	No	Si	Contacto estrecho	Complete	No	Si	No	Si	No	No	No	No	Si	No	No	No	No	No	No	No	No	No	No	No	No	No	No	No	No	No	No		Complete
1-65	cemic		CEMIC, Caba, Buenos Aires	81	22103	Ambulatorio		Sala	Fem.	A. Blanca	100	Estimado	160	Estimado	Nivel Terciario	2	No	Si	Conglomerado	Complete	Si	No	No	No	No	No	Si	No	No	No	No	Si	No	No	No	No	No	No	No	No	No	No	No	No	No	No	No		Complete
1-66	cemic		CEMIC, Caba, Buenos Aires	66	22099	Ambulatorio		Sala	Fem.	A. Blanca	62	Estimado	159	Estimado	Nivel Terciario	2	No	Si	Contacto estrecho	Complete	No	Si	No	No	No	No	No	No	Si	No	No	No	No	No	No	No	No	No	Si	No	No	No	No	No	No	No	No		Complete
1-67	cemic		CEMIC, CABA, Buenos Aires	48	22104	Ambulatorio		Sala	Fem.	A. Blanca	80	Estimado	155	Estimado	Nivel Secundario	3	No	Si	Contacto estrecho	Complete	No	No	No	No	No	No	No	No	No	No	No	No	No	No	No	No	Si	No	No	No	No	No	No	No	No	No	No		Complete
1-68	cemic		CEMIC, CABA	51	22076	Internado	22118	Guardia	Masc.	A. Blanca	50	Estimado	160	Estimado	Nivel Secundario	4	Si	No	Conglomerado	Complete	No	No	No	No	No	No	No	No	No	No	Si	No	No	No	No	No	No	No	Si	Si	No	Si	No	No	Si	Si	No	159	Complete
1-69	cemic		CEMIC, CABA, Buenos Aires	64	22132	Ambulatorio		Sala	Fem.	A. Blanca	62	Estimado	158	Estimado	Nivel Universitario completo	1	Si	No	Conglomerado	Complete	No	No	No	No	No	No	No	No	No	No	No	No	No	No	No	No	No	No	Si	No	No	No	No	No	No	No	No		Complete
1-70	cemic		CEMIC, CABA	62	22106	Internado	22106	Terapia	Masc.	A. Blanca	74	Estimado	163	Estimado	Nivel Universitario completo	1	Si	No	Personal salud	Complete	Si	No	No	No	No	No	No	No	No	No	No	No	No	No	No	No	No	No	Si	No	No	No	No	No	No	No	No		Complete
1-71	cemic		CEMIC, CABA	33	22124	Ambulatorio		Sala	Masc.	A. Blanca	145	Estimado	180	Estimado	Nivel Secundario	4	Si	No	Contacto estrecho	Complete	No	No	No	No	No	No	No	No	No	No	No	Si	No	No	No	No	No	No	No	No	No	No	No	No	No	No	No		Complete
1-72	cemic		Cemic, caba	32	22107	Internado	22107	Terapia	Masc.	A. Blanca	98	Medido	172	Medido	Nivel Universitario completo	1	No	Si	Personal salud	Complete	No	No	No	No	No	No	No	No	No	No	No	Si	No	No	No	No	No	No	No	No	No	No	No	No	No	No	No		Complete
1-73	cemic		CEMIC, CABA, Buenos Aires	44	22103	Ambulatorio		Sala	Fem.	A. Blanca	60	Estimado	170	Estimado	Nivel Terciario	1	No	Si	Contacto estrecho	Complete	No	No	No	No	No	No	No	No	No	No	No	No	No	No	No	No	No	No	No	No	No	No	No	No	No	No	No		Complete
1-74	cemic		CEMIC, CABA, Buenos Aires	29	22095	Ambulatorio		Sala	Fem.	A. Blanca	63	Medido	160	Medido	Nivel Universitario completo	0	No	Si	Personal salud	Complete	No	No	No	No	No	No	No	No	No	No	No	No	No	No	No	No	No	No	No	No	No	No	No	No	No	No	No		Complete
1-75	cemic		CEMIC, CABA, Buenos Aires	80	22104	Ambulatorio		Sala	Fem.	A. Blanca	90	Estimado	170	Estimado	Nivel Secundario	0	No	Si	Contacto estrecho	Complete	Si	No	No	No	Si	No	No	Si	No	No	No	No	Si	No	No	No	No	No	Si	No	No	No	No	No	No	No	No		Complete
1-76	cemic		CEMIC, CABA, Buenos Aires	86	22092	Ambulatorio		Sala	Masc.	A. Blanca	78	Estimado	170	Estimado	Nivel Universitario completo	1	No	Si	Comunitario(sin nexo epidemiol√≥gico)	Complete	No	No	No	Si	No	No	No	No	No	No	No	No	Si	No	No	No	No	No	No	No	No	No	No	Si	No	No	No		Complete
1-77	cemic		CEMIC, CABA	75	22100	Ambulatorio		Sala	Masc.	A. Blanca	75	Estimado	168	Estimado	Nivel Secundario	1	No	Si	Comunitario(sin nexo epidemiol√≥gico)	Complete	Si	No	No	No	No	No	No	No	No	No	No	No	No	No	No	No	No	No	No	No	No	No	No	No	No	No	No		Complete
1-78	cemic		CEMIC, CABA	34	22123	Ambulatorio		Sala	Masc.	A. Blanca	96	Estimado	180	Estimado	Nivel Universitario completo	0	No	Si	Comunitario(sin nexo epidemiol√≥gico)	Complete	No	No	No	No	No	No	No	No	No	No	No	Si	No	No	No	No	No	No	No	No	No	No	No	No	No	No	No		Complete
1-79	cemic		CEMIC, CABA	33	22134	Ambulatorio		Sala	Fem.	A. Blanca	82	Medido	1.58	Medido	Nivel Secundario	2	Si	No	Comunitario(sin nexo epidemiol√≥gico)	Complete	No	No	No	No	No	No	No	No	No	No	No	No	No	No	No	No	No	No	No	No	No	No	No	No	No	No	No		Complete
1-80	cemic		CEMIC, CABA	57	22110	Internado	22110	Sala	Masc.	A. Blanca	75	Estimado	166	Estimado	Nivel Universitario completo	4	No	Si	Personal salud	Complete	No	No	No	No	No	No	No	No	No	No	No	Si	No	No	No	No	No	No	No	No	No	No	No	No	No	No	No		Complete
1-81	cemic		CEMIC, CABA, Buenos Aires	22	22112	Internado	22078	Guardia	Masc.	A. Blanca	70	Estimado	1.68	Estimado	Nivel Secundario		Si	No	Personal salud	Complete	No	No	No	No	No	No	No	No	No	No	No	No	No	No	No	No	No	No	No	No	No	No	No	No	No	No	No		Complete
1-82	cemic		CEMIC, CABA, Buenos Aires	97	22122	Internado	22122	Guardia	Fem.	A. Blanca	60	Estimado	1.6	Estimado			Si		Conglomerado	Complete	Si	Si	Si	No	No	No	Si	No	No	No	No	No	No	No	No	No	No	No	No	No	No	No	No	No	No	No	No		Complete
1-84	cemic		CEMIC CABA	76	22085	Internado	22085	Sala	Fem.	A. Blanca	50	Estimado	160	Estimado	Nivel Secundario	0	No	Si	Comunitario(sin nexo epidemiol√≥gico)	Complete	Si	Si	No	No	No	No	No	No	No	No	No	No	No	No	Si	No	No	No	Si	No	No	No	No	No	No	No	No		Complete
1-85	cemic		CEMIC, CABA, Buenos Aires	76	22095	Internado	22095	Sala	Fem.	A. Blanca	70	Estimado	156	Estimado	Nivel Universitario completo	3	No	Si	Conglomerado	Complete	Si	No	No	No	No	No	No	No	No	No	No	Si	No	No	No	No	No	No	No	No	No	No	No	No	No	No	No		Complete
1-86	cemic		CEMIC, CABA, Buenos Aires	87	22078	Internado	22078	Terapia	Fem.	A. Blanca			158	Estimado	Nivel Terciario	1	No	Si	Comunitario(sin nexo epidemiol√≥gico)	Complete	No	No	No	No	No	Si	Si	No	No	No	No	No	No	No	No	No	No	No	Si	No	No	No	No	No	No	No	No		Complete
1-88	cemic		CEMIC, CABA, Buenos Aires	37	22098	Internado	22103	Sala	Masc.	A. Blanca	100	Estimado	175	Estimado	Nivel Universitario completo	5	Si		Contacto estrecho	Complete	No	No	No	No	No	No	No	No	No	No	No	Si	No	No	No	No	No	No	No	No	No	No	No	No	No	No	No		Complete
1-89	cemic		Cemic caba	95	22120	Internado	22121	Sala	Masc.	A. Blanca	84	Estimado	178	Estimado	Nivel Primario	2	Si	Si	Comunitario(sin nexo epidemiol√≥gico)	Complete	Si	No	No	No	No	No	No	No	No	No	No	No	No	No	No	No	No	No	Si	No	No	No	No	No	No	No	No		Complete
1-90	cemic		cemic caba	73	22123	Internado	22123	Sala	Masc.	A. Blanca	63	Medido	178	Medido	Nivel Universitario completo	3	Si	Si	Contacto estrecho	Complete	No	No	No	No	No	No	No	No	No	No	No	No	Si	No	No	No	No	No	No	No	No	No	No	No	No	No	No		Complete
1-91	cemic		cemic caba	44	22129	Ambulatorio		Sala	Masc.	A. Blanca	116	Medido	172	Medido	Nivel Universitario completo	3	Si	Si	Contacto estrecho	Complete	No	No	No	Si	No	No	No	No	No	Si	No	Si	No	No	No	No	No	No	Si	No	No	No	No	Si	No	No	No		Complete
1-92	cemic		CEMIC, CABA, Buenos Aires	34	22082	Internado	22082	Sala	Fem.	A. Blanca	67	Estimado	169	Estimado	Nivel Universitario completo	1		Si	Personal salud	Complete	No	No	No	No	No	No	No	No	No	No	No	No	No	No	No	No	No	No	No	No	No	No	No	No	No	No	No		Complete
1-93	cemic		cemic caba	91	22112	Internado	22112	Sala	Masc.	A. Blanca	70	Estimado	173	Estimado	Nivel Primario	2	Si	Si	Contacto estrecho	Complete	No	No	No	No	No	Si	Si	No	No	No	No	No	No	No	No	No	No	No	No	No	No	No	No	No	No	No	No		Complete
1-94	cemic		CEMIC, CABA, Buenos Aires	31	22078	Internado	22078	Sala	Fem.	A. Blanca						1		Si	Comunitario(sin nexo epidemiol√≥gico)	Complete	No	No	No	No	No	No	No	No	No	No	No	No	No	No	No	No	No	No	No	No	No	No	No	No	No	No	No		Complete
1-95	cemic		CEMIC, CABA, Buenos Aires	91	22089	Ambulatorio		Sala	Masc.	A. Blanca	90	Estimado	180	Estimado	Nivel Universitario completo	3	No	Si	Contacto estrecho	Complete	Si	No	No	No	No	Si	No	No	No	No	No	No	Si	No	No	No	No	No	No	No	No	No	No	No	No	No	No		Complete
1-96	cemic		CEMIC, CABA, Buenos Aires	64	22133	Ambulatorio		Sala	Masc.	A. Blanca	67	Estimado	169	Estimado	Nivel Universitario completo	0	No	Si	Personal salud	Complete	No	No	No	No	No	No	No	No	No	No	No	No	No	No	No	No	No	No	No	No	No	No	No	No	No	No	No		Complete
1-97	cemic		CEMIC, CABA, Buenos Aires	60	22098	Internado	22098	Sala	Masc.	B. Negra	71	Estimado	172	Estimado	Nivel Primario	1	Si		Comunitario(sin nexo epidemiol√≥gico)	Complete	No	No	No	No	No	No	No	No	No	No	No	No	No	No	No	No	No	No	No	No	No	Si	No	No	Si	Si	No		Complete
1-98	cemic		CEMIC, CABA, Buenos Aires	48	22089	Ambulatorio		Sala	Fem.	A. Blanca	77	Estimado	160	Estimado	Nivel Universitario completo	3	No	Si	Contacto estrecho	Complete	Si	Si	No	No	No	No	No	No	No	No	No	Si	No	No	No	No	No	No	No	No	No	No	No	No	No	No	No		Complete
1-99	cemic		CEMIC, CABA, Buenos Aires	82	22109	Internado	22117	Sala	Fem.	A. Blanca	87	Estimado	157	Estimado	Nivel Primario	0	No	Si	Contacto estrecho	Complete	Si	No	No	Si	No	No	No	No	No	No	No	Si	No	No	No	No	No	No	No	No	No	No	No	No	No	No	No		Complete
1-100	cemic		CEMIC, CABA, Buenos Aires	79	22099	Ambulatorio		Sala	Fem.	A. Blanca	75	Estimado	150	Estimado	Nivel Universitario completo		No	Si	Conglomerado	Complete	Si	No	No	No	No	No	Si	No	No	No	No	No	Si	No	No	No	No	No	No	No	No	No	No	No	No	No	No		Complete
1-101	cemic		CEMIC, CABA, Buenos Aires	26	22095	Ambulatorio		Sala	Fem.	A. Blanca	64	Estimado	160	Estimado	Nivel Universitario completo	1	No	Si	Personal salud	Complete	No	No	No	No	No	No	No	No	No	No	No	No	No	No	No	No	No	No	No	No	No	No	No	No	No	No	No		Complete
1-102	cemic		CEMIC, CABA, Buenos Aires	72	22099	Internado	22099	Sala	Masc.	A. Blanca	110	Estimado	180	Estimado	Nivel Universitario completo	1	Si		Conglomerado	Complete	No	No	No	No	No	No	Si	No	No	No	No	Si	No	No	No	No	No	No	No	No	No	No	No	No	No	No	No		Complete
1-103	cemic		CEMIC, CABA, Buenos Aires	74	22104	Internado	22104	Sala	Masc.	A. Blanca	60	Medido	170	Medido		1	Si	No	Comunitario(sin nexo epidemiol√≥gico)	Complete	Si	Si	Si	No	No	No	No	No	No	No	No	No	No	Si	No	No	No	No	Si	No	No	No	No	No	No	No	No		Complete
1-104	cemic		CEMIC, CABA, Buenos Aires	74	22112	Internado	22112	Sala	Masc.	A. Blanca	74	Estimado	168	Estimado	Nivel Universitario completo	1		Si	Comunitario(sin nexo epidemiol√≥gico)	Complete	No	No	No	No	No	No	No	No	No	No	No	No	No	No	No	No	No	No	No	No	No	No	No	No	No	No	No		Complete
1-105	cemic		CEMIC, CABA, Buenos Aires	74	22103	Internado	22106	Sala	Masc.	A. Blanca	84	Estimado	186	Estimado	Nivel Universitario completo	3	Si	No	Comunitario(sin nexo epidemiol√≥gico)	Complete	No	No	No	No	No	No	No	No	No	No	No	No	No	No	No	No	No	No	Si	No	No	No	No	No	No	No	No		Complete
1-106	cemic		CEMIC, CABA, Buenos Aires	94	22110	Internado	22110	Sala	Masc.	A. Blanca					Nivel Universitario completo	5		Si	Contacto estrecho	Complete	Si	No	No	No	No	No	Si	No	No	No	No	No	No	No	No	No	No	No	No	No	No	No	No	No	No	Si	No		Complete
1-107	cemic		CEMIC, CABA, Buenos Aires	74	22099	Internado	22099	Sala	Fem.	A. Blanca	65	Estimado	158	Estimado	Nivel Terciario	0	Si		Caso importado	Incomplete	Si	Si	Si	No	No	No	No	No	No	No	No	No	No	Si	No	No	No	No	No	No	No	No	No	No	No	No	No		Complete
1-108	cemic		CEMIC, CABA, Buenos Aires	94	22096	Internado	22096	Sala	Fem.	A. Blanca			160	Estimado	Nivel Secundario	3	Si		Comunitario(sin nexo epidemiol√≥gico)	Complete	No	No	No	No	No	Si	Si	No	No	No	No	No	Si	No	No	No	No	No	No	No	No	No	No	No	No	No	No		Complete
1-109	cemic		CEMIC, CABA, Buenos Aires	82	22103	Internado	22103	Sala	Fem.	A. Blanca	65	Estimado	165	Estimado	Nivel Secundario	1		Si	Contacto estrecho	Complete	No	No	No	No	No	No	Si	No	No	No	No	No	No	No	No	No	No	No	Si	No	No	No	No	No	No	No	No		Complete
1-110	cemic		CEMIC, CABA, Buenos Aires	55	22117	Internado	22117	Sala	Masc.	A. Blanca	78	Estimado	179	Estimado	Nivel Secundario	3	Si		Comunitario(sin nexo epidemiol√≥gico)	Complete	Si	Si	No	No	No	No	No	No	No	No	No	No	No	No	No	No	No	No	No	Si	No	Si	No	No	Si	Si	No		Complete
1-111	cemic		CEMIC, CABA, Buenos Aires	69	22166	Ambulatorio		Sala	Fem.	A. Blanca	60	Estimado	159	Estimado	Nivel Secundario	1	Si	No	Comunitario(sin nexo epidemiol√≥gico)	Complete	No	No	No	No	No	No	No	No	No	No	No	No	No	No	No	No	No	No	Si	No	No	No	No	No	No	No	No		Complete
1-112	cemic		CEMIC, CABA, Buenos Aires	78	22168	Ambulatorio		Sala	Masc.	A. Blanca	71	Estimado	168	Estimado	Nivel Universitario completo	1	Si	No	Contacto estrecho	Complete	Si	No	No	No	No	No	No	No	No	No	No	No	No	No	No	No	No	No	Si	No	No	No	No	No	No	No	No		Complete
1-113	cemic		CEMIC, CABA, Buenos Aires	64	22123	Internado	22123	Sala	Fem.	A. Blanca	70	Estimado	165	Estimado	Nivel Universitario incompleto		Si	Si	Contacto estrecho	Complete	No	No	No	No	No	No	No	No	No	No	No	No	No	Si	No	No	No	No	No	No	No	No	No	No	No	No	No		Complete
1-114	cemic		CEMIC, CABA, Buenos Aires	38	22126	Internado	22126	Sala	Fem.	A. Blanca	80		168	Estimado	Nivel Terciario		Si	Si		Incomplete	No	No	No	No	No	No	No	No	No	No	No	No	No	No	No	No	No	No	No	No	No	No	No	No	No	No	No		Complete
1-115	cemic		CEMIC, CABA, Buenos Aires	80	22112	Internado	22112	Sala	Masc.	A. Blanca	85	Medido	170	Medido	Nivel Secundario	1	Si	Si	Comunitario(sin nexo epidemiol√≥gico)	Complete	Si	Si	No	No	No	No	No	No	No	No	No	No	No	No	No	No	No	Si	No	No	No	Si	No	No	Si	No	No		Complete
1-116	cemic		cemic	59	22076	Internado	22077	Sala	Fem.	A. Blanca	80	Estimado	1.52	Estimado	Nivel Terciario		Si	No	Personal salud	Complete	No	No	No	No	No	No	No	No	No	No	No	No	No	No	No	No	No	No	No	No	No	No	No	No	No	No	No		Complete
1-117	cemic		cemic	61	22130	Internado	22130	Sala	Masc.	A. Blanca	88	Estimado	1.69	Estimado		0	Si	Si	Comunitario(sin nexo epidemiol√≥gico)	Complete	Si	Si	No	No	No	No	No	No	No	No	No	Si	No	No	No	No	No	No	No	No	No	No	No	No	No	No	No		Complete
1-118	cemic		cemic	74	22078	Internado	22078	Sala	Masc.	A. Blanca	78	Estimado					Si		Comunitario(sin nexo epidemiol√≥gico)	Complete	No	No	No	No	No	No	No	No	No	No	No	Si	No	No	No	No	No	No	No	No	No	No	No	No	No	No	No		Complete
1-119	cemic		cemic	63	22080	Internado	22080	Sala	Masc.	A. Blanca							Si	Si	Comunitario(sin nexo epidemiol√≥gico)	Complete	No	No	No	No	No	No	No	No	No	No	No	No	No	No	No	No	No	No	Si	No	No	No	No	No	No	No	No		Complete
1-120	cemic		cemic	34	22081	Internado	22081	Terapia	Masc.	A. Blanca	86	Estimado	1.74	Estimado	Nivel Universitario completo		Si		Personal salud	Complete	No	No	No	No	No	No	No	No	No	No	No	No	No	No	No	No	No	Si	No	No	No	No	No	No	No	No	No		Complete
1-121	cemic		cemic	34	22082	Internado	22082	Sala	Masc.	A. Blanca	87	Medido	164	Medido	Nivel Universitario completo	1	Si	Si	Personal salud	Complete	No	No	No	No	No	No	No	No	No	No	No	No	No	No	No	No	No	No	No	No	No	No	No	No	No	No	No		Complete
1-122	cemic		cemic	23	22084	Internado	22084	Sala	Masc.	A. Blanca	62					4	Si	Si	Comunitario(sin nexo epidemiol√≥gico)	Complete	No	No	No	No	No	No	No	No	No	No	No	No	No	No	No	No	No	No	No	No	No	No	No	No	No	No	No		Complete
1-123	cemic		cemic	57	22087	Internado	22087	Sala	Fem.	A. Blanca	60				Nivel Universitario completo		Si	Si	Comunitario(sin nexo epidemiol√≥gico)	Complete	Si	No	No	No	No	No	No	No	No	No	No	No	No	No	No	No	Si	No	No	No	No	No	No	No	No	No	No		Complete
1-124	cemic		cemic	48	22090	Internado	22090	Sala	Masc.	A. Blanca	85	Medido	172	Medido	Nivel Universitario completo	1	Si	Si	Personal salud	Complete	No	No	No	No	No	No	No	No	No	No	No	Si	No	No	No	No	No	No	No	No	No	No	No	No	No	No	No		Complete
1-126	cemic		cemic	37	22091	Internado	22091	Sala	Masc.	A. Blanca	86	Estimado	1.7	Estimado			Si	Si	Comunitario(sin nexo epidemiol√≥gico)	Complete	No	No	No	No	No	No	No	No	No	No	No	No	No	No	No	No	No	No	No	No	No	No	No	No	No	No	No		Complete
1-127	cemic		CEMIC CABA	89	22131	Ambulatorio		Sala	Fem.	A. Blanca	48	Estimado	152	Estimado	Nivel Universitario completo	1	No	Si	Comunitario(sin nexo epidemiol√≥gico)	Complete	No	No	Si	No	No	No	Si	No	No	No	No	No	No	No	No	No	No	No	Si	No	No	No	No	No	No	No	No		Complete
1-128	cemic		CEMIC CABA	62	22127	Ambulatorio		Sala	Masc.	A. Blanca	103	Estimado	186	Estimado	Nivel Universitario completo	1	No	Si	Comunitario(sin nexo epidemiol√≥gico)	Complete	Si	No	No	No	No	No	No	No	No	No	No	Si	No	No	No	No	No	Si	No	No	No	No	No	No	No	Si	No		Complete
1-129	cemic		CEMIC, CABA, Buenos Aires	59	22095	Ambulatorio		Sala	Masc.	A. Blanca	91	Estimado	179	Estimado	Nivel Secundario	3	No	Si	Comunitario(sin nexo epidemiol√≥gico)	Complete	No	No	No	No	No	No	No	No	No	No	No	No	No	No	No	No	No	No	No	No	No	No	No	No	No	No	No		Complete
1-130	cemic		CEMIC CABA	88	22118	Ambulatorio		Sala	Fem.	A. Blanca	52	Estimado	155	Estimado	Nivel Secundario	1	No	Si	Contacto estrecho	Complete	Si	No	No	No	No	No	Si	No	No	No	No	No	No	No	No	No	No	No	Si	No	No	No	No	No	No	No	No		Complete
1-131	cemic		cemic	28	22085	Internado	22085	Sala	Masc.	A. Blanca	80	Estimado	1.84				Si	Si	Comunitario(sin nexo epidemiol√≥gico)	Complete	No	No	No	No	No	No	No	No	No	No	No	No	No	No	No	No	No	No	No	No	No	No	No	No	No	No	No		Complete
1-132	cemic		cemic	96	22052	Internado	22052	Sala	Fem.	A. Blanca	50	Estimado	150	Estimado	Nivel Primario	1	Si	Si	Comunitario(sin nexo epidemiol√≥gico)	Complete	Si	No	No	No	No	No	Si	No	No	No	No	No	No	No	No	No	No	No	No	No	No	No	No	No	No	No	No		Complete
1-133	cemic		CEMIC CABA	53	22122	Ambulatorio		Sala	Masc.	A. Blanca	107	Estimado	179	Estimado	Nivel Terciario	4	Si	No	Personal salud	Complete	Si	Si	No	No	No	No	No	No	No	No	No	Si	No	No	No	No	No	No	No	No	No	No	No	No	No	No	No		Complete
1-134	cemic		CEMIC, CABA, Buenos Aires	60	22093	Ambulatorio		Sala	Fem.	A. Blanca	52	Estimado	165	Estimado	Nivel Terciario	3	No	Si	Contacto estrecho	Complete	No	No	No	No	No	No	No	No	No	No	No	No	Si	No	No	No	No	No	No	No	No	No	No	No	No	No	No		Complete
1-135	cemic		CEMIC, CABA, Buenos Aires	68	22097	Ambulatorio		Sala	Masc.	A. Blanca	83	Estimado	1.73	Estimado	Nivel Terciario	2	No	Si	Comunitario(sin nexo epidemiol√≥gico)	Complete	No	No	No	No	No	No	No	No	No	No	No	No	No	No	No	No	No	No	No	No	No	No	No	No	No	No	No		Complete
1-136	cemic		CEMIC CABA	77	22127	Ambulatorio		Sala	Masc.	A. Blanca	80	Estimado	171	Estimado	Nivel Universitario completo	1	No	Si	Contacto estrecho	Complete	No	No	No	No	No	No	No	No	No	No	No	No	No	No	No	No	No	No	No	No	No	No	No	No	No	Si	No		Complete
1-137	cemic		cemic	34	22091	Internado	22091	Sala	Masc.	A. Blanca	90	Estimado	1.7	Estimado			Si	Si	Comunitario(sin nexo epidemiol√≥gico)	Complete	No	No	No	No	No	No	No	No	No	No	No	No	No	No	No	No	No	No	No	No	No	No	No	No	No	No	No		Complete
1-138	cemic		CEMIC, CABA, Buenos Aires	80	22104	Ambulatorio		Sala	Fem.	A. Blanca	80	Estimado	165	Estimado	Nivel Terciario	2	No	Si	Contacto estrecho	Complete	No	No	No	No	No	No	Si	No	No	No	No	No	No	No	No	No	No	No	No	No	No	No	No	No	No	No	No		Complete
1-139	cemic		CEMIC CABA	54	22135	Ambulatorio		Sala	Masc.	A. Blanca	100	Estimado	180	Estimado	Nivel Secundario	1	Si	No	Comunitario(sin nexo epidemiol√≥gico)	Complete	No	No	No	No	No	No	No	No	No	Si	No	Si	No	No	No	No	No	No	No	No	No	Si	No	No	Si	Si	No		Complete
1-141	cemic		CEMIC CABA	61	22130	Ambulatorio		Sala	Masc.	A. Blanca	90	Estimado	170	Estimado	Nivel Secundario	0	Si	No	Comunitario(sin nexo epidemiol√≥gico)	Complete	Si	Si	No	No	No	No	No	No	No	No	No	Si	No	No	No	No	No	No	No	No	No	No	No	No	No	No	No		Complete
1-142	cemic		CEMIC CABA	88	22140	Ambulatorio		Sala	Fem.	A. Blanca	50	Estimado	155	Estimado	Nivel Secundario	1	No	Si	Comunitario(sin nexo epidemiol√≥gico)	Complete	Si	No	No	No	No	No	Si	No	No	No	No	No	No	No	No	No	No	No	No	No	No	No	No	Si	Si	No	No		Complete
1-143	cemic		CEMIC CABA	26	22127	Ambulatorio		Sala	Fem.	A. Blanca					Nivel Universitario incompleto		No	Si	Contacto estrecho	Complete	No	No	No	No	No	No	No	No	No	No	No	No	No	No	No	No	No	No	No	No	No	No	No	No	No	No	No		Complete
1-144	cemic		CEMIC, CABA, Buenos Aires	23	22100	Ambulatorio		Sala	Fem.	A. Blanca	65	Estimado	175	Estimado	Nivel Universitario completo	2	No	Si	Contacto estrecho	Complete	No	No	No	No	No	No	No	No	No	No	No	No	No	No	No	No	No	Si	No	No	No	No	No	No	No	No	No		Complete
1-145	cemic		CEMIC, CABA, Buenos Aires	63	22128	Ambulatorio		Sala	Masc.	A. Blanca	70	Estimado	170	Estimado	Nivel Universitario completo	1	No	Si	Contacto estrecho	Complete	No	No	No	No	No	No	No	No	No	No	No	No	No	Si	No	No	No	No	Si	No	No	No	No	No	No	No	No		Complete
1-146	cemic		CEMIC, CABA, Buenos Aires	71	22097	Ambulatorio		Sala	Masc.	A. Blanca	87	Estimado	162	Estimado	Nivel Primario	2	No	Si	Contacto estrecho	Complete	No	Si	No	No	No	No	Si	Si	No	No	No	No	No	No	No	No	No	No	Si	No	No	No	No	No	No	Si	No		Complete
1-147	cemic		CEMIC, CABA, Buenos Aires	85	22085	Ambulatorio		Sala	Fem.	A. Blanca	90	Estimado	170	Estimado	Nivel Primario	3	No	Si	Contacto estrecho	Complete	Si	No	No	No	No	No	No	No	No	Si	No	No	No	No	No	No	No	No	No	No	No	No	No	No	No	Si	No		Complete
1-148	cemic		cemic	66	22140	Internado	22140	Sala	Masc.	A. Blanca							No	Si	Comunitario(sin nexo epidemiol√≥gico)	Complete	No	No	No	No	No	No	No	No	No	No	No	No	No	No	No	No	Si	No	Si	No	No	No	No	No	No	No	No		Complete
1-149	cemic		CEMIC, CABA, Buenos Aires	56	22114	Ambulatorio		Sala	Fem.	A. Blanca	80	Estimado	170	Estimado	Nivel Terciario	1	No	Si	Personal salud	Complete	No	No	No	No	No	No	No	No	No	No	No	No	No	No	No	No	No	No	Si	No	No	No	No	No	No	No	No		Complete
1-150	cemic		CEMIC, CABA, Buenos Aires	35	22107	Ambulatorio		Sala	Fem.	A. Blanca	60	Estimado	158	Estimado	Nivel Universitario completo	2	No	Si	Personal salud	Complete	No	No	No	No	No	No	No	No	No	No	No	No	No	No	No	No	No	No	Si	No	No	No	No	No	No	No	No		Complete
1-151	cemic		CEMIC, CABA, Buenos Aires	75	22083	Ambulatorio		Sala	Fem.	A. Blanca	70	Estimado	170	Estimado	Nivel Universitario completo	1	No	Si	Comunitario(sin nexo epidemiol√≥gico)	Complete	Si	No	No	No	No	No	No	No	No	No	No	No	No	Si	No	No	No	No	No	No	No	No	No	No	No	No	No		Complete
1-152	cemic		CEMIC, CABA, Buenos Aires	90	22096	Ambulatorio		Sala	Masc.	A. Blanca	72	Estimado	170	Estimado	Nivel Universitario completo	2	No	Si	Contacto estrecho	Complete	No	No	Si	No	No	No	Si	No	No	No	No	No	Si	No	No	No	No	No	No	No	No	No	No	No	No	Si	No		Complete
1-153	cemic		CEMIC, CABA, Buenos Aires	85	22082	Internado	22089	Sala	Masc.	A. Blanca	70	Estimado	180	Estimado	Nivel Universitario completo	2	No	Si	Contacto estrecho	Complete	Si	No	No	No	No	No	Si	No	No	No	No	No	No	Si	No	No	No	No	Si	No	No	No	No	No	No	No	No		Complete
1-154	cemic		CEMIC, CABA, Buenos Aires	77	22106	Internado	22106	Sala	Masc.	A. Blanca	68	Estimado	63	Estimado	Nivel Terciario	1	Si	No	Conglomerado	Complete	Si	Si	No	No	No	No	No	No	No	No	No	No	No	No	No	No	No	No	No	No	No	No	No	No	No	No	No		Complete
1-155	cemic		CEMIC, CABA, Buenos Aires	88	22098	Ambulatorio		Sala	Masc.	A. Blanca	75	Estimado	170	Estimado	Nivel Secundario	2	No	Si	Contacto estrecho	Complete	No	No	No	No	Si	No	Si	No	No	No	No	No	No	No	No	No	No	No	No	No	No	No	No	No	No	No	No		Complete
1-156	cemic		CEMIC, CABA, Buenos Aires	66	22099	Ambulatorio		Sala	Fem.	A. Blanca	64	Estimado	160	Estimado	Nivel Secundario	0	No	Si	Contacto estrecho	Complete	Si	No	No	No	No	No	No	Si	No	No	No	No	No	No	No	No	No	Si	No	No	No	No	No	No	No	No	No		Complete
1-157	cemic		CEMIC, CABA, Buenos Aires	66	22128	Ambulatorio		Sala	Fem.	A. Blanca	54	Estimado	163	Estimado	Nivel Universitario completo	0	No	Si	Comunitario(sin nexo epidemiol√≥gico)	Complete	No	No	No	No	No	No	No	No	No	No	No	No	No	No	No	No	No	No	No	No	No	No	No	Si	Si	No	No		Complete
1-158	cemic		CEMIC, CABA, Buenos Aires	85	22113	Internado	22113	Sala	Masc.	A. Blanca	70	Estimado	174	Estimado	Nivel Primario	2	Si	No	Conglomerado	Complete	Si	Si	No	No	No	No	Si	No	No	No	No	No	No	No	No	No	No	No	No	No	No	No	No	No	No	No	No		Complete
1-159	cemic		CEMIC, CABA, Buenos Aires	38	22100	Ambulatorio		Sala	Fem.	A. Blanca	80	Estimado	170	Estimado	Nivel Terciario	2	No	Si	Comunitario(sin nexo epidemiol√≥gico)	Complete	No	No	No	No	No	No	No	No	No	No	No	No	No	No	No	No	No	No	No	No	No	No	No	No	No	No	No		Complete
1-160	cemic		CEMIC CABA	87	22135	Ambulatorio		Sala	Fem.	A. Blanca	60	Estimado	1.55	Estimado	Nivel Terciario	0	No	Si	Conglomerado	Complete	Si	No	No	No	No	No	Si	No	No	No	No	No	No	No	No	No	No	No	No	No	No	No	No	No	No	No	No		Complete
1-161	cemic		CEMIC CABA	48	22144	Ambulatorio		Sala	Masc.	A. Blanca	83	Estimado	184	Estimado	Nivel Universitario completo	0	No	Si	Comunitario(sin nexo epidemiol√≥gico)	Complete	No	No	No	No	No	No	No	No	No	No	No	No	No	No	No	No	No	No	Si	No	No	No	No	No	No	No	No		Complete
1-162	cemic		CEMIC CABA	41	22132	Ambulatorio		Sala	Masc.	A. Blanca	75	Estimado	170	Estimado	Nivel Universitario incompleto	1	No	Si	Comunitario(sin nexo epidemiol√≥gico)	Complete	No	No	No	No	No	No	No	No	No	No	No	Si	No	No	No	No	No	No	No	Si	No	No	No	No	Si	No	No	700	Complete
1-163	cemic		CEMIC, CABA, Buenos Aires	40	22103	Ambulatorio		Sala	Fem.	A. Blanca	120	Estimado	165	Estimado	Nivel Terciario	4	No	Si	Contacto estrecho	Complete	No	No	No	No	No	No	No	No	No	No	No	Si	No	No	No	No	No	No	No	No	No	No	No	No	No	No	No		Complete
1-164	cemic		CEMIC, CABA, Buenos Aires	72	22113	Internado	22113	Sala	Fem.	A. Blanca	65	Estimado	165	Estimado	Nivel Secundario	1	Si	No	Contacto estrecho	Complete	No	No	No	No	No	No	No	No	No	No	No	No	No	No	No	No	No	No	Si	No	No	No	No	No	No	No	No		Complete
1-165	cemic		CEMIC, CABA, Buenos Aires	85	22117	Internado	22117	Terapia	Masc.	A. Blanca	100	Estimado	170	Estimado	Nivel Secundario	1	Si	No	Comunitario(sin nexo epidemiol√≥gico)	Complete	Si	Si	Si	Si	No	No	Si	No	No	No	No	Si	No	No	No	No	No	No	Si	No	No	No	No	No	No	Si	No		Complete
3-1	h_argerich		Argerich	56	22059	Internado	22067	Sala	Masc.	A. Blanca							No	No	Comunitario(sin nexo epidemiol√≥gico)	Complete	No	No	No	No	No	No	No	No	No	No	No	Si	No	No	No	No	No	No	Si	No	No	No	No	No	No	No	No		Complete
3-3	h_argerich		ARGERICH	20	22058	Internado		Sala	Masc.	A. Blanca							No	No	Contacto estrecho	Complete	No	No	No	No	No	No	No	No	No	No	No	No	No	No	No	No	No	No	No	No	No	No	No	No	No	No	No		Complete
3-4	h_argerich		Argerich, CABA.	27	22045	Internado	22045	Sala	Masc.	A. Blanca	70	Estimado	170	Estimado			No	No	Contacto estrecho	Complete	No	No	No	No	No	No	No	No	No	No	No	No	No	No	No	No	Si	No	No	No	No	No	No	No	No	No	No		Complete
3-5	h_argerich		Argerich, CABA.	21	22045	Internado	22045	Sala	Fem.	A. Blanca	50	Estimado	160	Estimado			No	No	Contacto estrecho	Complete	No	No	No	No	No	No	No	No	No	No	No	No	No	No	No	No	No	No	No	No	No	No	No	No	No	No	No		Complete
3-6	h_argerich		Argerich, CABA	50	22040	Internado	22040	Sala	Masc.	A. Blanca	70	Estimado	170	Estimado	Nivel Secundario	4	No	No	Personal salud	Complete	No	No	No	No	No	No	No	No	No	No	No	No	No	No	No	No	No	No	No	No	No	No	No	No	No	No	No		Complete
3-7	h_argerich		Argerich, CABA	29	22040	Internado	22040	Sala	Masc.	A. Blanca	70	Estimado	170	Estimado			No	No	Contacto estrecho	Complete	No	No	No	No	No	No	No	No	No	No	No	No	No	No	No	No	No	No	No	No	No	No	No	No	No	No	No		Complete
3-8	h_argerich		Argerich, CABA	30	22040	Internado	22040	Sala	Fem.	A. Blanca	50	Estimado	160	Estimado	Nivel Secundario	3	No	No	Contacto estrecho	Complete	No	No	No	No	No	No	No	No	No	No	No	No	No	No	No	No	No	No	No	No	No	No	No	No	No	No	No		Complete
3-9	h_argerich		Argerich, CABA	60	22070	Internado	22070	Sala	Masc.	A. Blanca	70	Estimado	170	Estimado	Nivel Secundario	4	No	No	Contacto estrecho	Complete	No	No	No	No	No	No	No	No	No	No	No	No	No	No	No	No	No	No	No	No	No	No	No	No	No	No	No		Complete
3-12	h_argerich		Argerich,CABA	48	21995	Internado	21995	Sala	Masc.	A. Blanca	80	Estimado	180	Estimado	Nivel Secundario	4	No	No	Caso importado	Complete	No	No	No	No	No	No	No	No	No	No	No	No	No	No	No	No	No	Si	No	No	No	No	No	No	No	No	No		Complete
3-13	h_argerich		Argerich, CABA	57	21999	Internado	21999	Sala	Fem.	A. Blanca	70	Estimado	160	Estimado		2	Si	No	Contacto estrecho	Complete	No	No	No	No	No	No	No	No	No	No	No	No	No	No	No	No	No	No	Si	No	No	No	No	No	No	No	No		Complete
3-14	h_argerich		Argerich, CABA	34	22028	Internado	22028	Sala	Masc.	A. Blanca	75	Estimado	170	Estimado	Nivel Secundario	2	No	No	Comunitario(sin nexo epidemiol√≥gico)	Complete	No	No	No	No	No	No	No	No	No	No	No	No	No	No	No	No	No	No	No	No	No	No	No	No	No	No	No		Complete
3-16	h_argerich		Argerich, CABA	53	22026	Internado	22026	Sala	Fem.	A. Blanca	70	Estimado	155	Estimado	Nivel Terciario	4	Si	No	Personal salud	Complete	No	No	No	No	No	No	No	No	No	No	No	No	No	No	No	No	No	No	No	No	No	No	No	No	No	No	No		Complete
3-17	h_argerich		Argerich, CABA	56	22036	Internado	22036	Sala	Fem.	A. Blanca	70	Estimado	160	Estimado			No	No	Contacto estrecho	Complete	No	No	No	No	No	No	No	No	No	No	No	No	No	No	No	No	No	No	No	No	No	No	No	No	No	No	No		Complete
3-18	h_argerich		Argerich, CABA	21	22037	Internado	22037	Sala	Masc.	A. Blanca	70	Estimado	180	Estimado	Nivel Secundario		No	No	Contacto estrecho	Complete	No	No	No	No	No	No	No	No	No	No	No	No	No	No	No	No	No	No	No	No	No	No	No	No	No	No	No		Complete
3-20	h_argerich		Argerich, CABA	38	22040	Internado	22040	Sala	Masc.	A. Blanca	80	Estimado	180	Estimado	Nivel Secundario		No	No	Contacto estrecho	Complete	Si	No	No	No	No	No	No	No	No	No	No	No	No	No	No	No	No	No	No	No	No	No	No	No	No	No	No		Complete
3-21	h_argerich		Argerich, CABA	97	22042	Internado	22042	Sala	Fem.	A. Blanca	60	Estimado	160	Estimado	Nivel Primario	1	Si	No	Contacto estrecho	Complete	Si	No	No	No	No	No	No	No	No	No	No	No	No	No	No	No	No	No	No	No	No	No	No	No	No	No	No		Complete
3-22	h_argerich		Argerich, CABA	87	22042	Internado	22042	Sala	Fem.	A. Blanca	60	Estimado	160	Estimado		1	Si	No	Contacto estrecho	Complete	No	No	No	No	Si	Si	Si	No	No	No	No	No	No	No	No	No	No	No	No	No	No	No	No	No	No	No	No		Complete
3-26	h_argerich		Argerich, CABA	36	22044	Internado	22044	Sala	Masc.	A. Blanca	90	Estimado	180	Estimado	Nivel Primario	4	No	No	Conglomerado	Complete	No	No	No	No	No	No	No	No	No	No	No	No	No	No	No	No	No	No	No	No	No	No	No	No	No	No	No		Complete
3-27	h_argerich		Argerich, CABA	32	22043	Internado	22043	Sala	Fem.	A. Blanca	130	Estimado	160	Estimado	Nivel Secundario		Si	No	Contacto estrecho	Complete	No	No	No	No	No	No	No	No	No	No	No	Si	No	No	No	No	No	No	No	No	No	No	No	No	No	No	No		Complete
3-28	h_argerich		Argerich, CABA	29	22045	Internado	22045	Sala	Masc.	A. Blanca	70	Estimado	170	Estimado	Nivel Secundario	10	No	No	Conglomerado	Complete	No	No	No	No	No	No	No	No	No	No	No	No	No	No	No	No	No	No	No	No	No	No	No	No	No	No	No		Complete
3-29	h_argerich		Argerich, CABA	57	22045	Internado	22045	Sala	Masc.	A. Blanca	70	Estimado	170	Estimado		4	No	No	Conglomerado	Complete	No	No	No	No	No	No	No	No	No	No	No	No	No	No	No	No	No	No	No	No	No	No	No	No	No	No	No		Complete
3-30	h_argerich		Argerich, CABA	30	22046	Internado	22046	Sala	Fem.	A. Blanca	60	Estimado	160	Estimado	Nivel Terciario	4	No	No	Contacto estrecho	Complete	No	No	No	No	No	No	No	No	No	No	No	No	No	No	No	No	No	No	No	No	No	No	No	No	No	No	No		Complete
3-31	h_argerich		Argerich, CABA	22	22046	Internado	22046	Sala	Fem.	A. Blanca	60	Estimado	160	Estimado	Nivel Terciario	2	No	No	Personal salud	Complete	No	No	No	No	No	No	No	No	No	No	No	No	No	No	No	No	No	No	No	No	No	No	No	No	No	No	No		Complete
3-32	h_argerich		Argerich, CABA	37	22046	Internado	22046	Sala	Fem.	A. Blanca	70	Estimado	160	Estimado	Nivel Primario	6	No	No	Contacto estrecho	Complete	No	No	No	No	No	No	No	No	No	No	No	No	No	No	No	No	Si	No	No	No	No	No	No	No	No	No	No		Complete
3-34	h_argerich		Argerich, CABA	52	22047	Internado	22047	Sala	Masc.	A. Blanca	80	Estimado	170	Estimado	Nivel Secundario		No	No	Comunitario(sin nexo epidemiol√≥gico)	Complete	No	No	No	No	No	No	No	No	No	No	No	No	No	No	No	No	No	No	No	No	No	No	No	No	No	No	No		Complete
3-35	h_argerich		Argerich, CABA	30	22047	Internado	22047	Sala	Masc.	A. Blanca	70	Estimado	180	Estimado	Nivel Secundario	10	No	No	Conglomerado	Complete	No	No	No	No	No	No	No	No	No	No	No	No	No	No	No	No	No	No	No	No	No	No	No	No	No	No	No		Complete
3-36	h_argerich		Argerich, CABA	23	22047	Internado	22047	Sala	Masc.	A. Blanca	70	Estimado	170	Estimado	Nivel Secundario	5	No	No	Comunitario(sin nexo epidemiol√≥gico)	Complete	No	No	No	No	No	No	No	No	No	No	No	No	No	No	No	No	No	Si	No	No	Si	No	No	No	No	No	No		Complete
3-37	h_argerich		Argerich, CABA	41	22047	Internado	22047	Sala	Masc.	A. Blanca	90	Estimado	170	Estimado	Nivel Secundario		No	No	Contacto estrecho	Complete	No	No	No	No	No	No	No	No	No	No	No	No	No	No	No	No	No	No	No	No	Si	No	No	No	No	No	No		Complete
3-38	h_argerich		Argerich, CABA	38	22048	Internado	22048	Sala	Masc.	A. Blanca	80	Estimado	180	Estimado	Nivel Secundario	3	No	No	Comunitario(sin nexo epidemiol√≥gico)	Complete	No	No	No	No	No	No	No	No	No	No	No	No	No	No	No	No	No	No	Si	No	No	No	No	No	No	No	No		Complete
3-39	h_argerich		Argerich, CABA	33	22048	Internado	22048	Sala	Masc.	A. Blanca	80	Estimado	180	Estimado	Nivel Secundario	10	No	No	Conglomerado	Complete	No	No	No	No	No	No	No	No	No	No	No	No	No	No	No	No	No	No	No	Si	No	No	No	No	No	No	No		Complete
3-41	h_argerich		Argerich, CABA	61	22049	Internado	22049	Sala	Fem.	A. Blanca	70	Estimado	160	Estimado	Nivel Secundario		No	No	Contacto estrecho	Complete	No	No	No	No	No	No	No	No	No	No	No	No	No	No	No	No	No	No	No	No	No	No	No	No	No	No	No		Complete
3-43	h_argerich		Argerich, CABA	29	22051	Internado	22051	Sala	Masc.	A. Blanca	70	Estimado	170	Estimado	Nivel Secundario		No	No	Comunitario(sin nexo epidemiol√≥gico)	Complete	No	No	No	No	No	No	No	No	No	No	No	No	No	No	No	No	No	No	No	No	No	No	No	No	No	No	No		Complete
3-44	h_argerich		Argerich, CABA	57	22051	Internado	22051	Sala	Masc.	A. Blanca	80	Estimado	180	Estimado	Nivel Secundario	4	No	No	Contacto estrecho	Complete	Si	No	No	No	No	No	No	No	No	No	No	No	No	No	No	No	No	No	No	No	No	No	No	No	No	No	No		Complete
3-45	h_argerich		Argerich, CABA	36	22052	Internado	22052	Sala	Masc.	A. Blanca	80	Estimado	180	Estimado	Nivel Secundario	3	No	No	Contacto estrecho	Complete	No	No	No	No	No	No	No	No	No	No	No	No	No	No	No	No	No	No	No	No	No	No	No	No	No	No	No		Complete
3-47	h_argerich		Argerich, CABA	46	22053	Internado	22053	Sala	Fem.	A. Blanca	80	Estimado	160	Estimado	Nivel Secundario	3	No	No	Contacto estrecho	Complete	Si	Si	No	No	No	No	No	No	No	No	No	No	No	No	No	No	No	No	No	No	No	No	No	No	No	No	No		Complete
3-48	h_argerich		Argerich, CABA	71	22051	Internado	22057	Sala	Masc.	A. Blanca	90	Estimado	180	Estimado	Nivel Primario	4	No	No	Comunitario(sin nexo epidemiol√≥gico)	Complete	Si	No	No	No	No	No	No	No	No	No	No	No	No	No	No	No	No	Si	No	No	No	No	No	No	No	No	No		Complete
3-52	h_argerich		Argerich, CABA	58	22057	Internado	22057	Sala	Masc.	A. Blanca	70	Estimado	180	Estimado	Nivel Secundario	2	No	No	Conglomerado	Complete	No	No	No	No	No	No	No	No	No	No	No	No	No	No	No	No	No	No	No	No	No	No	No	No	No	No	No		Complete
3-53	h_argerich		Argerich, CABA	48	22055	Internado	22055	Sala	Fem.	A. Blanca	80	Estimado	170	Estimado	Nivel Secundario	4	Si	No	Comunitario(sin nexo epidemiol√≥gico)	Complete	No	No	No	No	No	No	No	No	No	No	No	No	No	No	No	No	No	No	No	No	No	No	No	No	No	No	No		Complete
3-54	h_argerich		Argerich, CABA	25	22055	Internado	22054	Sala	Fem.	A. Blanca	60	Estimado	160	Estimado	Nivel Secundario	8	No	No	Contacto estrecho	Complete	No	No	No	No	No	No	No	No	No	No	No	No	No	No	No	No	No	No	No	No	No	No	No	No	No	No	No		Complete
3-56	h_argerich		Argerich, CABA	33	22060	Internado	22060	Sala	Masc.	A. Blanca	120	Estimado	170	Estimado	Nivel Secundario	5	No	No	Comunitario(sin nexo epidemiol√≥gico)	Complete	No	No	No	No	No	No	No	No	No	No	No	Si	No	No	No	No	No	No	No	No	No	No	No	No	No	No	No		Complete
3-57	h_argerich		Argerich, CABA	51	22057	Internado	22057	Sala	Fem.	A. Blanca	60	Estimado	160	Estimado	Nivel Secundario	5	No	No	Comunitario(sin nexo epidemiol√≥gico)	Complete	Si	No	No	No	No	No	No	No	No	No	No	No	No	No	No	No	Si	No	No	No	No	No	No	No	No	No	No		Complete
3-58	h_argerich		Argerich, CABA	28	22057	Internado	22026	Terapia	Masc.	A. Blanca	70	Estimado	170	Estimado	Nivel Secundario		No	No	Contacto estrecho	Complete	No	No	No	No	No	No	No	No	No	No	No	No	No	No	No	Si	No	No	No	No	No	No	No	No	No	No	No		Complete
3-59	h_argerich		Argerich, CABA	34	22057	Internado	22057	Sala	Fem.	A. Blanca	80	Estimado	150	Estimado	Nivel Secundario		No	No	Contacto estrecho	Complete	No	No	No	No	No	No	No	No	No	No	No	Si	No	No	No	No	Si	No	No	No	No	No	No	Si	No	No	No		Complete
3-60	h_argerich		Argerich, CABA	58	22056	Internado	22056	Sala	Fem.	A. Blanca	70	Estimado	170	Estimado	Nivel Secundario	3	No	No	Contacto estrecho	Complete	No	No	No	No	No	No	No	No	No	No	No	No	No	No	No	No	No	No	No	No	No	No	No	No	No	No	No		Complete
3-61	h_argerich		Argerich, CABA	42	22058	Internado	22058	Sala	Fem.	A. Blanca	60	Estimado	160	Estimado	Nivel Terciario	4	No	No	Contacto estrecho	Complete	No	No	No	No	No	No	No	No	No	No	No	No	No	No	No	No	No	No	No	No	No	No	No	No	No	No	No		Complete
3-62	h_argerich		Argerich, CABA	50	22058	Internado	22058	Sala	Masc.	A. Blanca	70	Estimado	175	Estimado	Nivel Secundario	10	No	No	Contacto estrecho	Complete	No	No	No	No	No	No	No	No	No	No	No	No	No	No	No	No	No	No	No	No	No	No	No	No	No	No	No		Complete
3-63	h_argerich		Argerich, CABA	50	22058	Internado	22058	Sala	Fem.	A. Blanca	60	Estimado	160	Estimado	Nivel Secundario	4	No	No	Conglomerado	Complete	No	No	No	No	No	No	No	No	No	No	No	No	No	No	No	No	Si	No	Si	No	No	No	No	No	No	No	No		Complete
3-64	h_argerich		Argerich, CABA	22	22058	Internado	22058	Sala	Fem.	A. Blanca	55	Estimado	150	Estimado	Nivel Secundario	4	No	No	Contacto estrecho	Complete	No	No	No	No	No	No	No	No	No	No	No	No	No	No	No	No	No	No	No	No	No	No	No	No	No	No	No		Complete
3-65	h_argerich		Argerich, CABA	56	22067	Internado	22067	Sala	Masc.	A. Blanca	130	Estimado	170	Estimado	Nivel Terciario	4	No	No	Comunitario(sin nexo epidemiol√≥gico)	Complete	No	No	No	No	No	No	No	No	No	No	No	Si	No	No	No	No	No	Si	No	No	No	No	No	No	No	No	No		Complete
3-68	h_argerich		Argerich, CABA	26	22059	Internado	22059	Sala	Masc.	A. Blanca	80	Estimado	160	Estimado	Nivel Secundario	3	No	No	Comunitario(sin nexo epidemiol√≥gico)	Complete	No	No	No	No	No	No	No	No	No	No	No	No	No	No	No	No	No	No	No	No	No	No	No	No	No	No	No		Complete
3-70	h_argerich		Argerich, CABA	82	22060	Internado	22060	Sala	Fem.	A. Blanca	70	Estimado	170	Estimado	Nivel Secundario	2	No	No	Comunitario(sin nexo epidemiol√≥gico)	Complete	Si	No	No	No	No	No	No	No	No	Si	No	No	No	No	No	No	No	No	No	No	No	No	No	Si	No	No	No		Complete
3-71	h_argerich		Argerich, CABA	43	22060	Internado	22060	Sala	Masc.	A. Blanca	60	Estimado	160	Estimado	Nivel Primario	1	No	No	Comunitario(sin nexo epidemiol√≥gico)	Complete	No	No	No	No	No	No	No	No	No	No	No	No	No	No	No	No	Si	No	No	No	Si	No	No	No	No	No	No		Complete
3-72	h_argerich		Argerich, CABA	35	22061	Internado	22061	Sala	Masc.	A. Blanca	90	Estimado	170	Estimado	Nivel Secundario	2	No	No	Comunitario(sin nexo epidemiol√≥gico)	Complete	No	No	No	No	No	No	No	No	No	No	No	Si	No	No	No	No	No	No	No	No	No	No	No	No	No	No	No		Complete
3-73	h_argerich		Argerich, CABA	31	22061	Internado	22061	Sala	Fem.	A. Blanca	60	Estimado	160	Estimado	Nivel Secundario	4	No	No	Conglomerado	Complete	No	No	No	No	No	No	No	No	No	No	No	No	No	No	No	No	No	No	No	No	No	No	No	No	No	No	Si		Complete
3-75	h_argerich		Argerich, CABA	19	22061	Internado	22061	Sala	Fem.	A. Blanca	90	Estimado	170	Estimado	Nivel Secundario	4	No	No	Contacto estrecho	Complete	No	No	No	No	No	No	No	No	No	No	No	Si	No	No	No	No	No	No	No	No	No	No	No	No	No	No	No		Complete
3-76	h_argerich		Argerich, CABA	34	22047	Internado	22047	Sala	Masc.	A. Blanca	70	Estimado	170	Estimado	Nivel Secundario		No	No	Contacto estrecho	Complete	No	No	No	No	No	No	No	No	No	No	No	No	No	No	No	No	No	No	No	No	No	No	No	No	No	No	No		Complete
3-77	h_argerich		Argerich, CABA	26	22004	Internado	22004	Sala	Masc.	A. Blanca	70	Estimado	170	Estimado	Nivel Secundario	4	No	No	Contacto estrecho	Complete	No	No	No	No	No	No	No	No	No	No	No	No	No	No	No	No	Si	No	No	No	No	No	No	No	No	No	No		Complete
3-78	h_argerich		Argerich, CABA	67	22004	Internado	22004	Sala	Masc.	A. Blanca	80	Estimado	180	Estimado	Nivel Secundario	4	No	No	Contacto estrecho	Complete	Si	Si	No	Si	No	No	No	No	No	No	No	No	No	No	No	No	No	No	No	No	No	No	No	No	No	No	No		Complete
3-79	h_argerich		Argerich	64	21979	Internado	21979	Guardia	Masc.	A. Blanca	95	Estimado	180	Estimado	Nivel Secundario		No	No	Caso importado	Complete	Si	Si	No	Si	No	No	No	No	No	No	No	No	No	No	No	No	No	Si	No	No	No	No	No	No	No	No	No		Complete
3-82	h_argerich		Argerich, CABA	88	22062	Internado	22062	Sala	Fem.	A. Blanca	60	Estimado	160	Estimado	Nivel Secundario	1	Si	No	Contacto estrecho	Complete	Si	No	No	No	No	No	Si	No	No	No	No	No	No	No	No	No	No	No	No	No	No	No	No	No	No	No	No		Complete
3-83	h_argerich		Argerich, CABA, Bs As	39	22061	Ambulatorio		Sala	Masc.	A. Blanca	70	Estimado	170	Estimado					Comunitario(sin nexo epidemiol√≥gico)	Complete	No	No	No	No	No	No	No	No	No	No	No	No	No	No	No	No	No	No	No	No	No	No	No	No	No	No	No		Complete
3-84	h_argerich		Argerich, CABA, Bs As	25	22064	Ambulatorio		Sala	Fem.	A. Blanca	70	Estimado	160	Estimado					Comunitario(sin nexo epidemiol√≥gico)	Complete	No	No	No	No	No	No	No	No	No	No	No	No	No	No	No	No	No	No	No	No	No	No	No	No	No	No	Si		Complete
3-85	h_argerich		Argerich, CABA, Bs As	38	22063	Ambulatorio		Sala	Masc.	A. Blanca	70	Estimado	170	Estimado					Comunitario(sin nexo epidemiol√≥gico)	Complete	No	No	No	No	No	No	No	No	No	No	No	No	No	No	No	No	No	No	No	No	No	No	No	No	No	No	No		Complete
3-86	h_argerich		Argerich, CABA, Bs As	52	22065	Ambulatorio		Sala	Masc.	A. Blanca	70	Estimado	170	Estimado					Comunitario(sin nexo epidemiol√≥gico)	Complete	No	No	No	No	No	No	No	No	No	No	No	Si	No	No	No	No	No	No	No	No	No	No	No	No	No	No	No		Complete
3-87	h_argerich		Argerich, CABA, Bs As	30	22065	Ambulatorio		Sala	Masc.	A. Blanca	70	Estimado	170	Estimado			No	No	Comunitario(sin nexo epidemiol√≥gico)	Complete	No	No	No	No	No	No	No	No	No	No	No	No	No	No	No	No	No	No	No	No	No	No	No	No	No	No	No		Complete
3-89	h_argerich		Argerich, CABA, BsAs	74	22039	Ambulatorio		Sala	Masc.	A. Blanca	70	Estimado	170	Estimado					Contacto estrecho	Complete	No	No	No	No	No	No	No	No	No	No	No	No	No	No	No	No	No	No	No	No	No	No	No	No	No	No	No		Complete
3-90	h_argerich		Argerich, CABA, BsAs	54	22064	Ambulatorio		Sala	Fem.	A. Blanca	65	Estimado	165	Estimado					Contacto estrecho	Complete	Si	Si	No	No	No	No	No	No	No	No	No	No	No	No	No	No	No	No	No	No	No	No	No	No	No	No	No		Complete
3-91	h_argerich		Argerich, CABA, BsAs	24	22063	Ambulatorio		Sala	Fem.	A. Blanca	65	Estimado	165	Estimado	Nivel Secundario				Contacto estrecho	Complete	No	No	No	No	No	No	No	No	No	No	No	No	No	No	No	No	No	No	No	No	No	No	No	No	No	No	Si		Complete
3-92	h_argerich		Argerich, CABA	27	22041	Internado	22041	Terapia	Masc.	A. Blanca	120	Estimado	170	Estimado	Nivel Secundario	2	No	No	Comunitario(sin nexo epidemiol√≥gico)	Complete	No	No	No	No	No	No	No	No	No	No	No	Si	No	No	No	No	No	No	No	No	No	No	No	No	No	No	No		Complete
3-93	h_argerich		Argerich, CABA, BsAs	63	22120	Internado	22120	Terapia	Fem.	A. Blanca	100	Estimado	160	Estimado					Contacto estrecho	Complete	Si	Si	No	No	No	No	No	No	No	No	No	Si	No	No	No	No	No	No	No	No	No	No	No	No	No	No	No		Complete
3-94	h_argerich		Argerich, CABA	21	22063	Internado	22063	Sala	Fem.	A. Blanca	60	Estimado	160	Estimado	Nivel Secundario	4	No	No	Contacto estrecho	Complete	No	No	No	No	No	No	No	No	No	No	No	No	No	No	No	No	No	No	No	No	No	No	No	No	No	No	No		Complete
3-96	h_argerich		Argerich, CABA	53	22065	Internado	22065	Sala	Fem.	A. Blanca	80	Estimado	165	Estimado	Nivel Primario	3	No	No	Contacto estrecho	Complete	No	No	No	No	No	No	No	No	No	No	No	Si	No	No	No	No	No	No	No	No	No	No	No	No	No	No	No		Complete
3-99	h_argerich		Argerich	33	22068	Internado	22068	Sala	Fem.	A. Blanca							No	No	Contacto estrecho	Complete	No	No	No	No	No	No	No	No	No	No	No	No	No	No	No	No	No	No	No	No	No	No	No	No	No	No	No		Complete
3-100	h_argerich		Argerh, CABA, BsAs	38	22068	Ambulatorio		Sala	Fem.	A. Blanca	75	Estimado	165	Estimado					Comunitario(sin nexo epidemiol√≥gico)	Complete	No	No	No	No	No	No	No	No	No	No	No	Si	No	No	No	No	No	No	No	No	No	No	No	No	No	No	No		Complete
3-101	h_argerich		Argerich, CABA,, BsAs	40	22067	Ambulatorio		Sala	Fem.	A. Blanca	70	Estimado	160	Estimado					Comunitario(sin nexo epidemiol√≥gico)	Complete	No	No	No	No	No	No	No	No	No	No	No	Si	No	No	No	No	No	No	No	No	No	No	No	No	No	No	No		Complete
3-102	h_argerich		Argerih, CABA, BsAs	41	22067	Ambulatorio		Sala	Masc.	A. Blanca	90	Estimado	170	Estimado					Comunitario(sin nexo epidemiol√≥gico)	Complete	No	No	No	No	No	No	No	No	No	No	No	Si	No	No	No	No	No	No	No	No	No	No	No	No	No	No	No		Complete
3-104	h_argerich		Argerich, CABA, BsAs	76	22068	Ambulatorio		Sala	Masc.	A. Blanca	60	Estimado	170	Estimado					Contacto estrecho	Complete	Si	No	No	No	No	No	No	No	No	No	No	No	No	No	No	No	No	No	No	Si	No	No	No	No	No	No	No	500	Complete
3-105	h_argerich		Argerich, CABA, BsAs	59	22069	Ambulatorio		Sala	Masc.	A. Blanca	80	Estimado	175	Estimado					Comunitario(sin nexo epidemiol√≥gico)	Complete	No	No	No	No	No	No	No	No	No	No	No	No	No	No	No	No	No	No	No	No	No	No	No	No	No	No	No		Complete
3-106	h_argerich		Argerich, CABA	80	22053	Internado	22053	Terapia	Masc.	A. Blanca	80	Estimado	180	Estimado	Nivel Secundario	2	No	No	Contacto estrecho	Complete	No	Si	No	No	No	No	No	No	No	No	No	No	No	No	No	No	No	No	No	No	No	No	No	No	No	No	No		Complete
3-108	h_argerich		Argerich	69	22070	Internado	22070	Sala	Masc.	A. Blanca	60	Estimado	1.6	Estimado			No	No	Contacto estrecho	Complete	No	No	No	No	No	No	No	No	No	No	No	No	No	No	No	No	No	No	No	No	No	No	No	No	No	No	No		Complete
3-110	h_argerich		Argerich, CABA, BsAs	76	22069	Ambulatorio		Sala	Masc.	A. Blanca	75	Estimado	170	Estimado					Contacto estrecho	Complete	No	No	No	No	No	No	Si	No	No	No	No	No	No	No	No	No	No	No	No	No	No	No	No	No	No	No	No		Complete
3-113	h_argerich		Argerich	58	22071	Internado	22071	Sala	Masc.								No	No	Contacto estrecho	Complete	Si	Si	No	Si	No	No	No	No	No	No	No	No	No	No	No	No	No	No	Si	No	No	No	No	No	No	No	No		Complete
3-114	h_argerich		Argerich	56	22067	Internado	22067	Sala	Masc.	A. Blanca	70	Estimado	170	Estimado			No	No	Contacto estrecho	Complete	No	No	No	No	No	No	No	No	No	No	No	No	No	No	No	No	No	Si	No	No	No	No	No	No	No	No	No		Complete
3-115	h_argerich		Argerich	52	22072	Internado	22072	Sala	Fem.	A. Blanca	65	Estimado	165	Estimado					Comunitario(sin nexo epidemiol√≥gico)	Complete	No	Si	No	No	No	No	No	No	No	No	No	No	No	No	No	No	No	No	No	No	No	No	No	No	No	No	No		Complete
3-117	h_argerich		Argerich	71	22072	Internado	22070	Sala	Fem.	A. Blanca	50	Estimado	165	Estimado					Comunitario(sin nexo epidemiol√≥gico)	Complete	Si	No	No	No	No	No	No	Si	No	No	No	No	No	No	No	No	No	No	No	No	No	No	No	Si	No	No	No		Complete
3-118	h_argerich		Argerich	31	22071	Internado	22071	Sala	Fem.	A. Blanca	50	Estimado	160	Estimado			Si	No	Contacto estrecho	Complete	No	No	No	No	No	No	No	No	No	No	No	No	No	No	No	No	No	No	No	No	No	No	Si	No	No	No	No		Complete
3-119	h_argerich		Argerich	26	22072	Internado	22072	Sala	Fem.	A. Blanca	50	Estimado	160	Estimado			No	No	Comunitario(sin nexo epidemiol√≥gico)	Complete	No	No	No	No	No	No	No	No	No	No	No	No	No	No	No	No	No	Si	No	No	Si	No	No	No	No	No	No		Complete
3-120	h_argerich		Argerich	59	22073	Internado	22074	Sala	Fem.	A. Blanca	75	Estimado	160	Estimado					Contacto estrecho	Complete	No	No	No	No	No	No	No	No	No	No	No	Si	No	No	No	No	Si	No	No	No	No	No	No	No	No	No	No		Complete
3-121	h_argerich		Argerich, CABA, Bs As	45	22071	Internado	22071	Sala	Masc.	A. Blanca	70	Estimado	170	Estimado					Contacto estrecho	Complete	No	No	No	No	No	No	No	No	No	No	No	No	No	No	No	No	No	No	No	No	No	No	No	No	No	No	No		Complete
3-122	h_argerich		Argerich, CABA, Bs As	65	22070	Internado	22070	Sala	Masc.	A. Blanca	70	Estimado	170	Estimado					Comunitario(sin nexo epidemiol√≥gico)	Complete	No	No	No	No	No	No	No	No	No	No	No	No	No	No	No	No	No	No	No	No	No	No	No	No	No	No	No		Complete
3-123	h_argerich		Argerich	95	22009	Internado	22009	Sala	Masc.	A. Blanca							No	No	Comunitario(sin nexo epidemiol√≥gico)	Complete	Si	No	No	Si	No	Si	Si	No	No	No	No	No	No	No	No	No	No	No	No	No	No	No	No	No	No	No	No		Complete
3-124	h_argerich		Argerich	37	22047	Internado	22053	Sala	Fem.	A. Blanca							No	No	Comunitario(sin nexo epidemiol√≥gico)	Complete	Si	No	No	No	No	No	No	No	No	No	No	Si	No	No	No	No	No	No	No	No	No	No	No	No	No	No	No		Complete
3-125	h_argerich		Argerich	35	22054	Internado	22054	Sala	Masc.								No	No	Comunitario(sin nexo epidemiol√≥gico)	Complete	No	Si	No	No	No	No	No	No	No	No	No	No	No	No	No	No	No	No	No	No	No	No	No	No	No	No	No		Complete
3-126	h_argerich		Argerich, CABA, Bs As	38	22055	Internado	22055	Terapia	Masc.	A. Blanca	120	Estimado	170	Estimado					Comunitario(sin nexo epidemiol√≥gico)	Complete	Si	Si	No	No	No	No	No	No	No	No	No	Si	No	No	No	No	Si	No	No	No	No	No	No	No	No	No	No		Complete
3-128	h_argerich		Argerich, CABA, BsAs	40	22054	Internado	22054	Sala	Masc.		70	Estimado	180	Estimado	Nivel Secundario		No	No	Comunitario(sin nexo epidemiol√≥gico)	Complete	No	No	No	No	No	No	No	No	No	No	No	No	No	No	No	No	No	Si	No	No	No	No	No	No	No	No	No		Complete
4-1	h_italiano		Hospital Italiano de Buenos Aires	73	22036	Internado	22036	Terapia	Masc.	A. Blanca	90	Medido	165	Medido			No	Si	Comunitario(sin nexo epidemiol√≥gico)	Complete	Si	Si	No	No	No	No	No	No	No	No	No	Si	No	No	No	No	No	No	Si	No	No	No	No	No	No	No	No		Complete
4-2	h_italiano		Hospital Italiano de Buenos Aires	28	22055	Ambulatorio		Sala	Fem.	A. Blanca	83		165	Estimado			No	Si	Comunitario(sin nexo epidemiol√≥gico)	Complete	No	No	No	No	No	No	No	No	No	No	No	Si	No	No	No	No	No	No	No	No	No	No	No	No	No	No	No		Complete
4-3	h_italiano		Hospital italiano / Buenos Aires	41	22045	Internado	22045	Sala	Masc.	A. Blanca	114	Medido	172	Medido	Nivel Universitario completo	0	No	Si	Personal salud	Complete	No	No	No	No	No	No	No	No	No	No	No	Si	No	No	No	No	No	No	Si	No	No	No	No	No	No	No	No		Complete
4-4	h_italiano		Hospital Italiano	31	22058	Internado	22058	Sala	Masc.	A. Blanca	80	Estimado	1.72	Medido	Nivel Universitario completo	1	Si	Si	Contacto estrecho	Complete	No	No	No	No	No	No	No	No	No	No	No	No	No	No	No	No	No	No	No	No	No	No	No	No	No	No	No		Complete
4-5	h_italiano		Hospita Italiano de Buenos Aires	26	22037	Internado	22037	Sala	Fem.	A. Blanca	57	Medido	1.57	Medido	Nivel Universitario completo			Si	Personal salud	Complete	No	No	No	No	No	No	No	No	No	No	No	No	No	No	No	No	No	No	No	No	No	No	No	No	No	No	No		Complete
4-6	h_italiano		hospital italiano	24	22059	Internado	22059	Sala	Fem.	A. Blanca	60	Estimado	165	Medido	Nivel Terciario	4	Si	Si	Contacto estrecho	Complete	No	No	No	No	No	No	No	No	No	No	No	No	No	No	No	No	No	No	No	No	No	No	No	No	No	No	No		Complete
4-7	h_italiano		hospital italiano	42	22047	Internado	22047	Sala	Fem.	A. Blanca	59	Medido	159	Medido	Nivel Universitario completo	4	Si	No	Personal salud	Complete	No	No	No	No	No	No	No	No	No	No	No	No	No	No	No	No	No	No	No	No	No	No	No	No	No	No	No		Complete
4-8	h_italiano		hospital italiano	28	22058	Internado	22058	Sala	Fem.	A. Blanca	71	Medido	152	Medido	Nivel Universitario completo	1	Si	No	Comunitario(sin nexo epidemiol√≥gico)	Complete	No	No	No	No	No	No	No	No	No	No	No	No	No	No	No	No	No	No	No	No	No	No	No	No	No	No	Si		Complete
4-9	h_italiano		hospital italiano	56	22048	Internado	22048	Sala	Masc.	A. Blanca	50		162	Medido	Nivel Primario	4	Si	Si	Conglomerado	Complete	No	No	No	No	No	No	No	No	No	No	No	No	No	No	No	No	No	No	No	No	No	No	No	Si	No	No	No		Complete
4-10	h_italiano		hospital italiano	25	22058	Internado	22058	Sala	Fem.	A. Blanca	43	Medido	157	Medido	Nivel Universitario completo	3	Si	Si	Personal salud	Complete	No	No	No	No	No	No	No	No	No	No	No	No	No	No	No	No	No	No	No	No	No	No	No	No	No	No	No		Complete
4-11	h_italiano		Hospital italiano de Buenos Aires	73	22055	Internado	22055	Sala	Masc.	A. Blanca	80	Medido	1.76	Medido			No	Si	Contacto estrecho	Complete	No	No	No	No	No	No	No	No	No	No	No	No	No	No	No	No	No	No	No	No	No	No	No	No	No	No	No		Complete
4-12	h_italiano		Hospital Italiano	21	22059	Internado	22059	Sala	Masc.		56	Medido	160	Medido			Si	No	Comunitario(sin nexo epidemiol√≥gico)	Complete	No	No	No	No	No	No	No	No	No	No	No	No	No	No	No	No	No	No	No	No	No	No	No	No	No	No	No		Complete
4-13	h_italiano		hospital italiano	26	22059	Internado	22059	Sala	Masc.		53	Medido	155	Medido			Si	No	Comunitario(sin nexo epidemiol√≥gico)	Complete	No	No	No	No	No	No	No	No	No	No	No	No	No	No	No	No	No	No	No	No	No	No	No	No	No	No	No		Complete
4-14	h_italiano		Hospital Italiano de Buenos Aires	96	22041	Internado	22164	Sala	Fem.	A. Blanca	49	Medido	145	Medido				Si	Conglomerado	Complete	No	No	No	No	No	Si	Si	No	No	No	No	No	No	No	No	No	No	No	No	No	No	No	No	No	No	No	No		Complete
4-15	h_italiano		Hospital Italiano Central	29	22047	Internado	22047	Sala	Masc.	A. Blanca					Nivel Terciario	1	Si	Si	Personal salud	Complete	No	No	No	No	No	No	No	No	No	No	No	No	No	No	No	No	No	No	No	No	No	No	No	No	No	No	No		Complete
4-16	h_italiano		Hospital Italiano Central	29	22047	Internado	22047	Sala	Fem.	A. Blanca	96	Medido	162	Estimado	Nivel Terciario	4	Si	No	Personal salud	Complete	No	No	No	No	No	No	No	No	No	No	No	Si	No	No	No	No	No	No	No	No	No	No	No	No	No	No	No		Complete
4-17	h_italiano		Hospital Italiano Central	35	22048	Internado	22048	Sala	Fem.	A. Blanca	87.8	Medido	152	Estimado	Nivel Terciario		No	Si	Personal salud	Complete	No	No	No	No	No	No	No	No	No	No	No	Si	No	No	No	No	No	No	No	No	No	No	No	No	No	No	No		Complete
4-18	h_italiano		Hospital Italiano Central	89	22049	Internado	22049	Sala	Fem.	A. Blanca	50	Estimado	159	Estimado			No	Si	Conglomerado	Complete	Si	Si	Si	No	No	Si	Si	No	No	No	No	No	No	No	No	No	No	No	Si	No	No	No	No	No	No	No	No		Complete
4-19	h_italiano		Hospital Italiano Central	46	22050	Internado	22050	Sala	Fem.	A. Blanca	62	Medido	150	Estimado			No	Si	Contacto estrecho	Complete	No	No	No	No	No	No	No	No	No	No	No	No	No	No	No	No	No	No	Si	No	No	No	No	No	No	No	No		Complete
4-20	h_italiano		Hospital Italiano Central	62	22050	Internado	22050	Sala	Fem.	A. Blanca							Si	No	Contacto estrecho	Complete	Si	Si	No	No	No	No	No	No	No	No	No	No	No	No	No	No	No	No	No	No	No	No	No	No	No	No	No		Complete
4-21	h_italiano		Hospital italiano central	68	22050	Internado	22050	Sala	Masc.	A. Blanca	114	Medido					Si	No	Contacto estrecho	Complete	No	Si	No	No	No	No	No	No	No	No	No	No	No	No	No	No	No	No	No	No	No	No	No	No	No	No	No		Complete
4-22	h_italiano		Hospital Italiano de Buenos aires	92	22042	Internado	22042	Sala	Fem.	A. Blanca	56	Medido	159	Medido				Si	Conglomerado	Complete	No	No	No	No	No	No	No	No	No	No	No	No	Si	No	No	No	No	No	No	No	No	No	No	No	No	No	No		Complete
4-23	h_italiano		hospital italiano	85	22060	Internado	22060	Sala	Fem.	A. Blanca	43.2	Medido	1.52	Medido			Si	Si	Conglomerado	Complete	Si	No	No	No	No	No	Si	No	No	No	No	No	No	No	No	No	No	No	No	No	No	No	No	No	No	No	No		Complete
4-24	h_italiano		hospital italiano	57	22060	Internado	22091	Sala	Fem.	D. Pueblo originario					Nivel Secundario	10	Si	No	Contacto estrecho	Complete	No	No	No	No	No	No	No	No	No	No	No	No	No	No	No	No	No	No	No	No	No	No	No	No	No	No	No		Complete
4-25	h_italiano		hospital ilitaliano	18	22060	Internado	22060	Sala	Masc.	D. Pueblo originario	134	Medido	173	Medido		10	Si	No	Contacto estrecho	Complete	No	No	No	No	No	No	No	No	No	No	No	Si	No	No	No	No	No	No	No	No	No	No	No	No	No	No	No		Complete
4-26	h_italiano		hospital italiano	41	22059	Internado	22059	Sala	Fem.	A. Blanca	75	Medido	168	Medido	Nivel Universitario completo		Si	Si	Personal salud	Complete	No	No	No	No	No	No	No	No	No	No	No	No	No	No	No	No	No	No	No	No	No	No	No	No	No	No	No		Complete
4-27	h_italiano		Hospital Italiano de Buenos Aires	94	22042	Internado	22042	Sala	Fem.	A. Blanca	76	Medido	152	Medido			No	Si	Conglomerado	Complete	Si	No	Si	Si	No	No	Si	No	No	No	No	Si	Si	No	No	No	No	No	No	No	No	No	No	No	No	No	No		Complete
4-28	h_italiano		Hospital Italiano de Buenos aires	43	22042	Internado	22042	Sala	Fem.	A. Blanca	76	Medido	155	Medido	Nivel Universitario completo		Si	No	Personal salud	Complete	No	No	No	No	No	No	No	No	No	No	No	No	No	No	No	No	No	No	No	No	No	No	No	No	No	No	No		Complete
4-29	h_italiano		Hospital Italiano de Buenos aires	41	22043	Internado	22166	Sala	Masc.	A. Blanca	84	Medido	176				No	Si	Contacto estrecho	Complete	No	No	No	No	No	No	No	No	No	No	No	No	No	No	No	No	No	No	No	No	No	No	No	No	No	No	No		Complete
4-30	h_italiano		Hospital Italiano de Buenos aires	23	22045	Internado	22045	Sala	Fem.		94	Medido	159	Medido		8	No	Si	Contacto estrecho	Complete	No	No	No	No	No	No	No	No	No	No	No	Si	No	No	No	No	No	No	No	No	No	No	No	No	No	No	No		Complete
4-31	h_italiano		Hospital Italiano de Buenos aires	37	22043	Internado	22043	Sala	Masc.								No	Si	Contacto estrecho	Complete	No	No	No	No	No	No	No	No	No	No	No	No	No	No	No	No	No	No	No	No	No	No	No	No	No	No	No		Complete
4-32	h_italiano		Hospital Italiano de Buenos Aires	80	22055	Internado	22055	Sala	Fem.	A. Blanca	60	Estimado	160	Estimado			No	Si	Comunitario(sin nexo epidemiol√≥gico)	Complete	Si	No	No	Si	No	No	No	No	No	No	No	No	No	No	No	No	No	Si	Si	No	No	No	No	No	No	Si	No		Complete
4-33	h_italiano		Hospital Italiano de Buenos Aires	70	22041	Ambulatorio		Sala	Masc.	A. Blanca	73	Medido	170	Medido			No	Si	Comunitario(sin nexo epidemiol√≥gico)	Complete	Si	Si	No	No	No	No	No	No	No	No	No	No	No	No	No	No	No	No	No	No	No	No	No	No	No	No	No		Complete
4-34	h_italiano		Hospital Italiano de Buenos Aires	94	22056	Internado	22056	Guardia	Fem.	A. Blanca	60	Estimado	162	Estimado			Si		Comunitario(sin nexo epidemiol√≥gico)	Complete	No	No	No	Si	No	No	Si	No	No	No	No	No	No	No	No	No	No	No	No	No	No	No	No	No	No	No	No		Complete
4-35	h_italiano		Hospital Italiano de Buenos Aires / CABA	57	22050	Ambulatorio		Sala	Fem.	A. Blanca	89	Medido	156	Medido	Nivel Secundario	3		Si	Comunitario(sin nexo epidemiol√≥gico)	Complete	Si	No	No	No	No	No	No	No	No	No	No	Si	No	No	No	No	No	No	No	No	No	No	No	No	No	Si	No		Complete
4-36	h_italiano		Hospital Italiano de Buenos Aires / CABA	25	22050	Ambulatorio		Sala	Masc.	A. Blanca	84.2	Medido	178	Estimado	Nivel Universitario incompleto		Si	No	Comunitario(sin nexo epidemiol√≥gico)	Complete	No	No	No	No	No	No	No	No	No	No	No	No	No	No	No	No	No	No	No	No	No	No	No	No	No	No	No		Complete
4-37	h_italiano		Hospital Italiano de Buenos Aires / CABA	20	22048	Ambulatorio		Sala	Masc.	A. Blanca	91.5	Medido	172	Estimado	Nivel Primario			Si	Comunitario(sin nexo epidemiol√≥gico)	Complete	No	No	No	No	No	No	No	No	No	No	No	No	No	No	No	No	No	No	No	No	No	No	No	No	No	No	No		Complete
4-38	h_italiano		Hospital Italiano de Buenos Aires	31	22056	Internado	22056	Sala	Fem.	A. Blanca	65	Estimado	165	Estimado				Si	Personal salud	Complete	No	No	No	No	No	No	No	No	No	No	No	No	No	No	No	No	No	Si	No	No	No	No	No	No	No	No	No		Complete
4-39	h_italiano		Hospital Italiano de Buenos Aires	50	22057	Internado	22057	Sala	Masc.	A. Blanca	80	Estimado	175	Estimado				Si	Contacto estrecho	Complete	No	No	No	No	No	No	No	No	No	No	No	No	No	No	No	No	No	No	No	No	No	No	No	No	No	No	No		Complete
4-40	h_italiano		Hospital Italiano de Buenos Aires / CABA	26	22050	Ambulatorio		Sala	Fem.	A. Blanca	66	Estimado	171	Estimado		1		Si	Comunitario(sin nexo epidemiol√≥gico)	Complete	No	No	No	No	No	No	No	No	No	No	No	No	No	No	No	No	No	No	No	No	No	No	No	No	No	No	No		Complete
4-41	h_italiano		Hospital Italiano de Buenos Aires	36	22058	Ambulatorio		Sala	Fem.	A. Blanca	60	Estimado	165	Estimado				Si	Contacto estrecho	Complete	No	No	No	No	No	No	No	No	No	No	No	No	No	No	No	No	No	No	No	No	No	No	No	No	No	No	No		Complete
4-42	h_italiano		Hospital Italiano de Buenos Aires / CABA	44	22052	Ambulatorio		Sala	Masc.	A. Blanca								Si	Contacto estrecho	Complete	Si	No	No	No	No	No	No	No	No	No	No	No	No	No	No	No	No	No	No	No	No	No	No	No	No	No	No		Complete
4-43	h_italiano		Hospital Italiano de Buenos Aires	50	22058	Internado	22058	Sala	Masc.	A. Blanca	80	Estimado	175	Estimado			Si		Personal salud	Complete	No	No	No	No	No	No	No	No	No	No	No	No	No	No	No	No	No	No	No	Si	No	No	No	No	No	No	No	1051	Complete
4-44	h_italiano		Hospital Italiano de Buenos Aires / CABA	52	22054	Ambulatorio		Sala	Masc.	A. Blanca			181	Estimado		3		Si	Comunitario(sin nexo epidemiol√≥gico)	Complete	No	No	No	No	No	No	No	No	No	No	No	No	No	No	No	No	No	No	No	No	No	No	No	No	No	No	No		Complete
4-45	h_italiano		Hospital Italiano de Buenos Aires / CABA	22	22054	Ambulatorio		Sala	Masc.	A. Blanca	73	Estimado	171	Estimado		1		Si	Comunitario(sin nexo epidemiol√≥gico)	Complete	No	No	No	No	No	No	No	No	No	No	No	No	No	No	No	No	No	No	No	No	No	No	No	No	No	No	No		Complete
4-46	h_italiano		Hospital Italiano de Buenos Aires / CABA	39	22054	Ambulatorio		Sala	Masc.	A. Blanca	88.2	Estimado	169	Estimado				Si	Contacto estrecho	Complete	No	No	No	No	No	No	No	No	No	No	No	No	No	No	No	No	No	No	No	No	No	No	No	No	No	No	No		Complete
4-48	h_italiano		Hospital Italiano de Buenos Aires / CABA	52	22055	Ambulatorio		Sala	Fem.	A. Blanca	61	Estimado	147	Estimado	Nivel Universitario completo	1		Si	Personal salud	Complete	No	No	No	No	No	No	No	No	No	Si	No	No	No	No	No	No	No	No	No	No	No	No	No	No	No	No	No		Complete
6-6	h_santojanni		Santojanni	82	22042	Internado	22042	Sala	Masc.	A. Blanca	70	Estimado	170	Estimado			Si	No	Contacto estrecho	Complete	Si	No	No	No	No	No	No	Si	No	No	No	No	No	No	No	No	No	No	Si	No	No	No	No	No	No	Si	No		Complete
6-14	h_santojanni		Santojanni	22	22084	Internado	22084	Sala	Masc.	A. Blanca	65	Estimado	160	Estimado	Nivel Secundario	3	No	No	Comunitario(sin nexo epidemiol√≥gico)	Complete	No	No	No	No	No	No	No	No	No	No	No	No	No	No	No	No	No	No	No	No	No	No	No	No	No	No	No		Complete
6-15	h_santojanni		Santojanni	35	22063	Internado	22063	Sala	Fem.	D. Pueblo originario	100	Estimado	160	Estimado	Nivel Secundario		No	No	Comunitario(sin nexo epidemiol√≥gico)	Complete	No	Si	No	No	No	No	No	No	No	No	No	Si	No	No	No	No	Si	No	No	No	No	No	No	No	No	No	No		Complete
6-17	h_santojanni		Santojanni	55	22069	Internado	22069	Terapia	Masc.										Contacto estrecho	Complete	Si	No	No	No	No	No	No	No	No	No	No	Si	No	No	No	No	No	No	No	No	No	No	No	No	No	No	No		Complete
6-34	h_santojanni		Santojanni	28	22068	Internado	22067	Sala	Fem.	A. Blanca	76	Estimado	1.55	Estimado	Nivel Secundario	2	No	No	Comunitario(sin nexo epidemiol√≥gico)	Complete	No	No	No	No	No	No	No	No	No	No	No	Si	No	No	No	No	No	No	No	No	No	No	No	No	No	No	No		Complete
6-36	h_santojanni		Santojanni	58	22069	Internado	22069	Sala	Fem.	A. Blanca									Comunitario(sin nexo epidemiol√≥gico)	Complete	No	No	No	No	No	No	No	No	No	No	No	No	No	No	No	No	No	No	No	No	No	No	No	No	No	No	No		Complete
6-37	h_santojanni		Santojanni	87	22063	Internado	22063	Sala	Fem.	A. Blanca							No	No	Contacto estrecho	Complete	Si	No	No	No	No	Si	No	No	No	No	No	No	No	No	No	No	No	No	No	No	No	No	No	No	No	No	No		Complete
6-39	h_santojanni		Santojanni	64	22071	Internado	22071	Sala	Masc.	A. Blanca	95	Estimado	1.78	Estimado	Nivel Primario	10	No	No	Comunitario(sin nexo epidemiol√≥gico)	Complete	Si	Si	No	No	No	No	No	No	No	No	No	Si	No	No	No	No	No	No	Si	No	No	No	No	No	No	No	No		Complete
6-40	h_santojanni		Santojanni	76	22062	Internado	22062	Sala	Masc.	A. Blanca	68	Medido	1.73	Medido					Comunitario(sin nexo epidemiol√≥gico)	Complete	Si	No	Si	Si	No	No	No	No	No	No	No	No	Si	No	No	No	No	No	No	No	Si	No	No	No	No	Si	No		Complete
6-43	h_santojanni		Santojanni	35	22073	Internado	22073	Sala	Masc.	A. Blanca							No	No	Contacto estrecho	Complete	No	No	No	No	No	No	No	No	No	No	No	Si	No	No	No	No	No	No	Si	No	No	No	No	No	No	No	No		Complete
6-45	h_santojanni		Santojanni	48	22074	Internado	22074	Sala	Masc.	A. Blanca							No	No	Comunitario(sin nexo epidemiol√≥gico)	Complete	No	No	No	No	No	No	No	No	No	No	No	No	No	No	No	No	No	No	No	No	No	No	No	No	No	No	No		Complete
6-47	h_santojanni		Santojanni	69	22073	Internado	22073	Sala	Fem.	D. Pueblo originario	90	Estimado	1.65	Estimado	Nivel Primario	2	No	No	Contacto estrecho	Complete	Si	Si	No	No	No	No	No	No	No	No	No	Si	No	No	No	No	No	No	No	No	No	No	No	No	No	No	No		Complete
6-48	h_santojanni		Santojanni	63	22040	Internado	22040	Sala	Fem.	A. Blanca	85	Estimado	155	Estimado	Nivel Secundario	10	No	No	Contacto estrecho	Complete	Si	No	No	No	No	No	No	No	No	No	No	No	No	No	No	No	No	No	No	No	No	No	No	No	No	No	No		Complete
6-67	h_santojanni		Santojanni	19	22035	Internado	22035	Sala	Fem.	A. Blanca	70	Estimado	160	Estimado	Nivel Secundario	4	No	No	Comunitario(sin nexo epidemiol√≥gico)	Complete	No	No	No	No	No	No	No	No	No	No	No	No	No	No	No	No	No	No	No	No	No	No	No	Si	No	No	No		Complete
6-68	h_santojanni		Santojanni	57	22035	Internado	22035	Sala	Masc.								No	No	Comunitario(sin nexo epidemiol√≥gico)	Complete	No	No	No	No	No	No	No	No	No	No	No	No	No	No	No	No	No	Si	No	No	Si	No	No	No	No	No	No		Complete
6-70	h_santojanni		Santojanni	82	22042	Internado	22042	Sala	Masc.	A. Blanca							No	No	Contacto estrecho	Complete	Si	No	No	No	No	No	No	Si	No	No	No	No	No	No	No	No	No	No	Si	No	No	No	No	No	No	Si	No		Complete
8-1	h_m_quiroga		HMQ	69	22163	Internado	22163	Sala	Masc.	A. Blanca	80	Medido	173	Medido	Nivel Secundario	0	Si	Si	Contacto estrecho	Complete	Si	No	No	No	No	No	No	No	No	No	No	No	No	No	No	No	No	No	No	No	No	No	No	No	No	No	No		Complete
8-2	h_m_quiroga		HMQ	83	22151	Internado	22151	Sala	Fem.	A. Blanca	68	Medido	160	Medido	Nivel Primario	2	Si	No	Contacto estrecho	Complete	Si	No	No	No	No	No	Si	No	No	No	No	No	No	No	No	No	No	No	No	No	No	No	No	No	No	No	No		Complete
8-3	h_m_quiroga		HMQ	77	22151	Internado	22151	Sala	Fem.	A. Blanca	61	Estimado	156	Medido	Nivel Primario	18	Si		Contacto estrecho	Complete	Si	No	Si	No	No	No	No	No	No	No	No	No	No	No	No	No	No	No	No	No	No	No	No	No	No	No	No		Complete
8-4	h_m_quiroga		HMQ	63	22152	Internado	22152	Sala	Masc.	A. Blanca	130	Medido	180	Medido	Nivel Secundario	1	No		Caso importado	Complete	Si	No	Si	No	No	No	No	No	No	No	No	Si	No	No	No	No	No	No	No	No	No	No	No	No	No	No	No		Complete
8-5	h_m_quiroga		HMQ	88	22152	Internado	22152	Sala	Fem.	A. Blanca	82	Medido	156	Medido	Nivel Secundario	18	Si		Contacto estrecho	Complete	No	Si	No	No	No	No	No	No	No	No	No	Si	No	No	No	No	Si	No	No	No	No	No	No	No	No	No	No		Complete
8-8	h_m_quiroga		HMQ	81	22153	Internado	22153	Sala	Fem.	A. Blanca	65	Estimado	150	Estimado		18	Si		Contacto estrecho	Complete	No	No	No	No	No	No	Si	No	No	No	No	No	No	No	No	No	No	No	No	No	No	No	No	No	No	No	No		Complete
8-10	h_m_quiroga		HMQ	72	22161	Internado	22161	Sala	Masc.	A. Blanca	90	Medido	175	Medido	Nivel Terciario	0	Si	Si	Comunitario(sin nexo epidemiol√≥gico)	Complete	Si	No	No	No	No	No	No	No	No	No	No	No	No	No	No	No	No	No	No	No	No	No	No	No	No	No	No		Complete
8-11	h_m_quiroga		HMQ	50	22156	Internado	22162	Sala	Masc.	A. Blanca	140	Estimado	180	Estimado	Nivel Primario	6	Si	No	Comunitario(sin nexo epidemiol√≥gico)	Complete	No	No	No	No	No	No	No	No	No	No	No	Si	No	No	No	No	No	No	No	No	No	No	No	No	No	No	No		Complete
8-12	h_m_quiroga		HMQ	50	22158	Internado	22162	Sala	Fem.	A. Blanca									Contacto estrecho	Complete	No	No	No	No	No	No	No	No	No	No	No	No	No	No	No	No	No	No	No	No	No	No	No	Si	No	No	No		Complete
8-14	h_m_quiroga		HMQ	46	22155	Internado	22165	Sala	Fem.	A. Blanca	80	Medido	168	Medido	Nivel Terciario	4	Si		Contacto estrecho	Complete	No	Si	No	No	No	No	No	No	No	No	No	No	No	No	No	No	Si	No	No	No	No	No	No	No	No	No	No		Complete
8-15	h_m_quiroga		HDGR	43	22040	Internado	22040	Terapia	Masc.	A. Blanca	100	Estimado	175	Estimado	Nivel Secundario	5	Si		Caso importado	Complete	Si	No	No	No	No	No	No	No	No	No	No	Si	No	No	No	No	No	Si	No	No	No	No	No	No	No	No	No		Complete
8-16	h_m_quiroga		HDGR	42	22052	Internado	22052	Sala	Fem.	A. Blanca	70	Estimado	172	Estimado	Nivel Universitario completo	2	Si		Contacto estrecho	Complete	No	No	No	No	No	No	No	No	No	No	No	No	No	No	No	No	No	No	No	No	No	No	No	No	No	No	No		Complete
8-17	h_m_quiroga		HDGR	63	22054	Internado	22061	Terapia	Masc.	A. Blanca	70	Medido	165	Medido	Nivel Universitario completo	2	Si		Contacto estrecho	Complete	Si	No	No	No	No	No	No	No	No	No	No	No	No	No	No	No	No	No	No	No	No	No	No	No	No	No	No		Complete
8-18	h_m_quiroga		HDGR	51	22145	Internado	22147	Terapia	Fem.	A. Blanca	78	Estimado	170	Estimado	Nivel Primario	3	Si		Comunitario(sin nexo epidemiol√≥gico)	Complete	Si	No	No	No	No	No	No	No	No	No	No	Si	No	No	No	No	Si	No	No	No	No	No	No	No	No	No	No		Complete
8-23	h_m_quiroga		HDGR	51	22159	Internado	22159	Sala	Masc.	A. Blanca	88	Estimado	185	Estimado	Nivel Terciario	4	Si		Comunitario(sin nexo epidemiol√≥gico)	Complete	No	No	No	No	No	No	No	No	No	No	No	No	No	No	No	No	No	No	No	No	No	No	No	No	No	No	No		Complete
8-24	h_m_quiroga		HDGR	53	22162	Internado	22162	Terapia	Fem.	A. Blanca	80	Estimado	156	Estimado	Nivel Secundario	4	Si		Comunitario(sin nexo epidemiol√≥gico)	Complete	Si	No	No	No	No	No	No	No	No	No	No	No	No	No	No	No	No	No	No	No	No	No	No	No	No	No	No		Complete
8-26	h_m_quiroga		Hospital Rawson San Juan	65	22153	Internado	22156	Terapia	Masc.	A. Blanca	80	Medido	180	Medido	Nivel Universitario completo	1	Si	No	Contacto estrecho	Complete	No	No	No	No	No	No	No	No	No	No	No	No	No	No	No	No	No	Si	Si	No	No	No	No	No	No	No	No		Complete
8-30	h_m_quiroga		HDGR	79	22150	Internado	22150	Sala	Fem.	A. Blanca	85	Estimado	150	Estimado	Nivel Secundario	1	Si		Comunitario(sin nexo epidemiol√≥gico)	Complete	Si	Si	No	No	No	No	No	No	No	No	No	No	No	No	No	No	No	No	No	No	No	No	No	No	No	No	No		Complete
8-33	h_m_quiroga		HDGR	38	22153	Internado	22155	Sala	Masc.	A. Blanca	95	Estimado	178	Estimado	Nivel Universitario incompleto	5	Si		Comunitario(sin nexo epidemiol√≥gico)	Complete	No	No	No	No	No	No	No	No	No	No	No	No	No	No	No	No	Si	No	No	No	No	No	No	No	No	No	No		Complete
8-34	h_m_quiroga		HDGR	33	22153	Internado	22153	Terapia	Masc.	A. Blanca	91	Estimado	170	Estimado	Nivel Terciario	2	Si		Contacto estrecho	Complete	No	No	No	No	No	No	No	No	No	No	No	No	No	No	No	No	No	No	No	No	No	No	No	No	No	No	No		Complete
8-36	h_m_quiroga		HDGR	38	22155	Internado	22155	Sala	Masc.	A. Blanca	68	Estimado	165	Estimado	Nivel Secundario	9	No		Comunitario(sin nexo epidemiol√≥gico)	Complete	No	No	No	No	No	No	No	No	No	No	No	No	No	No	No	No	No	No	No	No	No	No	No	No	No	No	No		Complete
8-41	h_m_quiroga		HDGR	64	22172	Internado	22175	Terapia	Masc.	A. Blanca	90	Medido	180	Estimado	Nivel Universitario completo	3	Si		Contacto estrecho	Complete	Si	No	No	No	No	No	No	No	No	No	No	No	No	No	No	No	No	No	No	No	No	No	No	No	No	No	No		Complete
8-42	h_m_quiroga		HDGR	57	22162	Internado	22165	Terapia	Masc.	A. Blanca	98	Estimado	165		Nivel Secundario	1	Si	No	Contacto estrecho	Complete	Si	Si	No	No	No	No	No	No	No	No	No	No	No	No	No	No	No	No	No	No	No	No	No	No	No	Si	No		Complete
8-44	h_m_quiroga		HMQ	60	22179	Internado	22179	Sala	Masc.	A. Blanca	81	Estimado	169	Estimado	Nivel Primario	1	Si	No	Comunitario(sin nexo epidemiol√≥gico)	Complete	No	No	No	No	No	No	No	No	No	No	No	No	No	Si	No	No	Si	No	No	No	No	No	No	No	Si	No	No		Complete
8-45	h_m_quiroga		HMQ	28	22178	Internado	22178	Sala	Masc.	A. Blanca	73	Estimado	171	Estimado	Nivel Terciario	3	Si	No	Contacto estrecho	Complete	No	No	No	No	No	No	No	No	No	No	No	No	No	No	No	No	No	No	No	No	No	No	No	No	No	No	No		Complete
8-47	h_m_quiroga		HMQ	45	22159	Internado	22159	Terapia	Masc.	A. Blanca	89	Estimado	169	Estimado	Nivel Primario	3	Si	No	Comunitario(sin nexo epidemiol√≥gico)	Complete	No	No	No	No	No	No	No	No	No	No	No	Si	No	No	No	No	No	No	No	No	No	No	No	No	No	No	No		Complete
8-50	h_m_quiroga		HMQ	60	22185	Internado	22185	Terapia	Fem.	A. Blanca	84	Estimado	160	Estimado	Nivel Primario	2	Si	No	Comunitario(sin nexo epidemiol√≥gico)	Complete	No	No	No	No	No	No	No	No	No	No	No	No	No	No	No	No	No	Si	Si	No	No	No	No	No	No	No	No		Complete
8-51	h_m_quiroga		HMQ	81	22188	Internado	22188	Sala	Fem.	A. Blanca	58	Estimado	162	Estimado	Nivel Primario	5	Si	No	Contacto estrecho	Complete	No	No	No	No	No	No	No	No	No	No	No	No	No	No	No	No	No	No	No	No	No	No	No	No	No	No	No		Complete
8-52	h_m_quiroga		HMQ	63	22189	Internado	22189	Sala	Fem.	A. Blanca	85	Estimado	150	Estimado	Nivel Primario	5	No	No	Contacto estrecho	Complete	No	No	No	No	No	No	No	No	No	No	No	Si	No	No	No	No	No	No	No	No	No	No	No	No	No	No	No		Complete
8-53	h_m_quiroga		HMQ	93	22179	Internado	22192	Sala	Fem.	A. Blanca	60	Estimado	160	Estimado	Nivel Primario	18	Si	No	Contacto estrecho	Complete	Si	No	No	No	No	No	No	No	No	No	No	No	No	No	No	No	No	No	No	No	No	No	No	No	No	No	No		Complete
8-54	h_m_quiroga		HMQ	38	22168	Internado	22168	Sala	Fem.	A. Blanca	94	Estimado	170	Estimado	Nivel Primario	4	No	No	Comunitario(sin nexo epidemiol√≥gico)	Complete	No	No	No	No	Si	No	No	No	No	No	No	Si	No	No	No	No	No	No	No	No	No	No	No	No	No	No	No		Complete
8-56	h_m_quiroga		HMQ	51	22193	Internado	22193	Sala	Masc.	A. Blanca	127	Estimado	180	Estimado	Nivel Secundario	3	Si	No	Comunitario(sin nexo epidemiol√≥gico)	Complete	No	Si	No	No	No	No	No	No	No	No	No	Si	No	No	No	No	No	No	No	No	No	No	No	No	No	No	No		Complete
9-2	s_britanico		Sanatorio Britanico, Rosario, Santa Fe	74	22132	Internado	22131	Terapia	Masc.	A. Blanca	95	Estimado	1.63	Estimado	Nivel Secundario		Si	No	Contacto estrecho	Complete	Si	Si	No	No	No	Si	No	No	No	No	No	Si	No	No	No	No	No	No	Si	No	No	No	No	No	No	Si	No		Complete
9-4	s_britanico		Sanatorio Britanico, Rosario, Santa Fe	77	22124	Internado	22155	Terapia	Masc.	A. Blanca	79	Estimado	1.7	Estimado	Nivel Secundario	2	Si	No	Comunitario(sin nexo epidemiol√≥gico)	Complete	Si	Si	No	No	No	No	No	No	No	No	No	No	No	No	No	No	No	No	Si	No	No	No	No	No	No	No	No		Complete
10-29	h_central		Hospital Centralde Mendoza	60	22227	Internado	22237	Sala	Fem.	A. Blanca							Si	Si	Comunitario(sin nexo epidemiol√≥gico)	Complete	Si	Si	No	No	No	No	No	No	No	No	No	No	No	No	No	No	No	Si	No	No	No	No	No	Si	No	No	No		Complete
11-1	h_perrando		Perrando (Resistencia)	28	22031	Internado	22031	Guardia	Masc.	D. Pueblo originario	80	Estimado	170	Estimado	Nivel Primario	7	No	No	Comunitario(sin nexo epidemiol√≥gico)	Complete	No	No	No	No	No	No	No	No	No	No	No	Si	No	No	No	No	No	No	No	No	No	No	No	No	No	No	No		Complete
11-2	h_perrando		Perrando, Resistencia, Chaco	39	22074	Ambulatorio		Sala	Masc.	A. Blanca	96	Estimado	170	Estimado	Nivel Secundario	5	No		Comunitario(sin nexo epidemiol√≥gico)	Complete	Si	No	No	No	No	No	No	No	No	No	No	Si	No	No	No	No	No	No	No	No	No	No	No	No	No	No	No		Complete
11-3	h_perrando		Perrando, Resistencia, Chaco	68	22076	Ambulatorio		Sala	Masc.	A. Blanca	65	Estimado	175	Estimado	Nivel Terciario	3	Si	No	Comunitario(sin nexo epidemiol√≥gico)	Complete	Si	No	No	No	No	No	No	No	No	No	No	No	No	Si	No	No	No	No	No	No	No	No	No	No	No	No	No		Complete
11-4	h_perrando		Perrando, Resistencia, Chaco	40	22074	Ambulatorio		Sala	Masc.	A. Blanca	78	Estimado	175	Estimado	Nivel Secundario	5	No	No	Comunitario(sin nexo epidemiol√≥gico)	Complete	No	No	No	No	No	No	No	No	No	No	No	No	No	No	No	No	No	No	No	No	No	No	No	No	No	No	No		Complete
11-5	h_perrando		Perrando, Resistencia, Chaco	62	22074	Ambulatorio		Sala	Masc.	A. Blanca	65	Estimado	168	Estimado	Nivel Secundario	4	Si	No	Comunitario(sin nexo epidemiol√≥gico)	Complete	Si	Si	No	No	No	No	No	No	No	No	No	No	No	No	No	No	No	No	No	No	No	No	No	No	No	No	No		Complete
11-6	h_perrando		Perrando, Resistencia, Chaco	70	22081	Ambulatorio		Sala	Masc.	A. Blanca	70	Estimado	165	Estimado	Nivel Primario	6	Si	No	Comunitario(sin nexo epidemiol√≥gico)	Complete	Si	No	Si	No	No	No	No	No	No	No	No	Si	No	No	No	No	No	No	Si	No	No	No	No	No	No	No	No		Complete
11-7	h_perrando		Perrando, Resistencia, Chaco	65	22048	Ambulatorio		Sala	Fem.	A. Blanca	97	Estimado	172	Estimado	Nivel Primario	4	No	No	Comunitario(sin nexo epidemiol√≥gico)	Complete	No	No	No	No	No	No	No	No	No	No	No	Si	No	No	No	No	No	No	Si	No	No	No	No	No	No	No	No		Complete
11-8	h_perrando		Perrando, Resistencia, Chaco	46	22082	Ambulatorio		Sala	Masc.	A. Blanca	105	Estimado	180	Estimado	Nivel Primario	7	No	No	Comunitario(sin nexo epidemiol√≥gico)	Complete	Si	No	No	No	No	No	No	No	No	No	No	Si	No	No	No	No	No	No	Si	No	No	No	No	No	No	No	No		Complete
11-9	h_perrando		Perrando, Resistencia, Chaco	43	22082	Ambulatorio		Sala	Masc.	A. Blanca	120	Estimado	185	Estimado	Nivel Universitario completo	2	No	No	Personal salud	Complete	Si	No	No	No	No	No	No	No	No	No	No	Si	No	No	No	No	No	No	Si	No	No	No	No	No	No	No	No		Complete
11-10	h_perrando		Perrando, Resistencia, Chaco	56	22078	Ambulatorio		Sala	Fem.	D. Pueblo originario	90	Estimado	156	Estimado	Analfabeto	8	No	No	Conglomerado	Complete	Si	Si	No	No	No	No	No	No	No	No	No	Si	No	No	No	No	No	No	No	No	No	No	No	No	No	No	No		Complete
11-11	h_perrando		Perrando, Resistencia, Chaco	56	22083	Ambulatorio		Sala	Masc.	A. Blanca	105	Estimado	172	Estimado	Nivel Secundario	5	No	No	Comunitario(sin nexo epidemiol√≥gico)	Complete	No	No	No	No	No	No	No	No	No	No	No	Si	No	No	No	No	No	No	No	No	No	No	No	No	No	No	No		Complete
11-12	h_perrando		Perrando, Resistencia, Chaco	63	22083	Ambulatorio		Sala	Masc.	A. Blanca	75	Estimado	175	Estimado	Nivel Secundario	2	No	No	Comunitario(sin nexo epidemiol√≥gico)	Complete	Si	Si	No	Si	No	No	No	No	No	No	No	No	No	No	No	No	No	No	No	No	No	No	No	No	No	No	No		Complete
11-13	h_perrando		Perrando, Resistencia, Chaco	19	22083	Internado	22083	Guardia	Fem.	A. Blanca	65	Estimado	165	Estimado	Nivel Secundario	7	No	No	Comunitario(sin nexo epidemiol√≥gico)	Complete	No	No	No	No	No	No	No	No	No	No	No	No	No	No	No	No	No	No	No	No	No	No	No	No	No	No	Si		Complete
11-14	h_perrando		Perrando, Resistencia, Chaco	27	22083	Ambulatorio		Sala	Fem.	A. Blanca	98	Medido	163	Medido	Nivel Secundario	5	Si	No	Comunitario(sin nexo epidemiol√≥gico)	Complete	No	No	No	No	No	No	No	No	No	No	No	Si	No	No	No	No	No	No	No	No	No	No	No	Si	No	No	No		Complete
11-15	h_perrando		Perrando, Resistencia, Chaco	39	22084	Internado	22084	Sala	Fem.	A. Blanca	55	Medido	158	Medido	Nivel Secundario	6	Si	No	Comunitario(sin nexo epidemiol√≥gico)	Complete	No	No	No	No	No	No	No	No	No	No	No	No	No	No	No	No	No	No	No	No	No	No	No	No	No	No	No		Complete
11-16	h_perrando		Perrando, Resistencia, Chaco	54	22082	Internado	22082	Sala	Fem.	A. Blanca	85	Estimado	165	Medido	Nivel Primario	5	Si	No	Comunitario(sin nexo epidemiol√≥gico)	Complete	Si	No	No	No	No	No	No	No	No	No	No	Si	No	No	No	No	No	No	No	No	No	No	No	No	No	No	No		Complete
11-17	h_perrando		Perrando, Resistencia, Chaco	58	22084	Internado	22084	Sala	Masc.		95	Estimado	170	Estimado	Nivel Secundario	6	No	No	Comunitario(sin nexo epidemiol√≥gico)	Complete	No	No	No	No	No	No	No	No	No	No	No	Si	No	No	No	No	No	No	Si	No	No	No	No	No	No	No	No		Complete
11-18	h_perrando		Perrando, Resistencia, Chaco	75	22086	Internado	22086	Sala	Fem.	A. Blanca	58	Medido	170	Medido	Nivel Secundario	4	Si	No	Contacto estrecho	Complete	Si	No	No	No	No	No	No	No	No	No	No	No	No	No	No	No	No	No	No	No	No	No	No	Si	No	No	No		Complete
11-19	h_perrando		Perrando, Resistencia, Chaco	27	22086	Ambulatorio		Sala	Masc.	A. Blanca	75	Estimado	175	Estimado	Nivel Secundario	6	No	No	Contacto estrecho	Complete	No	No	No	No	No	No	No	No	No	No	No	No	No	No	No	No	No	Si	No	No	No	No	No	No	No	No	No		Complete
11-20	h_perrando		Perrando, Resistencia, Chaco	19	22087	Internado	22087	Sala	Masc.	A. Blanca	90	Estimado	180	Estimado	Nivel Secundario	7	No	No	Contacto estrecho	Complete	No	No	No	No	No	No	No	No	No	No	No	No	No	No	No	No	No	No	No	No	No	No	No	No	No	No	No		Complete
11-21	h_perrando		Perrando, Resistencia, Chaco	52	22088	Internado	22088	Sala	Fem.	A. Blanca	80	Medido	165	Medido	Nivel Primario	4	No	No	Contacto estrecho	Complete	Si	Si	No	No	No	No	No	No	No	No	No	Si	No	No	No	No	No	No	No	No	No	No	No	No	No	No	No		Complete
11-22	h_perrando		Perrando, Resistencia, Chaco	47	22088	Internado	22088	Sala	Masc.	A. Blanca	78	Estimado	178	Estimado	Nivel Primario	10	No	No	Contacto estrecho	Complete	No	No	No	No	No	No	No	No	No	No	No	No	No	No	No	No	No	No	Si	No	No	No	No	No	No	No	No		Complete
11-23	h_perrando		Perrando, Resistencia, Chaco	67	22089	Internado	22089	Sala	Masc.	A. Blanca	97	Medido	175	Medido	Nivel Secundario	7	No	No	Contacto estrecho	Complete	Si	No	No	No	No	No	No	No	No	No	No	Si	No	No	No	No	No	No	Si	No	No	No	No	No	No	No	No		Complete
11-24	h_perrando		Perrando, Resistencia, Chaco	46	22088	Internado	22088	Sala	Masc.	A. Blanca	68	Medido	173	Medido	Nivel Primario	6	No	No	Comunitario(sin nexo epidemiol√≥gico)	Complete	No	No	No	No	No	No	No	No	No	No	No	No	No	No	No	No	No	No	No	No	No	No	No	No	No	No	No		Complete
11-25	h_perrando		Perrando, Resistencia, Chaco	67	22090	Internado	22090	Sala	Masc.	A. Blanca	80	Estimado	175	Estimado	Nivel Primario	4	No	No	Comunitario(sin nexo epidemiol√≥gico)	Complete	Si	No	No	No	No	Si	No	No	No	No	No	No	No	No	No	No	No	No	Si	No	No	No	No	No	No	No	No		Complete
11-26	h_perrando		Perrando, Resistencia, Chaco	51	22093	Internado	22093	Sala	Masc.	A. Blanca	85	Estimado	170	Estimado	Nivel Terciario	5	No	No	Conglomerado	Complete	Si	No	No	No	No	No	No	No	No	No	No	Si	No	No	No	No	No	No	Si	No	No	No	No	No	No	No	No		Complete
11-27	h_perrando		Perrando, Resistencia, Chaco	67	22093	Internado	22093	Sala	Fem.	A. Blanca	65	Estimado	170	Estimado	Nivel Secundario	4	Si	No	Contacto estrecho	Complete	Si	No	No	No	No	No	No	No	No	No	No	No	No	No	No	No	No	No	No	No	No	No	No	No	No	No	No		Complete
11-28	h_perrando		Perrando, Resistencia, Chaco	68	22092	Internado	22092	Sala	Fem.	A. Blanca	78	Estimado	168	Estimado	Nivel Primario	3	Si	No	Contacto estrecho	Complete	Si	No	No	No	No	No	No	No	No	No	No	Si	No	No	No	No	No	No	Si	No	No	No	No	No	No	No	No		Complete
11-29	h_perrando		Perrando, Resistencia, Chaco	55	22094	Internado	22094	Sala	Masc.	D. Pueblo originario	85	Estimado	175	Estimado	Analfabeto	7	No	No	Comunitario(sin nexo epidemiol√≥gico)	Complete	No	No	No	No	No	No	No	No	No	No	No	Si	No	No	No	No	No	Si	Si	No	No	No	No	No	No	No	No		Complete
11-30	h_perrando		Perrando, Resistencia, Chaco	45	22094	Internado	22094	Sala	Masc.	A. Blanca	80	Estimado	170	Estimado	Nivel Primario	8	No	No	Conglomerado	Complete	No	No	No	No	No	No	No	No	No	No	No	Si	No	No	No	No	No	No	Si	No	No	No	No	No	No	No	No		Complete
11-31	h_perrando		Perrando, Resistencia, Chaco	28	22095	Internado	22095	Terapia	Masc.	A. Blanca	65	Estimado	175	Estimado	Nivel Primario	8	No	No	Comunitario(sin nexo epidemiol√≥gico)	Complete	No	No	No	No	No	No	No	No	No	No	No	No	No	No	No	No	No	Si	No	No	No	No	No	No	No	No	No		Complete
11-32	h_perrando		Perrando, Resistencia, Chaco	56	22096	Internado	22096	Terapia	Fem.	A. Blanca	90	Estimado	160	Estimado	Nivel Primario	10	No	No	Comunitario(sin nexo epidemiol√≥gico)	Complete	Si	Si	No	Si	No	No	No	No	No	No	No	Si	No	No	No	No	No	No	No	No	No	No	No	No	No	No	No		Complete
11-33	h_perrando		Perrando, Resistencia, Chaco	70	22096	Internado	22096	Sala	Fem.	D. Pueblo originario	85	Estimado	160	Estimado	Analfabeto	12	No	No	Conglomerado	Complete	Si	Si	No	No	No	No	No	No	No	No	No	Si	No	No	No	No	No	No	Si	No	No	No	No	No	No	No	No		Complete
11-34	h_perrando		Perrando, Resistencia, Chaco	48	22094	Internado	22094	Sala	Masc.	A. Blanca	75	Estimado	170	Estimado	Nivel Secundario	4	Si	No	Comunitario(sin nexo epidemiol√≥gico)	Complete	No	No	No	No	No	No	No	No	No	No	No	No	No	No	No	No	No	No	No	No	No	No	No	No	No	No	No		Complete
11-35	h_perrando		Perrando, Resistencia, Chaco	40	22096	Internado	22096	Sala	Fem.	A. Blanca	65	Estimado	165	Estimado	Nivel Secundario	6	No	No	Conglomerado	Complete	No	No	No	No	No	No	No	No	No	No	No	No	No	No	No	No	No	No	No	No	No	No	No	No	No	No	Si		Complete
11-36	h_perrando		Perrando, Resistencia, Chaco	79	22097	Internado	22097	Sala	Fem.	A. Blanca	86	Medido	162	Medido	Nivel Primario	7	No	No	Contacto estrecho	Complete	Si	No	No	No	No	No	No	No	No	No	No	Si	No	No	No	No	No	No	Si	No	No	No	No	No	No	No	No		Complete
11-37	h_perrando		Perrando, Resistencia, Chaco	39	22099	Internado	22099	Terapia	Masc.	A. Blanca	95	Estimado	175	Estimado	Nivel Secundario	5	No	No	Contacto estrecho	Complete	Si	Si	No	No	No	No	No	No	No	No	No	Si	No	No	No	No	No	No	No	No	No	No	No	No	No	No	No		Complete
11-38	h_perrando		Perrando, Resistencia, Chaco	39	22099	Internado	22099	Sala	Fem.	A. Blanca	80	Estimado	165	Estimado	Analfabeto	8	No	No	Conglomerado	Complete	No	No	No	No	No	No	No	No	No	No	No	Si	No	No	No	No	No	No	No	No	No	No	No	Si	No	No	No		Complete
11-39	h_perrando		Perrando, Resistencia, Chaco	39	22099	Internado	22099	Sala	Masc.	A. Blanca	97	Medido	173	Medido	Nivel Secundario	6	No	No	Conglomerado	Complete	No	No	No	No	No	No	No	No	No	No	No	Si	No	No	No	No	No	No	No	No	No	No	No	No	No	No	No		Complete
11-41	h_perrando		Perrando, Resistencia, Chaco	78	22100	Internado	22100	Sala	Fem.	A. Blanca	75	Estimado	165	Estimado	Nivel Primario	3	No	No	Conglomerado	Complete	Si	Si	No	No	No	No	No	No	No	No	No	Si	No	No	No	No	No	No	No	No	No	No	No	Si	No	No	No		Complete
11-42	h_perrando		Perrando, Resistencia, Chaco	51	22100	Internado	22100	Sala	Fem.	A. Blanca	80	Estimado	160	Estimado	Nivel Primario	8	No	No	Conglomerado	Complete	Si	Si	No	No	No	No	No	No	No	No	No	Si	No	No	No	No	No	No	No	No	No	No	No	No	No	No	No		Complete
11-43	h_perrando		Perrando, Resistencia, Chaco	51	22100	Internado	22100	Sala	Fem.	A. Blanca	68	Medido	155	Medido	Nivel Primario	9	No	No	Conglomerado	Complete	Si	Si	No	No	No	No	No	No	No	No	No	Si	No	No	No	No	No	No	No	No	No	No	No	No	No	No	No		Complete
11-44	h_perrando		Perrando, Resistencia, Chaco	53	22102	Internado	22102	Sala	Fem.	A. Blanca	70	Estimado	160	Estimado	Nivel Primario	8	No	No	Conglomerado	Complete	Si	Si	No	No	No	No	No	No	No	No	No	Si	No	No	No	No	No	No	No	No	No	No	No	No	No	No	No		Complete
11-45	h_perrando		Perrando, Resistencia, Chaco	58	22100	Internado	22100	Sala	Masc.	A. Blanca	90	Estimado	175	Estimado	Nivel Primario	6	No	No	Conglomerado	Complete	No	No	No	No	No	No	No	No	No	No	No	Si	No	No	No	No	No	No	No	No	No	No	No	No	No	No	No		Complete
11-46	h_perrando		Perrando, Resistencia, Chaco	86	22102	Internado	22102	Sala	Masc.	A. Blanca	75	Estimado	180	Estimado	Nivel Primario	6	No	No	Conglomerado	Complete	Si	No	No	No	No	Si	Si	No	No	No	No	No	No	No	No	No	No	No	Si	No	No	No	No	No	No	No	No		Complete
11-47	h_perrando		Perrando, Resistencia, Chaco	60	22101	Internado	22101	Sala	Fem.	A. Blanca	78	Medido	163	Medido	Nivel Primario	3	No	No	Comunitario(sin nexo epidemiol√≥gico)	Complete	Si	Si	No	No	Si	No	No	No	No	No	No	Si	No	No	No	No	No	No	No	No	No	No	No	No	No	Si	No		Complete
11-48	h_perrando		Perrando, Resistencia, Chaco	62	22104	Internado	22104	Sala	Fem.	A. Blanca	95	Estimado	165	Estimado	Nivel Primario	5	No	No	Contacto estrecho	Complete	Si	Si	No	No	No	No	No	No	No	No	No	Si	No	No	No	No	No	No	No	No	No	No	No	No	No	No	No		Complete
11-49	h_perrando		Perrando, Resistencia, Chaco	50	22104	Internado	22104	Sala	Masc.	A. Blanca	80	Estimado	175	Estimado	Nivel Terciario	4	Si	No	Comunitario(sin nexo epidemiol√≥gico)	Complete	Si	No	No	No	No	No	No	No	No	No	No	Si	No	No	No	No	No	No	Si	No	No	No	No	No	No	No	No		Complete
11-50	h_perrando		Perrando, Resistencia, Chaco	67	22105	Internado	22105	Sala	Masc.	A. Blanca	95	Estimado	170	Estimado	Nivel Primario	5	No	No	Contacto estrecho	Complete	Si	No	No	No	No	No	No	No	No	No	No	Si	No	No	No	No	No	No	No	No	No	No	No	No	No	No	No		Complete
11-51	h_perrando		Perrando, Resistencia, Chaco	65	22106	Internado	22106	Sala	Masc.	A. Blanca	75	Estimado	185	Estimado	Nivel Secundario	4	No	No	Contacto estrecho	Complete	No	No	No	No	No	No	No	No	No	No	No	No	No	No	No	No	No	No	No	No	No	No	No	No	No	No	No		Complete
11-52	h_perrando		Perrando, Resistencia, Chaco	65	22106	Internado	22106	Sala	Masc.	A. Blanca	68	Medido	175	Medido	Nivel Primario	5	No	No	Comunitario(sin nexo epidemiol√≥gico)	Complete	Si	No	No	No	No	No	No	Si	No	No	No	No	No	No	No	No	No	No	Si	No	No	No	No	No	No	No	No		Complete
11-54	h_perrando		Perrando, Resistencia, Chaco	53	22107	Internado	22107	Sala	Masc.	A. Blanca	65	Estimado	170	Estimado	Nivel Secundario	3	Si	No	Comunitario(sin nexo epidemiol√≥gico)	Complete	Si	Si	No	No	No	No	No	No	No	No	No	No	No	No	No	No	No	No	No	No	No	Si	No	No	No	No	No		Complete
11-55	h_perrando		Perrando, Resistencia, Chaco	30	22109	Internado	22109	Sala	Masc.	A. Blanca	95	Estimado	170	Estimado	Nivel Secundario	8	No	No	Contacto estrecho	Complete	No	No	No	No	No	No	No	No	No	No	No	Si	No	No	No	No	No	No	No	No	No	No	No	No	No	No	No		Complete
11-56	h_perrando		Perrando, Resistencia, Chaco	63	22109	Internado	22140	Sala	Masc.	A. Blanca	75	Estimado	175	Estimado	Nivel Primario	5	No	No	Contacto estrecho	Complete	Si	No	No	No	No	No	No	No	No	No	No	No	No	No	No	No	No	No	Si	No	No	No	No	No	No	No	No		Complete
11-57	h_perrando		Perrando, Resistencia, Chaco	56	22104	Internado	22104	Sala	Masc.	A. Blanca	90	Estimado	170	Estimado	Nivel Primario	6	No	No	Comunitario(sin nexo epidemiol√≥gico)	Complete	No	No	No	No	No	No	No	No	No	No	No	Si	No	No	No	No	No	No	No	No	No	No	No	No	No	No	No		Complete
11-58	h_perrando		Perrando, Resistencia, Chaco	49	22108	Internado	22108	Sala	Masc.	A. Blanca	80	Estimado	175	Estimado	Nivel Secundario	6	No	No	Contacto estrecho	Complete	Si	No	No	No	No	No	No	No	No	No	No	Si	No	No	No	No	No	No	No	No	No	No	No	No	No	No	No		Complete
11-59	h_perrando		Perrando, Resistencia, Chaco	83	22110	Internado	22110	Sala	Fem.	B. Negra	90	Estimado	165	Estimado	Nivel Primario	8	Si	No	Contacto estrecho	Complete	Si	No	No	No	No	No	No	No	No	No	No	Si	No	No	No	No	No	No	No	No	No	No	No	No	No	No	No		Complete
11-60	h_perrando		Perrando, Resistencia, Chaco	51	22108	Internado	22108	Sala	Masc.	A. Blanca	68	Estimado	175	Estimado	Nivel Secundario	4	No	No	Contacto estrecho	Complete	Si	No	No	No	No	No	No	No	No	No	No	No	No	No	No	No	No	No	No	No	No	No	No	No	No	No	No		Complete
11-61	h_perrando		Perrando, Resistencia, Chaco	63	22110	Internado	22110	Sala	Masc.	B. Negra	65	Estimado	175	Estimado	Nivel Secundario	4	No	No	Comunitario(sin nexo epidemiol√≥gico)	Complete	Si	Si	No	No	Si	No	No	No	No	No	No	No	No	No	No	No	No	No	No	No	No	No	No	No	No	No	No		Complete
11-62	h_perrando		Perrando, Resistencia, Chaco	54	22110	Internado	22110	Sala	Masc.	B. Negra	85	Estimado	170	Estimado	Nivel Terciario	5	Si	No	Comunitario(sin nexo epidemiol√≥gico)	Complete	Si	Si	No	No	No	No	No	No	No	No	No	Si	No	No	No	No	No	No	No	No	No	No	No	No	No	No	No		Complete
11-63	h_perrando		Perrando, Resistencia, Chaco	61	22110	Internado	22110	Sala	Fem.	B. Negra	58	Estimado	165	Estimado	Nivel Primario	6	No	No	Contacto estrecho	Complete	No	No	No	No	No	No	No	No	No	No	No	No	No	No	No	No	No	No	No	No	No	No	No	Si	No	No	No		Complete
11-64	h_perrando		Perrando, Resistencia, Chaco	60	22106	Internado	22106	Guardia	Fem.	A. Blanca	80	Estimado	165	Estimado	Nivel Primario	4	No	No	Comunitario(sin nexo epidemiol√≥gico)	Complete	Si	No	No	No	No	No	No	No	No	No	No	Si	No	No	No	No	No	No	No	No	No	No	No	No	No	Si	No		Complete
11-65	h_perrando		Perrando, Resistencia, Chaco	79	22112	Internado	22112	Sala	Masc.	D. Pueblo originario	90	Estimado	170	Estimado	Analfabeto	8	Si	No	Contacto estrecho	Complete	Si	Si	No	Si	No	No	No	No	No	No	No	Si	No	No	No	No	No	No	Si	No	No	No	No	No	No	No	No		Complete
11-66	h_perrando		Perrando, Resistencia, Chaco	76	22115	Internado	22115	Terapia	Masc.	A. Blanca	63	Estimado	170	Estimado	Nivel Primario	4	No	No	Contacto estrecho	Complete	Si	No	No	No	No	No	No	No	No	No	No	No	No	No	No	No	No	No	Si	No	No	No	No	No	No	No	No		Complete
11-67	h_perrando		Perrando, Resistencia, Chaco	66	22113	Internado	22113	Sala	Fem.	A. Blanca	75	Estimado	165	Estimado	Nivel Primario	6	Si	No	Contacto estrecho	Complete	Si	Si	No	No	No	No	No	No	Si	No	No	Si	No	No	No	No	No	No	No	No	No	No	No	No	No	No	No		Complete
11-68	h_perrando		Perrando, Resistencia, Chaco	66	22116	Internado	22116	Sala	Fem.	D. Pueblo originario	95	Estimado	165	Estimado	Analfabeto	8	Si	No	Contacto estrecho	Complete	Si	No	No	No	No	No	No	No	No	No	No	Si	No	No	No	No	No	No	No	No	No	No	No	No	No	No	No		Complete
11-69	h_perrando		Perrando, Resistencia, Chaco	48	22113	Internado	22113	Sala	Fem.	A. Blanca	60	Estimado	165	Estimado	Nivel Secundario	4	Si	No	Contacto estrecho	Complete	No	No	No	No	No	No	No	No	No	No	No	No	No	No	No	No	No	No	Si	No	No	No	No	No	No	No	No		Complete
11-70	h_perrando		Perrando, Resistencia, Chaco	58	22115	Internado	22115	Sala	Masc.	A. Blanca	75	Estimado	175	Estimado	Nivel Primario	4	No	No	Comunitario(sin nexo epidemiol√≥gico)	Complete	No	No	No	No	No	No	No	No	No	No	No	No	No	No	No	No	No	No	No	No	No	No	No	No	No	No	No		Complete
11-71	h_perrando		Perrando, Resistencia, Chaco	92	22115	Internado	22115	Sala	Masc.	A. Blanca	70	Estimado	175	Estimado	Nivel Primario	3	Si	No	Contacto estrecho	Complete	No	No	No	No	No	No	No	No	No	No	No	No	No	No	No	No	No	No	Si	No	No	No	No	No	No	No	No		Complete
11-72	h_perrando		Perrando, Resistencia, Chaco	33	22116	Internado	22116	Sala	Masc.	D. Pueblo originario	75	Estimado	180	Estimado	Nivel Primario	8	No	No	Comunitario(sin nexo epidemiol√≥gico)	Complete	No	No	No	No	No	No	No	No	No	No	No	Si	No	No	No	No	No	No	No	No	No	No	No	No	No	No	No		Complete
11-73	h_perrando		Perrando, Resistencia, Chaco	56	22117	Internado	22117	Sala	Masc.	A. Blanca	85	Estimado	170	Estimado	Nivel Universitario incompleto	4	Si	No	Contacto estrecho	Complete	Si	No	No	No	No	No	No	No	No	No	No	Si	No	No	No	No	No	No	No	No	No	No	No	No	No	No	No		Complete
11-74	h_perrando		Perrando, Resistencia, Chaco	67	22114	Internado	22114	Sala	Masc.	D. Pueblo originario	75	Estimado	170	Estimado	Analfabeto	7	Si	No	Contacto estrecho	Complete	Si	No	No	No	No	No	No	No	No	No	No	Si	No	No	No	No	No	No	No	No	No	No	No	No	No	No	No		Complete
11-75	h_perrando		Perrando, Resistencia, Chaco	72	22117	Internado	22117	Sala	Masc.	D. Pueblo originario	65	Estimado	170	Estimado	Analfabeto	6	Si	No	Contacto estrecho	Complete	Si	No	Si	No	No	No	No	No	No	No	No	No	No	No	No	No	No	No	Si	No	No	No	No	No	No	No	No		Complete
11-76	h_perrando		Perrando, Resistencia, Chaco	49	22117	Internado	22117	Sala	Masc.	A. Blanca	95	Estimado	175	Estimado	Nivel Secundario	4	Si	No	Contacto estrecho	Complete	Si	No	No	No	No	No	No	No	No	No	No	Si	No	No	No	No	No	No	No	No	No	No	No	No	No	No	No		Complete
11-77	h_perrando		Perrando, Resistencia, Chaco	69	22116	Internado	22116	Sala	Fem.	A. Blanca	85	Estimado	165	Estimado	Nivel Primario	5	No	No	Comunitario(sin nexo epidemiol√≥gico)	Complete	Si	Si	No	No	No	No	No	No	No	No	No	Si	No	No	No	No	No	No	No	No	No	No	No	Si	No	No	No		Complete
11-78	h_perrando		Perrando, Resistencia, Chaco	53	22117	Internado	22117	Sala	Masc.	A. Blanca	65	Estimado	175	Estimado	Nivel Secundario	5	No	No	Comunitario(sin nexo epidemiol√≥gico)	Complete	No	No	No	No	No	No	No	No	No	No	No	No	No	No	No	No	No	Si	No	No	No	No	No	No	No	No	No		Complete
11-79	h_perrando		Perrando, Resistencia, Chaco	54	22117	Internado	22117	Sala	Masc.	A. Blanca	80	Estimado	170	Estimado	Nivel Secundario	5	Si	No	Contacto estrecho	Complete	No	No	No	No	No	No	No	No	No	No	No	Si	No	No	No	No	No	No	No	No	No	No	No	No	No	No	No		Complete
12-3	h_centenario		Centenario, Gualeguaych√É¬∫, Entre R√É¬≠os	38	22035	Internado	22035	Sala	Fem.	A. Blanca	58	Estimado	165	Estimado	Nivel Secundario	2	Si	No	Contacto estrecho	Complete	No	No	No	No	No	No	No	No	No	No	No	No	No	No	No	No	No	No	No	No	No	No	No	No	No	No	No		Complete
12-4	h_centenario		Centenario, Gualeguaych√É¬∫, Entre R√É¬≠os	63	22105	Internado	22105	Sala	Masc.	A. Blanca	90	Medido	1.75	Medido	Nivel Terciario	2	Si	No	Contacto estrecho	Complete	Si	Si	No	No	No	No	No	No	No	No	No	Si	No	No	No	No	No	No	No	No	No	No	No	No	No	No	No		Complete
12-5	h_centenario		Centenario, Gualeguaych√É¬∫, Entre R√É¬≠os	50	22104	Ambulatorio		Sala	Masc.	A. Blanca					Nivel Universitario completo	4	Si	No	Contacto estrecho	Complete	No	No	No	No	No	No	No	No	No	No	No	No	No	No	No	No	No	No	No	No	No	No	No	No	No	No	No		Complete
18-2	h_interzonal_gonne		San Roque, Gonnet, La Plata, Bs.As	58	22136	Internado	22136	Sala	Fem.	A. Blanca							No	No	Comunitario(sin nexo epidemiol√≥gico)	Complete	No	Si	No	No	No	No	No	No	No	No	No	Si	No	No	No	No	No	No	No	No	No	No	No	No	No	No	No		Complete
19-3	h_italiano_la_plat		hospital italiano la plata, la plata, buenos aires	34	22008	Internado	22008	Sala	Fem.	A. Blanca	55	Estimado	1.6	Estimado	Nivel Universitario completo	2	Si	No	Comunitario(sin nexo epidemiol√≥gico)	Complete	No	No	No	No	No	No	No	No	No	No	No	No	No	No	No	No	No	No	No	No	No	No	No	No	No	No	No		Complete
20-9	h_nacional_a_posad		Hospital Nacional prof Alejandro Posadas	27	22077	Internado	22077	Sala	Masc.	A. Blanca	70	Estimado	1.7	Estimado	Nivel Secundario	1	Si	No	Contacto estrecho	Complete	No	No	No	No	No	No	No	No	No	No	No	No	No	No	No	No	No	No	No	No	No	No	No	No	No	No	No		Complete
20-18	h_nacional_a_posad		Hospital Posadas	54	22077	Ambulatorio		Sala	Masc.	A. Blanca	86	Estimado	1.59	Estimado	Nivel Secundario	1	No	No	Comunitario(sin nexo epidemiol√≥gico)	Complete	No	No	No	No	No	No	No	No	No	No	No	No	No	No	No	No	No	No	Si	No	No	No	No	No	No	No	No		Complete
20-29	h_nacional_a_posad		Hospital Posadas	65	22072	Internado	22097	Sala	Masc.	A. Blanca	93	Medido	179	Medido	Nivel Primario	3	No	No	Comunitario(sin nexo epidemiol√≥gico)	Complete	No	No	No	No	No	No	No	No	No	No	No	No	No	No	No	No	No	No	No	No	No	No	No	No	No	No	No		Complete
20-34	h_nacional_a_posad		Hospital Nacional Prof A. Posadas	53	22090	Internado	22090	Sala	Fem.	A. Blanca	80	Estimado	1.58	Estimado	Nivel Secundario	1	No	No	Contacto estrecho	Complete	Si	No	No	No	No	No	No	No	No	No	No	No	No	No	No	No	Si	No	No	No	No	No	No	No	No	No	No		Complete
20-56	h_nacional_a_posad		Posadas	43	22153	Internado	22153	Sala	Fem.	A. Blanca	119	Estimado	165	Estimado	Nivel Secundario	3	No	No	Comunitario(sin nexo epidemiol√≥gico)	Complete	No	No	No	No	No	No	No	No	No	No	No	Si	No	No	No	Si	No	No	No	No	No	No	No	No	Si	No	No		Complete
24-1	i_medico_platense		Instituto Medico Platense, La Plata Buenos Aires	86	22125	Internado	22125	Sala	Masc.	A. Blanca	85	Estimado	180	Estimado	Nivel Secundario	30	Si	No	Comunitario(sin nexo epidemiol√≥gico)	Complete	No	No	No	No	No	No	No	No	No	No	No	No	Si	No	No	No	No	No	No	No	No	No	No	No	No	No	No		Complete
24-2	i_medico_platense		Instituto Medico Platense La Plata Buenos Aires	69	22126	Internado	22126	Sala	Masc.	A. Blanca	97	Estimado	180	Estimado	Nivel Primario	3	Si	No	Contacto estrecho	Complete	Si	No	No	No	Si	No	No	No	No	No	No	Si	No	No	No	No	No	No	No	No	No	No	No	No	No	No	No		Complete
24-3	i_medico_platense		Instituto Medico Platense	38	22130	Internado	22132	Sala	Masc.	A. Blanca	89	Estimado	180	Estimado	Nivel Secundario	1	Si	No	Comunitario(sin nexo epidemiol√≥gico)	Complete	No	No	No	No	No	No	No	No	No	No	No	No	No	No	No	No	No	No	No	No	No	No	No	No	No	No	No		Complete
24-4	i_medico_platense		Instituto Medico Platense, La Plata, Buenos Aires	82	22130	Internado	22130	Sala	Masc.	A. Blanca	80	Estimado	169	Estimado	Nivel Primario	2	Si	No	Comunitario(sin nexo epidemiol√≥gico)	Complete	Si	No	No	No	No	No	No	No	No	No	No	No	No	No	No	No	No	No	No	No	No	No	No	No	No	No	No		Complete
24-6	i_medico_platense		Instituto Medico Platense, La Plata, Buenos Aires	88	22071	Internado	22071	Sala	Fem.	A. Blanca	60	Estimado	1.58		Nivel Primario	1	Si	No	Comunitario(sin nexo epidemiol√≥gico)	Complete	Si	No	No	No	No	No	No	No	No	No	No	No	No	No	No	No	No	No	No	No	No	No	No	No	No	No	No		Complete
24-7	i_medico_platense		Instituto Medico Platense, La Plata, Buenos Aires	89	22131	Internado	22131	Sala	Fem.	A. Blanca	68	Estimado	1.6	Estimado	Analfabeto	2	Si	No	Comunitario(sin nexo epidemiol√≥gico)	Complete	Si	No	Si	No	Si	No	No	No	No	No	No	No	No	No	No	No	No	No	No	No	No	No	No	No	No	No	No		Complete
24-10	i_medico_platense		Instituto Medico Platense, La Plata, Buenos Aires	48	22138	Internado	22138	Sala	Masc.	A. Blanca	80	Estimado	1.72	Estimado	Nivel Secundario	1	Si	No	Comunitario(sin nexo epidemiol√≥gico)	Complete	Si	No	No	No	No	No	No	No	No	No	No	No	No	No	No	No	No	No	No	No	No	No	No	No	No	No	No		Complete
24-11	i_medico_platense		Instituto Medico Platense, La Plata, Buenos Aires	68	22137	Internado	22137	Sala	Fem.	A. Blanca	70	Estimado	160	Estimado	Nivel Secundario	1	Si		Comunitario(sin nexo epidemiol√≥gico)	Complete	No	No	No	No	No	No	No	No	No	No	No	No	No	No	No	No	No	No	No	No	No	No	No	No	No	No	No		Complete
24-12	i_medico_platense		Instituto Medico Platense, La Plata, Buenos Aires	76	22140	Internado	22140	Sala	Fem.	A. Blanca	70	Estimado	165	Estimado	Analfabeto	1	Si	No	Comunitario(sin nexo epidemiol√≥gico)	Complete	Si	No	No	No	No	No	No	No	No	No	No	No	No	No	No	No	No	No	No	No	No	No	No	No	No	No	No		Complete
24-13	i_medico_platense		Instituto Medico Platense	77	22133	Internado	22133	Sala	Fem.	A. Blanca	80	Estimado	172	Estimado	Nivel Primario	1	Si	No	Comunitario(sin nexo epidemiol√≥gico)	Complete	Si	Si	Si	No	No	No	No	No	No	No	No	No	No	No	No	No	No	No	No	No	No	No	No	No	No	No	No		Complete
24-14	i_medico_platense		Instituto Medico Platense	84	22135	Internado	22135	Sala	Fem.	A. Blanca	70	Estimado	169	Estimado	Nivel Primario	30	Si	No	Comunitario(sin nexo epidemiol√≥gico)	Complete	No	No	No	No	No	No	Si	No	No	No	No	No	No	No	No	No	No	No	No	No	No	No	No	No	No	No	No		Complete
24-15	i_medico_platense		Instituto Medico Platense, La Plata, Buenos Aires	64	22148	Internado	22148	Sala	Masc.	A. Blanca	80	Estimado	160	Estimado	Nivel Secundario	4	Si	No	Comunitario(sin nexo epidemiol√≥gico)	Complete	Si	No	No	Si	No	No	No	No	No	No	No	No	No	No	No	No	No	No	No	No	No	No	No	No	No	No	No		Complete
24-16	i_medico_platense		Instituto Medico Platense, La Plata, Buenos Aires	44	22137	Internado	22135	Sala	Fem.	A. Blanca	89		168		Nivel Secundario	3	Si	No	Comunitario(sin nexo epidemiol√≥gico)	Complete	No	No	No	No	No	No	No	No	No	No	No	No	No	No	No	No	No	No	No	No	No	No	No	No	No	No	No		Complete
24-17	i_medico_platense		Instituto Medico Platense	92	22164	Internado	22133	Sala	Fem.	A. Blanca	95	Estimado	170	Estimado	Nivel Secundario	3	Si	No	Contacto estrecho	Complete	Si	Si	No	No	No	No	Si	No	No	No	No	No	No	No	No	No	No	No	No	No	No	No	No	No	No	No	No		Complete
24-18	i_medico_platense		Instituto Medico Platense	64	22137	Internado	22137	Sala	Fem.	A. Blanca	72	Estimado	171	Estimado	Nivel Primario	4	Si	No	Comunitario(sin nexo epidemiol√≥gico)	Complete	Si	No	No	No	No	No	No	No	No	No	No	No	No	No	No	No	No	No	No	No	No	No	No	No	No	No	No		Complete
24-19	i_medico_platense		Instituto Medico Platense	60	22092	Internado	22092	Sala	Masc.	A. Blanca	63	Estimado	148	Estimado	Nivel Primario	30	Si	No	Contacto estrecho	Complete	No	No	No	No	No	No	No	No	Si	No	No	No	No	No	No	No	No	No	No	No	No	No	No	No	No	No	No		Complete
24-21	i_medico_platense		Instituto Medico Platense	81	22149	Internado	22149	Sala	Masc.	A. Blanca	80	Estimado	178	Estimado	Nivel Secundario	2	Si	No	Comunitario(sin nexo epidemiol√≥gico)	Complete	Si	Si	No	No	No	Si	No	No	No	No	No	No	No	No	No	No	No	No	No	No	No	No	No	No	No	No	No		Complete
24-22	i_medico_platense		Instituto Medico Platense	52	22123	Internado	22123	Sala	Masc.	A. Blanca	89	Estimado	178	Estimado	Nivel Primario	2	Si	No	Comunitario(sin nexo epidemiol√≥gico)	Complete	Si	No	No	No	No	No	No	No	No	No	No	No	No	No	No	No	No	No	No	No	No	No	No	No	No	No	No		Complete
24-23	i_medico_platense		Instituto Medico Platense	72	22133	Internado	22133	Sala	Fem.	A. Blanca	70	Estimado	172	Estimado	Analfabeto	3	Si	No	Comunitario(sin nexo epidemiol√≥gico)	Complete	Si	No	Si	No	No	No	No	No	No	No	No	No	No	No	No	No	No	No	No	No	No	No	No	No	No	No	No		Complete
24-24	i_medico_platense		Instituto Medico Platense	72	22092	Internado	22092	Sala	Fem.	A. Blanca	70	Estimado	163	Estimado	Nivel Secundario	1	Si	No	Comunitario(sin nexo epidemiol√≥gico)	Complete	Si	No	No	No	No	Si	No	No	No	No	No	No	No	No	No	No	No	No	No	No	No	No	No	No	No	No	No		Complete
24-26	i_medico_platense		Instituto Medico Platense,La Plata, Buenos Aires	57	22160	Internado	22160	Sala	Masc.	A. Blanca	95	Estimado	1.7	Estimado	Nivel Secundario	1	Si	No	Comunitario(sin nexo epidemiol√≥gico)	Complete	No	No	No	No	No	No	No	No	No	No	No	No	No	No	No	No	No	No	No	No	No	No	No	No	No	No	No		Complete
24-27	i_medico_platense		Instituto Medico Platense, La Plata, Buenos Aires	50	22151	Internado	22151	Sala	Masc.	A. Blanca	70	Estimado	1.62	Estimado	Analfabeto	3	Si	No	Comunitario(sin nexo epidemiol√≥gico)	Complete	Si	No	No	No	No	No	No	No	No	No	No	No	No	No	No	No	No	No	No	No	No	No	No	No	No	Si	No		Complete
24-28	i_medico_platense		Instituto Medico Platense, La Plata, Buenos Aires	78	22150	Internado	22142	Terapia	Masc.	A. Blanca	82	Estimado	1.63	Estimado	Nivel Secundario	2	Si	No	Comunitario(sin nexo epidemiol√≥gico)	Complete	Si	No	No	No	No	Si	No	No	No	No	No	No	No	No	No	No	No	No	No	No	No	No	No	No	No	No	No		Complete
24-29	i_medico_platense		Instituto Medico Platense, La Plata, Buenos Aires	82	22151	Internado	22151	Sala	Masc.	A. Blanca	100	Estimado	1.7	Estimado	Analfabeto	3	Si	No	Comunitario(sin nexo epidemiol√≥gico)	Complete	Si	No	No	No	No	No	No	Si	No	No	No	No	No	Si	No	No	No	No	No	No	No	No	No	No	No	No	No		Complete
24-30	i_medico_platense		Instituto Medico Platense, La Plata, Buenos Aires	74	22153	Internado	22153	Sala	Fem.	A. Blanca	68		1.6	Estimado	Analfabeto	20	Si	No	Comunitario(sin nexo epidemiol√≥gico)	Complete	Si	No	No	No	No	No	Si	Si	No	No	No	No	No	No	No	No	No	No	No	No	No	No	No	No	No	No	No		Complete
24-31	i_medico_platense		Instituto Medico Platense, La Plata, Buenos Aires	77	22145	Internado	22145	Sala	Fem.	A. Blanca	58	Estimado	1.55	Estimado	Analfabeto	5	Si	No	Comunitario(sin nexo epidemiol√≥gico)	Complete	Si	No	No	No	No	No	No	No	No	No	No	No	No	No	No	No	No	No	No	No	No	No	No	No	No	No	No		Complete
24-32	i_medico_platense		Instituto Medico Platense,La Plata, Buenos Aires	74	22158	Internado	22158	Sala	Masc.	A. Blanca	87	Estimado	1.62	Estimado	Nivel Secundario	4	Si	No	Comunitario(sin nexo epidemiol√≥gico)	Complete	Si	No	No	No	No	No	No	No	No	No	No	No	No	No	No	No	No	No	No	No	No	No	No	No	No	No	No		Complete
24-33	i_medico_platense		Instituto Medico Platense, La Plata, Buenos Aires	88	22088	Internado	22088	Sala	Fem.	A. Blanca	60	Estimado	1.58	Estimado	Nivel Secundario	1	Si	No	Comunitario(sin nexo epidemiol√≥gico)	Complete	Si	No	No	No	No	No	No	No	No	No	No	No	No	No	No	No	No	No	No	No	No	No	No	No	No	No	No		Complete
24-36	i_medico_platense		Insituto Medico Platense, La Plata, Buenos Aires	48	22070	Ambulatorio		Sala	Masc.	A. Blanca	80	Estimado	1.6	Estimado	Nivel Terciario	4	Si	No	Personal salud	Complete	No	No	No	No	No	No	No	No	No	No	No	No	No	No	No	No	No	No	No	No	No	No	No	No	No	No	No		Complete
24-37	i_medico_platense		Instituto Medico Platense	62	22143	Internado	22143	Sala	Masc.	A. Blanca	90	Estimado	175	Estimado	Nivel Universitario completo	4	Si	No	Personal salud	Complete	Si	Si	No	Si	No	No	No	No	No	No	No	No	No	No	No	No	No	No	No	No	No	No	No	No	No	No	No		Complete
24-38	i_medico_platense		Instituto Medico Platense	60	22150	Internado	22150	Sala	Fem.	A. Blanca	73	Estimado	165	Estimado	Nivel Secundario	1	Si	No	Comunitario(sin nexo epidemiol√≥gico)	Complete	No	No	No	No	No	No	No	Si	No	No	No	No	No	No	No	No	No	No	No	No	No	No	No	No	No	No	No		Complete
24-39	i_medico_platense		Instituto Medico Platense	75	22141	Internado	22135	Sala	Masc.	A. Blanca	80	Estimado	179	Estimado	Nivel Secundario	2	Si	No	Comunitario(sin nexo epidemiol√≥gico)	Complete	Si	No	No	No	No	No	No	No	No	No	No	No	No	No	No	No	No	No	No	No	No	No	No	No	No	No	No		Complete
24-40	i_medico_platense		Instituto Medico Platense	63	22139	Internado	22139	Sala	Masc.	A. Blanca	105	Estimado	185	Estimado	Nivel Universitario completo	2	Si	No	Comunitario(sin nexo epidemiol√≥gico)	Complete	Si	No	No	No	No	No	No	No	No	No	No	No	No	No	No	No	No	No	No	No	No	No	No	No	No	No	No		Complete
24-41	i_medico_platense		Instituto Medico Platense	90	22141	Internado	22141	Sala	Fem.	A. Blanca	82	Estimado	173	Estimado	Nivel Primario	2	Si	No	Comunitario(sin nexo epidemiol√≥gico)	Complete	Si	No	No	No	No	No	No	No	No	No	No	No	Si	No	No	No	No	No	No	No	No	No	No	No	No	No	No		Complete
24-42	i_medico_platense		Instituto Medico Platense	69	22133	Internado	22133	Sala	Fem.	A. Blanca	77.3	Estimado	174	Estimado	Nivel Terciario	1	No	No	Comunitario(sin nexo epidemiol√≥gico)	Complete	Si	No	No	No	No	No	No	Si	No	No	No	No	No	No	No	No	No	Si	No	No	No	No	No	No	No	No	No		Complete
24-44	i_medico_platense		Instituto Medico Platense, La Plata, Buenos Aires	50	22145	Internado	22145	Sala	Masc.	A. Blanca	96	Estimado	1.7	Estimado	Nivel Universitario completo	2	Si	No	Personal salud	Complete	No	No	No	No	No	No	No	No	No	No	No	No	No	No	No	No	No	Si	No	No	No	No	No	No	No	No	No		Complete
24-46	i_medico_platense		Instituto Medico Platense,La Plata, Buenos Aires	81	22115	Internado	22115	Terapia	Masc.	A. Blanca	82	Estimado	1.68	Estimado	Nivel Secundario	2	Si	No	Comunitario(sin nexo epidemiol√≥gico)	Complete	Si	No	No	No	No	Si	No	No	No	No	No	No	No	No	No	No	No	No	No	No	No	No	No	No	No	No	No		Complete
24-48	i_medico_platense		Instituto Medico Platense	21	22150	Internado	22150	Sala	Fem.	A. Blanca	80.1	Estimado	173	Estimado	Nivel Secundario	2	Si	Si	Contacto estrecho	Complete	No	No	No	No	No	No	No	No	No	No	No	No	No	No	No	No	No	No	No	No	No	No	No	No	No	No	No		Complete
24-49	i_medico_platense		Instituto Medico Platense	42	22155	Internado	22157	Sala	Fem.	A. Blanca	85.3	Estimado	179	Estimado	Nivel Universitario completo	3	Si	No	Personal salud	Complete	No	No	No	No	No	No	No	No	No	No	No	No	No	No	No	No	Si	No	No	No	No	No	No	No	No	No	No		Complete
24-50	i_medico_platense		Instituto Medico Platense	76	22147	Internado	22147	Sala	Masc.	A. Blanca	93.6	Estimado	178	Estimado	Nivel Primario	2	Si	No	Comunitario(sin nexo epidemiol√≥gico)	Complete	Si	No	No	Si	Si	No	No	No	No	No	No	No	No	No	No	No	No	No	No	No	No	No	No	No	No	No	No		Complete
24-51	i_medico_platense		Instituto Medico Platense	78	22115	Internado	22115	Sala	Fem.	A. Blanca	75.6	Estimado	165	Estimado	Nivel Primario	2	Si	No	Contacto estrecho	Complete	Si	No	No	No	No	No	No	No	No	No	No	Si	No	No	No	No	No	No	No	No	No	No	No	No	No	No	No		Complete
24-53	i_medico_platense		Instituto Medico Platense, La Plata, Buenos Aires	75	22101	Internado	22101	Terapia	Masc.	A. Blanca	80	Estimado	1.75	Estimado	Nivel Secundario	1	Si	No	Comunitario(sin nexo epidemiol√≥gico)	Complete	Si	No	Si	Si	No	Si	No	No	No	No	No	No	Si	No	No	No	No	No	No	No	No	No	No	No	No	No	No		Complete
24-56	i_medico_platense		Instituto Medico Platense, La Plata, Buenos Aires	72	22102	Internado	22102	Sala	Masc.	A. Blanca	90	Estimado	1.7	Estimado	Nivel Primario	3	Si	No	Comunitario(sin nexo epidemiol√≥gico)	Complete	Si	Si	Si	No	No	No	No	Si	No	No	No	Si	No	No	No	No	No	No	Si	No	No	No	No	No	No	No	No		Complete
24-57	i_medico_platense		Instituto Medico Platense, La Plata, Buenos Aires	90	22079	Internado	22079	Sala	Fem.	A. Blanca	60	Estimado	1.6	Estimado	Nivel Primario	134	No	No	Comunitario(sin nexo epidemiol√≥gico)	Complete	Si	Si	No	No	No	No	No	No	No	No	No	No	No	No	No	No	No	No	No	No	No	No	No	No	No	Si	No		Complete
24-58	i_medico_platense		Instituto Medico Platense	49	22159	Internado	22159	Sala	Fem.	A. Blanca	93.6	Estimado	165	Estimado	Nivel Universitario incompleto	5	Si	No	Comunitario(sin nexo epidemiol√≥gico)	Complete	No	No	No	No	No	No	No	No	No	No	No	No	Si	No	No	No	No	No	No	No	No	No	No	No	No	No	No		Complete
24-60	i_medico_platense		Instituto Medico Platense,La Plata, Buenos Aires	59	22162	Internado	22141	Sala	Masc.	A. Blanca	89	Estimado	1.7	Estimado	Nivel Terciario	2	Si	No	Comunitario(sin nexo epidemiol√≥gico)	Complete	Si	No	No	No	No	No	No	No	No	No	No	No	No	No	No	No	No	No	No	No	No	No	No	No	No	No	No		Complete
24-62	i_medico_platense		Instituto Medico Platense	61	22119	Internado	22119	Sala	Masc.	A. Blanca	89.3	Estimado	172	Estimado	Nivel Universitario incompleto	4	Si	No	Comunitario(sin nexo epidemiol√≥gico)	Complete	Si	No	No	No	No	No	No	No	No	No	No	Si	No	No	No	Si	No	No	No	No	No	No	No	No	No	No	No		Complete
24-63	i_medico_platense		Instituto Medico Platense	61	22119	Internado	22119	Sala	Fem.	A. Blanca	80	Estimado	173	Estimado	Nivel Universitario incompleto	2	Si	No	Contacto estrecho	Complete	Si	No	No	No	No	No	No	No	No	No	No	No	No	No	No	No	No	No	Si	No	No	No	No	No	No	No	No		Complete
24-64	i_medico_platense		Instituto Medico Platense	71	22119	Internado	22105	Sala	Fem.	A. Blanca	73	Estimado	162	Estimado	Nivel Terciario	1	Si	No	Contacto estrecho	Complete	Si	No	No	No	No	No	No	No	No	No	No	No	Si	No	No	No	No	No	No	No	No	No	No	No	No	No	No		Complete
24-65	i_medico_platense		Instituto Medico Platense, La Plata, Buenos Aires	36	22124	Internado	22129	Sala	Masc.	A. Blanca	80	Estimado	1.65	Estimado	Nivel Secundario	5	Si	No	Contacto estrecho	Complete	No	No	No	No	No	No	No	No	No	No	No	No	No	No	No	No	No	No	No	No	No	No	No	No	No	No	No		Complete
24-68	i_medico_platense		Instituto Medico Platense	75	22107	Internado	22107	Sala	Fem.	A. Blanca	75	Estimado	162	Estimado	Nivel Secundario	1	Si	No	Comunitario(sin nexo epidemiol√≥gico)	Complete	No	Si	No	No	No	No	No	Si	No	No	No	No	No	No	No	No	No	No	No	No	No	No	No	No	No	No	No		Complete
24-72	i_medico_platense		Instituto Medico Platense	84	22157	Internado	22157	Sala	Masc.	A. Blanca	75.3	Estimado	172	Estimado	Nivel Secundario	30	Si	Si	Contacto estrecho	Complete	No	No	Si	Si	Si	No	No	Si	No	No	No	No	No	No	No	No	No	No	No	No	No	No	No	No	No	No	No		Complete
24-73	i_medico_platense		Instituto Medico Platense	81	22155	Internado	22155	Sala	Masc.	A. Blanca	92	Estimado	180	Estimado	Nivel Primario	2	Si	No	Comunitario(sin nexo epidemiol√≥gico)	Complete	Si	No	No	No	No	No	No	No	No	No	No	No	No	No	No	No	No	No	No	No	No	No	No	No	No	Si	No		Complete
24-74	i_medico_platense		Instituto Medico Platense	90	22092	Internado	22092	Sala	Fem.	A. Blanca	73.6	Estimado	178	Estimado	Nivel Primario	30	Si	No	Comunitario(sin nexo epidemiol√≥gico)	Complete	Si	No	Si	Si	No	No	Si	No	No	No	No	No	No	No	No	No	No	No	Si	No	No	No	No	No	No	No	No		Complete
24-76	i_medico_platense		Instituto Medico Platense	74	22074	Internado	22074	Sala	Fem.	A. Blanca	76.3	Estimado	158	Estimado	Nivel Secundario	2	Si	No	Comunitario(sin nexo epidemiol√≥gico)	Complete	No	No	No	No	No	No	No	No	No	No	No	No	No	No	No	No	No	No	No	No	No	No	No	No	No	No	No		Complete
24-77	i_medico_platense		Instituto Medico Platense	76	22161	Internado	22161	Sala	Masc.	A. Blanca	99	Estimado	170	Estimado	Nivel Primario	2	Si	No	Comunitario(sin nexo epidemiol√≥gico)	Complete	Si	Si	No	No	No	No	No	No	No	No	No	No	No	No	No	No	No	No	No	No	No	No	No	No	No	No	No		Complete
24-78	i_medico_platense		Instituto Medico Platense	77	22097	Internado	22097	Sala	Masc.	A. Blanca	78	Estimado	173	Estimado	Nivel Primario	2	Si	No	Comunitario(sin nexo epidemiol√≥gico)	Complete	Si	Si	No	Si	No	No	No	No	No	No	No	No	No	No	No	No	No	No	Si	No	No	No	No	No	No	No	No		Complete
24-79	i_medico_platense		Instituto Medico Platense	22	22026	Internado	22026	Sala	Masc.	A. Blanca	80	Estimado	173	Estimado	Nivel Secundario	2	Si	No	Comunitario(sin nexo epidemiol√≥gico)	Complete	No	No	No	No	No	No	No	No	No	No	No	No	No	No	No	No	No	No	No	No	No	No	No	No	No	No	No		Complete
24-80	i_medico_platense		Instituto Medico Platense	70	22069	Internado	22076	Sala	Fem.	A. Blanca	75.6	Estimado	160	Estimado	Nivel Primario	5	Si	No	Comunitario(sin nexo epidemiol√≥gico)	Complete	No	Si	No	Si	No	No	No	No	No	No	No	No	No	No	No	No	Si	No	No	No	No	No	No	No	No	No	No		Complete
24-81	i_medico_platense		Instituto Medico Platense	35	22092	Internado	22092	Sala	Masc.	A. Blanca	100	Estimado	183	Estimado	Nivel Secundario	5	Si	No	Personal salud	Complete	No	No	No	No	No	No	No	No	No	No	No	Si	No	No	No	No	No	Si	No	No	No	No	No	No	No	No	No		Complete
24-82	i_medico_platense		Instituto Medico Platense	44	22094	Internado	22094	Sala	Fem.	A. Blanca	65.3	Estimado	162	Estimado	Nivel Terciario	3	Si	No	Personal salud	Complete	No	No	No	No	No	No	No	No	No	No	No	No	No	No	No	No	No	Si	No	No	No	No	No	No	No	No	No		Complete
24-83	i_medico_platense		Instituto Medico Platense	57	21997	Internado	21997	Sala	Masc.	A. Blanca	83.3	Estimado	178	Estimado	Nivel Secundario	2	Si	Si	Caso importado	Complete	No	No	No	No	No	No	No	No	No	No	No	No	No	No	No	No	No	No	No	No	No	No	No	No	No	No	No		Complete
25-3	h_iturraspe		Iturraspe, Santa Fe Capital.	31	22139	Internado	22139	Sala	Masc.	A. Blanca	100	Estimado	185	Estimado	Nivel Secundario	6	No	No	Contacto estrecho	Complete	No	No	No	No	No	No	No	No	No	No	No	No	No	No	No	No	No	Si	No	No	Si	No	No	No	No	No	No		Complete
25-5	h_iturraspe		iturraspe, Santa Fe Capital	72	22141	Internado	22141	Sala	Masc.	A. Blanca	90	Estimado	178	Estimado	Nivel Universitario completo	2	No	No	Contacto estrecho	Complete	Si	No	No	Si	Si	No	No	No	No	No	No	No	No	No	No	No	No	No	Si	No	Si	No	No	No	No	No	No		Complete
25-8	h_iturraspe		Hospital Iturraspe - Santa Fe	62	22131	Internado	22131	Sala	Fem.	A. Blanca	65	Estimado	1.65	Estimado	Analfabeto	6	No	No	Contacto estrecho	Complete	Si	Si	No	No	No	No	No	No	No	No	No	Si	No	No	No	No	No	No	No	No	No	No	No	Si	No	No	No		Complete
25-33	h_iturraspe		Hospital Iturraspe	68	22143	Internado	22143	Sala	Fem.								Si		Contacto estrecho	Complete	Si	Si	No	No	No	No	No	No	No	No	No	No	No	No	No	No	No	No	No	No	No	No	No	No	No	No	No		Complete
25-34	h_iturraspe		Hospital Iturraspe	38	22148	Internado	22148	Sala	Masc.	A. Blanca							No	No		Unverified	No	No	No	No	No	No	No	No	No	No	No	No	No	No	No	No	No	No	Si	No	No	No	No	No	No	No	No		Complete
25-36	h_iturraspe		Hospital Iturraspe	44	22156	Internado	22156	Sala	Fem.								Si			Unverified	No	No	No	No	No	No	No	No	No	No	No	No	No	No	No	No	No	No	Si	No	No	No	No	No	No	No	No		Complete
25-37	h_iturraspe		Hospital Iturraspe	57	22158	Internado	22158	Sala	Fem.	A. Blanca							No	No		Unverified	Si	Si	No	No	No	No	No	No	No	No	No	Si	No	No	No	No	No	No	No	No	No	No	No	No	No	No	No		Complete
25-40	h_iturraspe		Iturraspe	54	22157	Internado	22159	Sala	Masc.	E. Otros	92.3	Estimado	180	Estimado	Nivel Secundario	1	Si		Comunitario(sin nexo epidemiol√≥gico)	Complete	No	No	No	No	No	No	No	Si	No	No	No	Si	No	No	No	No	No	No	Si	No	No	No	No	No	No	No	No		Complete
25-41	h_iturraspe		Iturraspe	37	22159	Internado	22159	Sala	Masc.	D. Pueblo originario	75	Estimado	170	Estimado	Nivel Secundario	2	No	No	Comunitario(sin nexo epidemiol√≥gico)	Complete	Si	Si	No	No	No	No	No	No	No	No	No	Si	No	No	No	No	No	No	No	No	No	No	No	No	No	No	No		Complete
25-43	h_iturraspe		Hospital Iturraspe	72	22161	Internado	22161	Sala	Masc.										Comunitario(sin nexo epidemiol√≥gico)	Complete	No	No	No	No	No	No	No	Si	No	No	No	No	No	No	No	No	No	Si	No	No	No	No	No	No	No	No	No		Complete
25-49	h_iturraspe		Hospital Iturraspe	51	22163	Internado	22163	Sala	Masc.	A. Blanca	100	Estimado	180	Estimado	Nivel Primario	3	No	No	Comunitario(sin nexo epidemiol√≥gico)	Complete	No	No	No	No	No	No	No	No	No	No	No	No	Si	No	No	No	No	No	No	No	No	No	No	No	No	No	No		Complete
25-52	h_iturraspe		Hospital Iturraspe	43	22164	Internado	22164	Sala	Fem.	A. Blanca	130	Estimado	165	Estimado	Nivel Secundario	3	No	No	Comunitario(sin nexo epidemiol√≥gico)	Complete	No	No	No	No	No	No	No	No	No	No	No	Si	No	No	No	No	No	Si	No	No	No	No	No	No	No	No	No		Complete
25-54	h_iturraspe		Hospital Iturraspe	42	22165	Internado	22165	Sala	Fem.	A. Blanca	80	Estimado	1.78	Estimado		2	Si	No	Comunitario(sin nexo epidemiol√≥gico)	Complete	No	No	No	No	No	No	No	No	No	No	No	No	No	No	No	No	No	No	No	No	No	No	No	No	Si	No	No		Complete
25-75	h_iturraspe		Hospital Iturraspe	28	22174	Internado	22174	Sala	Masc.	A. Blanca	90	Estimado	192	Estimado	Nivel Universitario completo	1	No	Si	Comunitario(sin nexo epidemiol√≥gico)	Complete	No	No	No	No	No	No	No	No	No	No	No	No	No	No	No	No	No	Si	No	No	No	No	No	No	No	No	No		Complete
26-1	h_fernandez		Fern√É¬°ndez (CABA)	37	22128	Ambulatorio		Sala	Fem.	A. Blanca						1	No	No	Contacto estrecho	Complete	No	No	No	No	No	No	No	No	No	No	No	No	No	No	No	No	No	No	No	No	No	No	No	No	No	No	No		Complete
26-2	h_fernandez		Fern√É¬°ndez (CABA)	28	22128	Internado	22128	Sala	Masc.	A. Blanca							Si	No	Contacto estrecho	Complete	No	No	No	No	No	No	No	No	No	No	No	No	No	No	No	No	No	No	No	No	No	No	No	No	No	No	No		Complete
26-3	h_fernandez		Fern√É¬°ndez (CABA)	40	22128	Internado	22128	Sala	Fem.							3	No	No	Contacto estrecho	Complete	Si	No	No	No	No	No	No	No	No	No	No	No	No	No	No	No	No	No	No	No	No	No	No	No	No	No	No		Complete
26-4	h_fernandez		Fern√É¬°ndez (CABA)	57	22128	Internado	22128	Sala	Masc.		78	Estimado	167	Estimado			No	No	Comunitario(sin nexo epidemiol√≥gico)	Complete	No	No	No	No	No	No	No	No	No	No	No	No	No	No	No	No	No	No	Si	No	No	No	No	No	No	No	No		Complete
26-5	h_fernandez		Fern√É¬°ndez (CABA)	23	22128	Internado	22128	Sala	Masc.	A. Blanca						2	No	No	Contacto estrecho	Complete	No	No	No	No	No	No	No	No	No	No	No	No	No	No	No	No	No	No	No	No	No	No	No	No	No	No	No		Complete
26-6	h_fernandez		Fern√É¬°ndez (CABA)	29	22128	Internado	22128	Sala	Fem.	A. Blanca	58	Estimado	160	Estimado		0	No	No	Comunitario(sin nexo epidemiol√≥gico)	Complete	No	No	No	No	No	No	No	No	No	No	No	No	No	No	No	No	No	No	No	No	No	No	No	No	No	No	No		Complete
26-7	h_fernandez		Fern√É¬°ndez (CABA)	55	22128	Internado	22128	Sala	Masc.	A. Blanca	75	Estimado	165	Estimado			No	No	Comunitario(sin nexo epidemiol√≥gico)	Complete	No	No	No	No	No	No	No	No	No	No	No	No	No	No	No	No	No	No	No	No	No	No	No	Si	Si	No	No		Complete
26-8	h_fernandez		Fern√É¬°ndez (CABA)	67	22128	Internado	22128	Sala	Fem.								Si	No	Contacto estrecho	Complete	Si	Si	No	No	No	No	No	No	No	No	No	Si	No	No	No	No	No	No	No	No	No	No	No	No	No	No	No		Complete
26-10	h_fernandez		Fern√É¬°ndez (CABA)	62	22159	Internado	22159	Sala	Masc.		82	Estimado	176	Estimado		3	No	No	Comunitario(sin nexo epidemiol√≥gico)	Complete	Si	No	No	No	No	No	No	No	No	No	No	No	No	No	No	No	No	No	No	No	No	No	No	No	No	No	No		Complete
26-11	h_fernandez		Fern√É¬°ndez (CABA)	51	22128	Internado	22128	Sala	Fem.	A. Blanca						2	No	No	Contacto estrecho	Complete	No	No	No	No	No	No	No	No	No	No	No	No	No	No	No	No	No	No	Si	No	No	No	No	No	No	No	No		Complete
26-12	h_fernandez		Fern√É¬°ndez (CABA)	54	22139	Internado	22139	Sala	Masc.	A. Blanca						1	No	No	Comunitario(sin nexo epidemiol√≥gico)	Complete	No	No	No	No	No	No	No	No	No	No	No	Si	No	No	No	No	No	No	No	No	No	No	No	No	No	No	No		Complete
26-13	h_fernandez		Fern√É¬°ndez (CABA)	78	22129	Internado	22129	Sala	Masc.	A. Blanca						0	Si	No	Contacto estrecho	Complete	No	No	No	No	No	No	No	No	No	No	No	No	No	No	No	No	No	No	No	No	No	No	No	No	No	No	No		Complete
26-15	h_fernandez		Fern√É¬°ndez (CABA)	43	22129	Internado	22129	Sala	Masc.		70	Estimado	172	Estimado			No	No	Contacto estrecho	Complete	No	No	No	No	No	No	No	No	No	No	No	No	No	No	No	No	No	No	No	No	No	No	No	No	No	No	No		Complete
26-16	h_fernandez		Fern√É¬°ndez (CABA)	56	22129	Internado	22129	Sala	Masc.		69	Estimado	165	Estimado		1	Si	No	Contacto estrecho	Complete	No	No	No	No	No	No	No	No	No	No	No	No	No	No	No	No	No	No	No	No	No	No	No	No	No	No	No		Complete
26-17	h_fernandez		Fern√É¬°ndez (CABA)	50	22129	Internado	22129	Sala	Masc.								No	No	Contacto estrecho	Complete	No	No	No	No	No	No	No	No	No	No	No	Si	No	No	No	No	No	No	No	No	No	No	No	No	No	No	No		Complete
26-18	h_fernandez		Fern√É¬°ndez (CABA)	37	22129	Internado	22129	Sala	Masc.	A. Blanca							Si	No	Personal salud	Complete	No	No	No	No	No	No	No	No	No	No	No	No	No	No	No	No	No	No	Si	No	No	No	No	No	No	No	No		Complete
26-19	h_fernandez		Fern√É¬°ndez (CABA)	48	22129	Internado	22129	Sala	Masc.							1	No	No	Contacto estrecho	Complete	No	No	No	No	No	No	No	No	No	No	No	No	No	No	No	No	No	No	No	No	No	No	No	No	No	No	No		Complete
26-20	h_fernandez		Fern√É¬°ndez (CABA)	48	22129	Internado	22129	Sala	Masc.							0	No	No	Comunitario(sin nexo epidemiol√≥gico)	Complete	No	No	No	No	No	No	No	No	No	No	No	No	No	No	No	No	No	Si	Si	Si	No	No	No	No	No	No	No		Complete
26-21	h_fernandez		Fern√É¬°ndez (CABA)	45	22129	Internado	22129	Sala	Masc.	A. Blanca	85	Estimado	170	Estimado			No	No	Contacto estrecho	Complete	No	No	No	No	No	No	No	No	No	No	No	No	No	No	No	No	No	No	No	No	No	No	No	No	No	No	No		Complete
26-22	h_fernandez		Fern√É¬°ndez (CABA)	56	22129	Internado	22129	Sala	Fem.	A. Blanca							No	No	Personal salud	Complete	No	No	No	No	No	No	No	No	No	No	No	No	No	No	No	No	No	No	No	No	No	No	No	No	No	No	No		Complete
26-23	h_fernandez		Fern√É¬°ndez (CABA)	48	22130	Internado	22130	Sala	Masc.							2	No	No	Contacto estrecho	Complete	No	No	No	No	No	No	No	No	No	No	No	No	No	No	No	No	No	No	No	No	Si	No	No	No	No	No	No		Complete
26-24	h_fernandez		Fern√É¬°ndez (CABA)	79	22130	Internado	22130	Sala	Fem.	A. Blanca	70	Estimado	165	Estimado		1	No	No	Comunitario(sin nexo epidemiol√≥gico)	Complete	Si	Si	No	No	No	Si	Si	No	No	No	No	No	No	No	No	No	No	No	No	No	No	No	No	No	No	No	No		Complete
26-25	h_fernandez		Fern√É¬°ndez (CABA)	42	22130	Internado	22130	Sala	Masc.	A. Blanca						1	Si	No	Comunitario(sin nexo epidemiol√≥gico)	Complete	No	No	No	No	No	No	No	No	No	No	No	No	No	No	No	No	No	No	No	No	No	No	No	No	No	No	No		Complete
26-26	h_fernandez		Fern√É¬°ndez (CABA)	82	22130	Internado	22130	Sala	Masc.	A. Blanca	82	Estimado	169	Estimado		3	Si	No	Comunitario(sin nexo epidemiol√≥gico)	Complete	No	No	No	Si	No	No	No	No	No	No	No	No	No	No	No	No	No	No	Si	No	No	No	No	No	No	No	No		Complete
26-28	h_fernandez		Fern√É¬°ndez (CABA)	63	22130	Internado	22130	Sala	Masc.	A. Blanca	72	Estimado	172	Estimado			Si	No	Contacto estrecho	Complete	Si	No	Si	Si	No	No	No	Si	No	No	No	No	No	No	No	No	No	Si	Si	No	No	No	No	No	No	No	No		Complete
26-29	h_fernandez		Fern√É¬°ndez (CABA)	63	22130	Internado	22130	Sala	Fem.	A. Blanca	68	Estimado	150	Estimado		2	No	No	Contacto estrecho	Complete	Si	Si	No	No	No	No	No	No	No	No	No	Si	No	No	No	No	Si	No	Si	No	No	No	No	No	No	No	No		Complete
26-30	h_fernandez		Fern√É¬°ndez (CABA)	83	22130	Internado	22130	Sala	Fem.	A. Blanca						1	Si	No	Contacto estrecho	Complete	No	No	No	No	No	No	No	No	Si	No	No	No	Si	No	No	No	Si	No	Si	No	No	No	No	No	No	No	No		Complete
26-31	h_fernandez		Fern√É¬°ndez (CABA)	80	22131	Internado	22131	Sala	Masc.	A. Blanca						1	Si	No	Comunitario(sin nexo epidemiol√≥gico)	Complete	Si	No	No	No	No	Si	No	No	No	No	No	No	No	No	No	No	No	No	Si	No	No	No	No	No	No	No	No		Complete
26-32	h_fernandez		Fern√É¬°ndez (CABA)	26	22131	Internado	22131	Sala	Fem.							2	No	No	Comunitario(sin nexo epidemiol√≥gico)	Complete	No	No	No	No	No	No	No	No	No	No	No	No	No	No	No	No	No	No	Si	No	No	No	No	Si	Si	Si	No		Complete
26-33	h_fernandez		Fern√É¬°ndez (CABA)	43	22131	Internado	22131	Sala	Fem.		79	Estimado	156	Estimado		3	No	No	Comunitario(sin nexo epidemiol√≥gico)	Complete	No	No	No	No	No	No	No	No	No	No	No	No	No	No	No	No	No	No	Si	No	No	No	No	No	No	No	No		Complete
26-34	h_fernandez		Fern√É¬°ndez (CABA)	57	22131	Internado	22131	Sala	Fem.								Si	No	Comunitario(sin nexo epidemiol√≥gico)	Complete	No	No	No	No	No	No	No	No	No	No	No	No	No	No	No	No	No	No	Si	No	No	No	No	No	No	No	No		Complete
26-35	h_fernandez		Fern√É¬°ndez (CABA)	33	22131	Internado	22131	Sala	Masc.	A. Blanca							No	No	Comunitario(sin nexo epidemiol√≥gico)	Complete	No	Si	No	No	No	No	No	No	No	No	No	No	No	No	No	No	No	No	No	No	No	No	No	No	No	No	No		Complete
26-36	h_fernandez		Fern√É¬°ndez (CABA)	58	22131	Internado	22131	Sala	Masc.	A. Blanca	115	Estimado	173	Estimado			No	No	Comunitario(sin nexo epidemiol√≥gico)	Complete	Si	No	No	No	No	No	No	No	No	No	No	Si	No	No	No	No	No	Si	Si	No	No	No	No	No	No	No	No		Complete
26-37	h_fernandez		Fern√É¬°ndez (CABA)	75	22131	Internado	22131	Sala	Masc.								No	No	Comunitario(sin nexo epidemiol√≥gico)	Complete	No	No	No	No	No	No	No	No	No	No	No	No	No	No	No	No	No	No	No	No	No	No	No	No	No	No	No		Complete
26-39	h_fernandez		Fern√É¬°ndez (CABA)	64	22132	Internado	22132	Sala	Masc.	A. Blanca	60	Estimado	164	Estimado		0	No	No	Contacto estrecho	Complete	No	No	No	No	No	No	No	Si	No	No	No	No	No	No	No	No	No	No	Si	No	No	No	No	No	No	No	No		Complete
26-40	h_fernandez		Fern√É¬°ndez (CABA)	43	22132	Internado	22132	Sala	Masc.	A. Blanca							No	No	Comunitario(sin nexo epidemiol√≥gico)	Complete	No	No	No	No	No	No	No	No	No	No	No	No	No	No	No	No	Si	No	No	No	No	No	No	No	No	No	No		Complete
26-41	h_fernandez		Fern√É¬°ndez (CABA)	76	22132	Internado	22132	Sala	Masc.							2	Si	No	Comunitario(sin nexo epidemiol√≥gico)	Complete	Si	No	No	No	No	No	No	No	No	No	No	Si	No	No	No	No	No	No	No	No	No	No	No	No	No	No	No		Complete
26-43	h_fernandez		Fern√É¬°ndez (CABA)	41	22133	Internado	22133	Sala	Masc.	A. Blanca	90	Estimado	175	Estimado		0	No	No	Contacto estrecho	Complete	No	No	No	No	No	No	No	No	No	No	No	Si	No	No	No	No	No	No	No	No	No	No	No	No	No	No	No		Complete
26-45	h_fernandez		Fern√É¬°ndez (CABA)	52	22133	Internado	22133	Sala	Masc.		93	Estimado	166	Estimado		1	Si	No	Contacto estrecho	Complete	No	Si	No	No	No	No	No	No	No	No	No	Si	No	No	No	No	No	Si	No	No	No	No	No	No	No	No	No		Complete
26-46	h_fernandez		Fern√É¬°ndez (CABA)	39	22133	Internado	22133	Sala	Masc.								No	No	Comunitario(sin nexo epidemiol√≥gico)	Complete	No	No	No	No	No	No	No	No	No	No	No	No	No	No	No	No	No	No	No	No	No	No	No	No	No	No	No		Complete
26-47	h_fernandez		Fern√É¬°ndez (CABA)	68	22133	Internado	22133	Sala	Masc.								No	No	Contacto estrecho	Complete	Si	No	No	No	No	No	No	No	No	No	No	No	No	No	No	No	No	No	Si	No	No	No	No	No	No	No	No		Complete
26-48	h_fernandez		Fern√É¬°ndez (CABA)	51	22133	Internado	22133	Guardia	Masc.	A. Blanca						2	No	No	Contacto estrecho	Complete	Si	No	No	No	No	No	No	No	No	No	No	No	No	No	No	No	No	No	No	No	No	No	No	No	No	No	No		Complete
26-49	h_fernandez		Fern√É¬°ndez (CABA)	40	22134	Internado	22134	Sala	Masc.	A. Blanca						1	Si	No	Personal salud	Complete	No	No	No	No	No	No	No	No	No	No	No	No	No	No	No	No	Si	No	No	No	No	No	No	No	No	No	No		Complete
26-50	h_fernandez		Fern√É¬°ndez (CABA)	48	22134	Internado	22134	Sala	Masc.	A. Blanca							Si	No	Contacto estrecho	Complete	No	No	No	No	No	No	No	No	No	No	No	No	No	No	No	No	No	Si	Si	No	No	No	No	No	No	No	No		Complete
26-51	h_fernandez		Fern√É¬°ndez (CABA)	60	22134	Internado	22134	Sala	Fem.	A. Blanca	70	Estimado	171	Estimado		2	No	No	Contacto estrecho	Complete	No	Si	No	No	No	No	No	No	No	No	No	No	No	No	No	No	No	Si	Si	No	No	No	No	No	No	Si	No		Complete
26-52	h_fernandez		Fern√É¬°ndez (CABA)	56	22134	Internado	22134	Sala	Masc.	A. Blanca	80	Estimado	172	Estimado		2	No	No	Contacto estrecho	Complete	No	No	No	No	No	No	No	No	No	No	No	No	No	No	No	No	No	No	No	No	No	No	No	No	No	No	No		Complete
26-53	h_fernandez		Fern√É¬°ndez (CABA)	80	22134	Internado	22134	Sala	Masc.	A. Blanca	66	Estimado	173	Estimado		0	Si	No	Contacto estrecho	Complete	Si	No	No	No	No	No	No	No	No	No	No	No	No	No	No	No	No	No	No	No	No	No	No	No	No	No	No		Complete
26-54	h_fernandez		Fern√É¬°ndez (CABA)	80	22134	Internado	22134	Sala	Masc.	A. Blanca						3	Si	No	Comunitario(sin nexo epidemiol√≥gico)	Complete	No	Si	No	Si	No	Si	No	No	No	No	No	No	No	No	No	No	No	No	No	No	No	No	No	No	No	Si	No		Complete
26-55	h_fernandez		Fern√É¬°ndez (CABA)	54	22134	Internado	22134	Sala	Fem.	A. Blanca	140	Estimado	166	Estimado		1	Si	No	Comunitario(sin nexo epidemiol√≥gico)	Complete	Si	No	No	No	No	No	No	No	No	No	No	Si	No	No	No	No	No	Si	Si	No	No	No	No	No	No	No	No		Complete
26-56	h_fernandez		Fern√É¬°ndez (CABA)	52	22134	Internado	22134	Sala	Fem.	A. Blanca						3	No	No	Contacto estrecho	Complete	Si	No	No	No	No	No	No	No	No	No	No	Si	No	No	No	No	No	No	No	No	No	No	No	No	No	No	No		Complete
26-57	h_fernandez		Fern√É¬°ndez (CABA)	67	22134	Internado	22134	Sala	Masc.							1	Si	No	Comunitario(sin nexo epidemiol√≥gico)	Complete	No	No	No	No	No	No	No	No	No	No	No	No	No	No	No	No	No	No	No	No	No	No	No	No	No	No	No		Complete
26-58	h_fernandez		Fern√É¬°ndez (CABA)	70	22134	Internado	22134	Sala	Masc.							1	Si	No	Comunitario(sin nexo epidemiol√≥gico)	Complete	Si	Si	No	Si	Si	No	No	Si	No	No	No	No	No	No	No	No	No	Si	Si	No	Si	No	No	No	No	No	No		Complete
27-1	s_agote		Sanatorio Agote	47	21977	Internado	21977	Sala	Masc.	A. Blanca							Si	No	Caso importado	Complete	No	No	No	No	No	No	No	No	No	No	No	No	No	No	No	No	No	No	No	No	No	No	No	No	No	No	No		Complete
28-1	h_penna		Penna	55	22009	Internado	22009	Sala	Masc.	A. Blanca	80	Estimado	185	Estimado	Nivel Primario	6	No	No	Contacto estrecho	Complete	No	No	No	No	No	No	No	No	No	No	No	Si	No	No	No	No	No	No	No	No	No	No	No	No	No	No	No		Complete
28-2	h_penna		J M Penna	48	22023	Internado	22023	Sala	Masc.	A. Blanca	98		165			6	No	No	Contacto estrecho	Complete	Si	Si	No	No	No	No	No	No	No	No	No	Si	No	No	No	No	No	No	No	No	No	No	No	No	No	No	No		Complete
28-3	h_penna		Htal J M Penna	40	22032	Internado	22032	Sala	Masc.	A. Blanca	90	Medido	180	Medido	Nivel Primario	0	No	No	Comunitario(sin nexo epidemiol√≥gico)	Complete	No	No	No	No	No	No	No	No	No	No	No	Si	No	No	No	No	No	Si	No	No	No	No	No	No	No	No	No		Complete
28-4	h_penna		J M Penna	40	22039	Internado	22039	Sala	Masc.	A. Blanca	70	Estimado	160	Estimado	Nivel Primario	1	No	No	Comunitario(sin nexo epidemiol√≥gico)	Complete	No	No	No	No	No	No	No	No	No	No	No	No	No	No	No	No	No	Si	Si	No	No	No	No	No	No	No	No		Complete
28-5	h_penna		H J M PENNA	59	22026	Internado	22004	Sala	Fem.	A. Blanca	100	Medido	160	Medido	Nivel Primario	6	No	No	Comunitario(sin nexo epidemiol√≥gico)	Complete	No	No	No	No	No	No	No	No	No	No	No	Si	No	No	No	No	No	No	No	No	No	No	No	No	No	No	No		Complete
28-6	h_penna		HTAL J M PENNA	40	22041	Internado	22041	Sala	Fem.	A. Blanca	75	Medido	155	Medido	Nivel Primario	2	No	No	Comunitario(sin nexo epidemiol√≥gico)	Complete	No	No	No	No	No	No	No	No	No	No	No	Si	No	No	No	No	No	No	No	No	No	No	No	No	No	No	No		Complete
28-7	h_penna		HTAL J M PENNA	54	22045	Internado	22045	Sala	Masc.	A. Blanca	80	Estimado	170	Estimado	Nivel Primario	2	No	No	Contacto estrecho	Complete	No	No	No	No	No	No	No	No	No	No	No	Si	No	No	No	No	No	No	No	No	No	No	No	No	No	No	No		Complete
28-8	h_penna		HTAL J M PENNA	35	22045	Internado	22045	Sala	Masc.	A. Blanca	80	Estimado	175	Estimado	Nivel Primario	2	No	No	Contacto estrecho	Complete	No	No	No	No	No	No	No	No	No	No	No	No	No	No	No	No	No	No	No	No	No	No	No	No	No	No	No		Complete
28-9	h_penna		HTAL J M PENNA	35	22045	Internado	22045	Sala	Fem.	A. Blanca	70	Estimado	170	Estimado	Nivel Secundario	0	No	No	Comunitario(sin nexo epidemiol√≥gico)	Complete	No	No	No	No	No	No	No	No	No	No	No	No	No	No	No	No	No	No	Si	No	No	No	No	No	No	No	No		Complete
28-10	h_penna		HTAL J M PENNA	35	22045	Internado	22045	Sala	Fem.	A. Blanca	60	Estimado	155	Estimado	Nivel Secundario	1	No	No	Comunitario(sin nexo epidemiol√≥gico)	Complete	No	No	No	No	No	No	No	No	No	No	No	No	No	No	No	No	No	No	No	No	No	No	No	No	No	No	No		Complete
28-11	h_penna		HTAL J M PENNA	44	22045	Internado	22045	Sala	Masc.	A. Blanca	70	Estimado	160	Estimado	Nivel Primario	0	No	No	Comunitario(sin nexo epidemiol√≥gico)	Complete	No	No	No	No	No	No	No	No	No	No	No	No	No	No	No	No	No	No	No	No	No	No	No	No	No	No	No		Complete
28-12	h_penna		HTAL J M PENNA	73	22167	Internado	22167	Sala	Fem.	A. Blanca	67	Medido	155	Medido	Nivel Primario	0	No	No	Comunitario(sin nexo epidemiol√≥gico)	Complete	No	Si	No	No	No	No	No	No	No	No	No	Si	No	No	No	No	No	No	No	No	No	No	No	Si	No	No	No		Complete
28-14	h_penna		J M Penna	43	22047	Internado	22047	Sala	Masc.	A. Blanca	72	Medido	170	Medido		4	No	No	Contacto estrecho	Complete	No	Si	No	No	No	No	No	No	No	No	No	No	No	No	No	No	No	No	No	No	No	No	No	No	No	No	No		Complete
28-15	h_penna		J M Penna	35	22049	Internado	22049	Sala	Masc.	A. Blanca	80	Estimado	175	Estimado	Nivel Secundario	0	No	No	Contacto estrecho	Complete	No	No	No	No	No	No	No	No	No	No	No	No	No	No	No	No	No	No	No	No	No	No	No	No	No	No	No		Complete
28-16	h_penna		J M Penna	68	22052	Internado	22052	Sala	Fem.	A. Blanca	50	Estimado	150	Estimado	Nivel Primario	2	No	No	Comunitario(sin nexo epidemiol√≥gico)	Complete	No	No	No	No	No	No	No	No	No	No	No	Si	No	No	No	No	No	No	No	No	No	No	No	No	No	No	No		Complete
28-18	h_penna		J M Penna	38	22047	Internado	22047	Sala	Fem.	A. Blanca	60	Estimado	160	Estimado	Nivel Secundario	3	No	No	Comunitario(sin nexo epidemiol√≥gico)	Complete	No	No	No	No	No	No	No	No	No	No	No	No	No	No	No	No	No	No	No	No	No	No	No	No	No	No	No		Complete
28-19	h_penna		J M Penna	63	22057	Internado	22057	Sala	Masc.	A. Blanca	75	Medido	150	Medido	Nivel Primario	0	No	No	Comunitario(sin nexo epidemiol√≥gico)	Complete	No	No	No	No	No	No	No	No	No	No	No	Si	No	No	No	No	No	Si	No	No	No	No	No	No	No	No	No		Complete
28-20	h_penna		HTAL J M PENNA	28	22171	Internado	22171	Sala	Masc.	A. Blanca	80	Medido	170	Medido	Nivel Secundario	2	No	No	Comunitario(sin nexo epidemiol√≥gico)	Complete	No	No	No	No	No	No	No	No	No	No	No	Si	No	No	No	No	No	No	No	No	No	No	No	No	No	No	No		Complete
28-21	h_penna		HTAL J M PENNA	36	22053	Internado	22053	Sala	Masc.	A. Blanca	70	Estimado	175	Estimado	Nivel Secundario	2	No	No	Contacto estrecho	Complete	No	No	No	No	No	No	No	No	No	No	No	No	No	No	No	No	No	No	No	No	No	No	No	No	No	No	No		Complete
28-23	h_penna		J M Penna	71	22060	Internado	22060	Sala	Masc.	A. Blanca	75	Medido	168	Medido	Nivel Primario	2	No	No	Comunitario(sin nexo epidemiol√≥gico)	Complete	No	No	No	No	No	No	No	Si	No	No	No	Si	No	No	No	No	No	No	Si	No	No	No	No	No	No	No	No		Complete
28-24	h_penna		J M Penna	51	22059	Internado	22059	Sala	Fem.	A. Blanca	72	Medido	150		Nivel Primario	10	No	No	Comunitario(sin nexo epidemiol√≥gico)	Complete	Si	No	No	No	No	No	No	No	No	No	No	No	No	No	No	No	No	No	No	No	No	No	No	No	No	No	No		Complete
28-25	h_penna		J M Penna	33	22060	Internado	22060	Sala	Fem.	A. Blanca	85	Medido	165	Medido	Nivel Primario	3	No	No	Comunitario(sin nexo epidemiol√≥gico)	Complete	No	No	No	No	No	No	No	No	No	No	No	Si	No	No	No	No	No	No	No	No	No	No	No	No	No	No	No		Complete
28-26	h_penna		J M Penna	54	22059	Internado	22059	Sala	Masc.	A. Blanca	60	Medido	158	Medido	Nivel Primario	10	No	No	Comunitario(sin nexo epidemiol√≥gico)	Complete	No	Si	No	No	No	No	No	No	No	No	No	No	No	No	No	No	No	No	No	No	No	No	No	No	No	No	No		Complete
28-28	h_penna		J M Penna	66	22051	Internado	22051	Sala	Fem.	A. Blanca	85	Medido	165	Medido	Nivel Secundario	3	No	No	Comunitario(sin nexo epidemiol√≥gico)	Complete	Si	No	No	No	No	No	No	No	No	No	No	Si	No	No	No	No	No	No	No	No	No	No	No	No	No	No	No		Complete
28-29	h_penna		J M Penna	70	22054	Internado	22054	Sala	Fem.	A. Blanca	70	Medido	165	Medido	Nivel Primario	6	No	No	Contacto estrecho	Complete	Si	Si	No	No	No	No	No	No	No	No	No	No	No	No	No	No	No	No	No	No	No	No	No	No	No	No	No		Complete
28-30	h_penna		J M Penna	20	22050	Internado	22050	Sala	Fem.	A. Blanca	75	Medido	158	Medido	Nivel Secundario	2	No	No	Comunitario(sin nexo epidemiol√≥gico)	Complete	No	No	No	No	No	No	No	No	No	No	No	Si	No	No	No	No	No	No	No	No	No	No	No	No	No	No	No		Complete
28-31	h_penna		J M Penna	45	22067	Internado	22097	Sala	Masc.	A. Blanca	70	Medido	165	Medido	Nivel Secundario	3	No	No	Comunitario(sin nexo epidemiol√≥gico)	Complete	Si	Si	No	No	No	No	No	No	No	No	No	No	No	No	No	No	Si	No	No	No	No	No	No	No	No	No	No		Complete
28-33	h_penna		J M Penna	24	22073	Internado	22073	Sala	Fem.	A. Blanca	58	Medido	153	Medido	Nivel Secundario	2	No	No	Contacto estrecho	Complete	No	No	No	No	No	No	No	No	No	No	No	No	No	No	No	No	No	No	No	No	No	No	No	No	No	No	No		Complete
28-34	h_penna		J M Penna	29	22065	Internado	22065	Sala	Masc.	A. Blanca	90	Medido	159	Medido	Nivel Terciario	3	No	No	Comunitario(sin nexo epidemiol√≥gico)	Complete	No	No	No	No	No	No	No	No	No	No	No	Si	No	No	No	No	No	No	No	No	No	No	No	No	No	No	No		Complete
28-35	h_penna		J M Penna	58	22064	Internado	22064	Sala	Masc.	A. Blanca	70	Medido	160	Medido	Nivel Primario	5	No	No	Comunitario(sin nexo epidemiol√≥gico)	Complete	No	No	No	No	No	No	No	No	No	No	No	No	No	No	No	No	No	No	No	No	No	No	No	No	No	No	No		Complete
28-36	h_penna		J M Penna	46	22063	Internado	22063	Sala	Masc.	A. Blanca	85	Medido	170	Medido	Nivel Secundario	0	No	No	Comunitario(sin nexo epidemiol√≥gico)	Complete	No	No	No	No	No	No	No	No	No	No	No	No	No	No	No	No	No	No	No	No	No	No	No	No	No	No	No		Complete
28-37	h_penna		Penna	60	22067	Internado	22067	Sala	Masc.	A. Blanca	80	Estimado	180		Nivel Secundario	4	No	No	Contacto estrecho	Complete	No	Si	No	No	No	No	No	Si	No	No	No	No	No	No	No	No	No	No	Si	No	No	No	No	No	No	No	No		Complete
28-38	h_penna		J M Penna	55	22063	Internado	22063	Sala	Masc.	A. Blanca	70	Estimado	170		Nivel Primario	1	No	No	Comunitario(sin nexo epidemiol√≥gico)	Complete	No	No	No	No	No	No	No	No	No	No	No	No	No	No	No	No	No	No	No	No	No	No	No	No	No	No	No		Complete
28-39	h_penna		Penna	44	22065	Internado	22065	Sala	Masc.	E. Otros	85	Estimado	172	Estimado	Nivel Secundario	2	No	No	Comunitario(sin nexo epidemiol√≥gico)	Complete	No	No	No	No	No	No	No	No	No	No	No	No	No	No	No	No	No	No	No	No	No	No	No	No	No	No	No		Complete
28-40	h_penna		Penna	56	22067	Internado	22067	Sala	Fem.	E. Otros	68	Estimado	155	Estimado	Nivel Secundario	5	No	No	Contacto estrecho	Complete	No	Si	No	No	No	No	No	No	No	No	No	Si	No	No	No	No	No	No	No	No	No	No	No	No	No	No	No		Complete
28-41	h_penna		Penna	43	22065	Internado	22065	Sala	Fem.	E. Otros	67	Estimado	155	Estimado		3	No	No	Contacto estrecho	Complete	No	No	No	No	No	No	No	No	No	No	No	Si	No	No	No	No	No	No	No	No	No	No	No	No	No	No	No		Complete
28-42	h_penna		Penna	59	22061	Internado	22061	Sala	Masc.	E. Otros	90	Estimado	165	Estimado	Nivel Primario	1	No	No	Comunitario(sin nexo epidemiol√≥gico)	Complete	No	No	No	No	No	No	No	No	No	No	No	Si	No	No	No	No	No	No	No	No	No	No	No	No	No	No	No		Complete
28-43	h_penna		J M Penna	28	22077	Internado	22077	Sala	Fem.	A. Blanca	70	Medido	160	Medido	Nivel Secundario	3	No	No	Contacto estrecho	Complete	No	No	No	No	No	No	No	No	No	No	No	No	No	No	No	No	No	No	No	No	No	No	No	No	No	No	No		Complete
28-44	h_penna		J M Penna	26	22067	Internado	22067	Sala	Fem.	A. Blanca	53	Medido	154	Medido	Nivel Secundario	2	No	No	Comunitario(sin nexo epidemiol√≥gico)	Complete	No	No	No	No	No	No	No	No	No	No	No	No	No	No	No	No	No	No	No	No	No	No	No	No	No	No	Si		Complete
28-46	h_penna		Penna	53	22122	Internado	22142	Sala	Masc.	A. Blanca	75	Estimado	180	Estimado	Nivel Primario		No	No	Contacto estrecho	Complete	Si	No	No	No	No	Si	Si	No	No	No	No	No	No	No	No	No	No	Si	No	No	No	No	No	No	No	No	No		Complete
28-47	h_penna		J M Penna	28	22079	Internado	22079	Sala	Fem.	E. Otros	85	Medido	165	Medido	Nivel Universitario completo	2	Si	No	Contacto estrecho	Complete	No	No	No	No	No	No	No	No	No	No	No	Si	No	No	No	No	No	No	No	No	No	No	No	No	No	No	No		Complete
29-2	h_lucero		Hospital Municipal de Agudos Dr Le√É¬≥nidas Lucero	27	21991	Internado	21991	Sala	Masc.								No	No	Caso importado	Complete	No	No	No	No	No	No	No	No	No	No	No	No	No	No	No	No	No	No	No	No	No	No	No	No	No	No	No		Complete
29-3	h_lucero		Hospital Municipal de Agudos Dr Le√É¬≥nidas Lucero	25	22007	Ambulatorio		Sala	Masc.								Si	No	Comunitario(sin nexo epidemiol√≥gico)	Complete	No	No	No	No	No	No	No	No	No	No	No	No	No	No	No	No	No	No	No	No	No	No	No	No	No	No	No		Complete
29-4	h_lucero		Hospital Municipal de Agudos Dr Le√É¬≥nidas Lucero	35	22020	Internado	22020	Sala	Masc.								No	No	Contacto estrecho	Complete	No	No	No	No	No	No	No	No	No	No	No	No	No	No	No	No	No	No	No	No	No	No	No	No	No	No	No		Complete
29-5	h_lucero		Hospital Municipal de Agudos Dr Le√É¬≥nidas Lucero	41	22048	Internado	22048	Sala	Masc.								Si	No	Contacto estrecho	Complete	No	No	No	No	No	No	No	No	No	No	No	No	No	No	No	No	No	No	No	No	No	No	No	No	No	No	No		Complete
29-6	h_lucero		Hospital Municipal de Agudos Dr Le√É¬≥nidas Lucero	59	22049	Internado	22049	Sala	Masc.								Si	No	Contacto estrecho	Complete	No	No	No	No	No	No	No	No	No	No	No	No	No	No	No	No	Si	No	Si	No	No	No	No	No	No	No	No		Complete
29-7	h_lucero		Hospital Municipal de Agudos Dr Le√É¬≥nidas Lucero	36	22049	Internado	22049	Sala	Masc.								Si	No	Contacto estrecho	Complete	No	No	No	No	No	No	No	No	No	No	No	No	No	No	No	No	No	No	Si	No	No	No	No	No	No	No	No		Complete
29-8	h_lucero		Hospital Municipal de Agudos Dr Le√É¬≥nidas Lucero	39	22051	Internado	22051	Sala	Fem.								Si	No	Contacto estrecho	Complete	No	No	No	No	No	No	No	No	No	No	No	No	No	No	No	No	Si	No	No	No	No	No	No	No	No	No	No		Complete
29-9	h_lucero		Hospital Municipal de Agudos Dr Le√É¬≥nidas Lucero	47	22078	Internado	22078	Sala	Masc.								Si	No	Comunitario(sin nexo epidemiol√≥gico)	Complete	No	No	No	No	No	No	No	No	No	No	No	Si	No	No	No	No	No	No	No	No	No	No	No	No	No	No	No		Complete
29-10	h_lucero		Hospital Municipal de Agudos Dr Le√É¬≥nidas Lucero	39	22084	Internado	22084	Sala	Fem.								No	No	Contacto estrecho	Complete	No	No	No	No	No	No	No	No	No	No	No	No	No	No	No	No	No	No	No	No	No	No	No	No	No	No	No		Complete
29-11	h_lucero		Hospital Municipal de Agudos Dr Le√É¬≥nidas Lucero	43	22089	Internado	22089	Sala	Masc.								No	No	Contacto estrecho	Complete	No	No	No	No	No	No	No	No	No	No	No	Si	No	No	No	No	No	No	No	No	No	No	No	No	No	No	No		Complete
29-12	h_lucero		Hospital Municipal de Agudos Dr Le√É¬≥nidas Lucero	43	22089	Ambulatorio		Sala	Masc.								Si	No	Comunitario(sin nexo epidemiol√≥gico)	Complete	No	No	No	No	No	No	No	No	No	No	No	Si	No	No	No	No	No	No	No	No	No	No	No	No	No	No	No		Complete
29-13	h_lucero		Hospital Municipal de Agudos Dr Le√É¬≥nidas Lucero	60	22094	Internado	22094	Sala	Masc.								Si	No	Contacto estrecho	Complete	No	No	No	No	No	No	No	No	No	No	No	No	No	No	No	No	No	No	No	No	No	No	No	No	No	No	No		Complete
29-14	h_lucero		Hospital Municipal de Agudos Dr Le√É¬≥nidas Lucero	81	22086	Ambulatorio		Sala	Masc.								Si	No	Comunitario(sin nexo epidemiol√≥gico)	Complete	Si	No	No	No	No	No	No	No	No	No	No	No	No	No	No	No	No	No	No	No	No	No	No	No	No	No	No		Complete
29-15	h_lucero		Hospital Municipal de Agudos Dr Le√É¬≥nidas Lucero	56	22098	Internado	22098	Sala	Fem.								No	No	Comunitario(sin nexo epidemiol√≥gico)	Complete	No	No	No	No	No	No	No	No	No	No	No	Si	No	No	No	No	No	No	No	No	No	No	No	No	No	No	No		Complete
29-16	h_lucero		Hospital Municipal de Agudos Dr Le√É¬≥nidas Lucero	40	22101	Internado	22101	Sala	Masc.								Si	No	Comunitario(sin nexo epidemiol√≥gico)	Complete	No	Si	No	No	No	No	No	No	No	No	No	Si	No	No	No	No	No	No	Si	No	No	No	No	Si	Si	No	No		Complete
29-17	h_lucero		Hospital Municipal de Agudos Dr Le√É¬≥nidas Lucero	89	22103	Internado	22103	Sala	Fem.								Si	No	Contacto estrecho	Complete	Si	Si	No	No	No	No	Si	No	No	No	No	No	No	No	No	No	No	No	No	No	No	No	No	No	No	No	No		Complete
29-18	h_lucero		Hospital Municipal de Agudos Dr Le√É¬≥nidas Lucero	72	22103	Internado	22103	Sala	Fem.								Si	No	Contacto estrecho	Complete	Si	Si	No	No	No	No	No	No	No	No	No	Si	No	No	No	No	No	No	No	No	No	No	No	No	No	No	No		Complete
29-20	h_lucero		Hospital Municipal de Agudos Dr Le√É¬≥nidas Lucero	89	22107	Internado	22107	Sala	Fem.								Si	No	Contacto estrecho	Complete	No	No	No	No	No	No	Si	No	No	No	No	No	No	No	No	No	No	No	No	No	No	No	No	No	No	No	No		Complete
29-22	h_lucero		Hospital Municipal de Agudos Dr Le√É¬≥nidas Lucero	64	22102	Ambulatorio		Sala	Fem.								Si	No	Comunitario(sin nexo epidemiol√≥gico)	Complete	No	No	No	No	No	No	No	No	No	No	No	Si	No	No	No	No	No	No	Si	No	No	No	No	No	No	No	No		Complete
32-40	h_vicente_lopez		Vicente Lopez	92	22104	Internado	22104	Guardia	Masc.	A. Blanca							Si	No	Comunitario(sin nexo epidemiol√≥gico)	Complete	No	No	No	No	No	No	Si	No	No	No	No	No	No	No	No	No	No	No	No	No	No	No	No	No	No	No	No		Complete
32-51	h_vicente_lopez		Vicente Lopez	75	22116	Internado	22116	Guardia	Masc.	A. Blanca									Comunitario(sin nexo epidemiol√≥gico)	Complete	Si	No	No	Si	No	No	No	No	No	No	No	No	No	No	No	No	No	No	Si	No	No	No	No	No	No	No	No		Complete
32-62	h_vicente_lopez		Vicente Lopez	32	22090	Internado	22090	Sala	Masc.	A. Blanca							No	No	Comunitario(sin nexo epidemiol√≥gico)	Complete	No	No	No	No	No	No	No	No	No	No	No	No	No	No	No	No	No	No	Si	No	No	No	No	No	No	No	No		Complete
33-1	h_muniz		Hospital Mu√É¬±iz CABA	66	22067	Internado	22067	Sala	Masc.	A. Blanca						3	No	No	Contacto estrecho	Complete	No	No	No	No	No	No	No	No	No	No	No	No	No	No	No	No	No	Si	No	No	No	No	No	No	No	No	No		Complete
33-2	h_muniz		Hospital Mu√É¬±iz CABA	67	22067	Internado	22067	Sala	Masc.	A. Blanca						4	No	No	Comunitario(sin nexo epidemiol√≥gico)	Complete	No	No	No	No	No	No	No	No	No	No	No	No	No	No	No	No	No	No	No	No	No	No	No	No	No	No	No		Complete
33-3	h_muniz		Hospital Mu√É¬±iz CABA	65	22067	Internado	22067	Sala	Fem.	A. Blanca						4	No	No	Contacto estrecho	Complete	Si	No	No	No	No	No	No	No	No	No	No	No	No	No	No	No	No	No	No	No	No	No	No	No	No	No	No		Complete
33-4	h_muniz		Hospital Mu√É¬±iz CABA	31	22067	Internado	22067	Sala	Masc.	A. Blanca						0	No	No	Comunitario(sin nexo epidemiol√≥gico)	Complete	No	No	No	No	No	No	No	No	No	No	No	No	No	No	No	No	Si	No	No	No	Si	No	No	No	No	No	No		Complete
33-5	h_muniz		Hospital Mu√É¬±iz CABA	64	22067	Internado	22067	Sala	Masc.	A. Blanca							No	No	Comunitario(sin nexo epidemiol√≥gico)	Complete	No	Si	No	No	No	No	No	No	No	No	No	No	No	No	No	No	No	No	No	No	No	No	No	No	No	No	No		Complete
33-7	h_muniz		Hospital Mu√É¬±iz, CABA	59	22068	Internado	22068	Sala	Fem.								No	No	Comunitario(sin nexo epidemiol√≥gico)	Complete	No	No	No	No	No	No	No	No	No	No	No	Si	No	No	No	No	No	No	No	Si	No	No	No	No	No	No	No	730	Complete
33-9	h_muniz		Hospital Mu√É¬±iz CABA	68	22068	Internado	22068	Sala	Masc.	A. Blanca						0	No	No	Contacto estrecho	Complete	Si	No	No	No	No	Si	No	No	No	No	No	No	No	No	No	No	No	No	Si	No	No	No	No	No	No	No	No		Complete
33-10	h_muniz		Hospital Mu√É¬±iz	46	22065	Internado	22068	Sala	Masc.	A. Blanca						4	No	No	Comunitario(sin nexo epidemiol√≥gico)	Complete	Si	Si	No	No	No	No	No	No	No	No	No	No	No	No	No	No	No	No	No	No	No	No	No	No	No	No	No		Complete
33-11	h_muniz		Hospital Mu√É¬±iz	45	22068	Internado	22068	Sala	Fem.	A. Blanca						8	No	No	Contacto estrecho	Complete	No	No	No	No	No	No	No	No	No	No	No	No	Si	No	No	No	Si	No	No	No	No	No	No	No	No	No	No		Complete
33-13	h_muniz		Hospital Mu√É¬±iz	51	22068	Internado	22068	Sala	Fem.	A. Blanca						2	No	No	Contacto estrecho	Complete	No	No	No	No	No	No	No	No	No	No	No	No	No	No	No	No	No	No	No	No	No	No	No	No	No	No	No		Complete
33-14	h_muniz		Hospital Mu√É¬±iz	84	22068	Internado	22068	Sala	Fem.	A. Blanca						2	No	No	Contacto estrecho	Complete	Si	No	No	No	No	No	No	No	No	No	No	No	Si	No	No	No	No	No	No	No	No	No	No	No	No	No	No		Complete
33-15	h_muniz		Hospital Mu√É¬±iz, CABA	72	22068	Internado	22068	Sala	Masc.										Comunitario(sin nexo epidemiol√≥gico)	Complete	No	Si	No	No	Si	No	No	No	No	Si	No	No	No	No	No	No	No	No	Si	No	Si	No	No	No	No	No	No		Complete
33-16	h_muniz		Hospital Mu√É¬±iz, CABA	55	22068	Internado	22068	Sala	Fem.							11			Comunitario(sin nexo epidemiol√≥gico)	Complete	Si	Si	No	No	No	No	No	No	No	No	No	No	No	No	No	No	No	No	No	No	No	No	No	No	No	No	No		Complete
33-17	h_muniz		Hospital Mu√É¬±iz	49	22069	Ambulatorio		Sala	Masc.							4	Si	No	Contacto estrecho	Complete	No	No	No	No	No	No	No	No	No	No	No	No	No	No	No	No	No	No	No	No	No	No	No	No	No	No	No		Complete
33-18	h_muniz		Hospital Mu√É¬±iz	33	22067	Ambulatorio		Sala	Fem.							2	Si	No	Contacto estrecho	Complete	No	No	No	No	No	No	No	No	No	No	No	No	No	No	No	No	No	No	No	No	No	No	No	No	No	No	No		Complete
33-19	h_muniz		Hospital Mu√É¬±iz	31	22067	Ambulatorio		Sala	Fem.							5	Si	No	Contacto estrecho	Complete	No	No	No	No	No	No	No	No	No	No	No	No	No	No	No	No	No	Si	No	No	No	No	No	No	No	No	No		Complete
33-21	h_muniz		Hospital Mu√É¬±iz	53	22068	Ambulatorio		Sala	Fem.							2	No	No	Comunitario(sin nexo epidemiol√≥gico)	Complete	No	No	No	No	No	No	No	No	No	No	No	No	No	No	No	No	No	No	No	Si	No	No	No	No	Si	No	No		Complete
33-22	h_muniz		Hospital Mu√É¬±iz	65	22069	Internado	22069	Sala	Fem.							1	Si	No	Comunitario(sin nexo epidemiol√≥gico)	Complete	Si	Si	No	No	No	No	No	No	No	No	No	No	No	No	No	No	No	No	No	No	No	No	No	No	No	No	No		Complete
33-23	h_muniz		Hospital Mu√É¬±iz	62	22069	Internado	22069	Sala	Masc.								Si	No	Conglomerado	Complete	Si	No	No	No	No	Si	No	No	No	No	No	No	No	No	No	No	No	No	No	No	No	No	No	No	No	No	No		Complete
33-24	h_muniz		Hospital Mu√É¬±iz, CABA	54	22070	Internado	22070	Sala	Masc.	A. Blanca							Si	No	Comunitario(sin nexo epidemiol√≥gico)	Complete	No	No	Si	No	No	No	No	No	No	No	No	No	No	No	No	No	No	No	No	No	No	No	No	No	No	No	No		Complete
33-25	h_muniz		Hospital Mu√É¬±iz, CABA	41	22070	Internado	22070	Sala	Masc.	A. Blanca						4	No	No	Comunitario(sin nexo epidemiol√≥gico)	Complete	No	No	No	No	No	No	No	No	No	No	No	No	No	No	No	No	No	No	No	No	No	No	No	No	No	No	No		Complete
33-26	h_muniz		Hospital Mu√É¬±iz, CABA	56	22070	Internado	22070	Sala	Fem.	A. Blanca							No	No	Comunitario(sin nexo epidemiol√≥gico)	Complete	No	Si	No	No	No	No	No	No	No	No	No	No	No	No	No	No	No	No	No	No	No	No	No	No	No	No	No		Complete
33-27	h_muniz		Hospital Mu√É¬±iz, CABA	30	22070	Internado	22070	Sala	Masc.	A. Blanca							No	No	Contacto estrecho	Complete	No	No	No	No	No	No	No	No	No	No	No	No	No	No	No	No	No	No	No	Si	No	No	No	No	No	No	No	64	Complete
33-28	h_muniz		Hospital Mu√É¬±iz, CABA	44	22070	Internado	22070	Sala	Masc.	A. Blanca							No	No	Comunitario(sin nexo epidemiol√≥gico)	Complete	No	No	No	No	No	No	No	No	No	No	No	No	No	No	No	No	No	No	No	No	No	No	No	No	No	No	No		Complete
33-29	h_muniz		Hospital Mu√É¬±iz, CABA	35	22070	Internado	22070	Terapia	Masc.	A. Blanca							No	No	Comunitario(sin nexo epidemiol√≥gico)	Complete	No	No	No	No	No	No	No	No	No	No	No	No	No	No	No	No	No	No	No	No	No	No	No	No	No	No	No		Complete
33-30	h_muniz		Hospital Mu√É¬±iz, CABA	53	22070	Internado	22070	Terapia	Masc.	A. Blanca							No	No	Comunitario(sin nexo epidemiol√≥gico)	Complete	Si	Si	No	No	No	No	No	No	No	No	No	No	No	No	No	No	No	No	No	No	No	No	No	No	No	No	No		Complete
33-31	h_muniz		Hospital Mu√É¬±iz, CABA	45	22071	Internado	22071	Sala	Masc.	A. Blanca							No	No	Comunitario(sin nexo epidemiol√≥gico)	Complete	No	No	No	No	No	No	No	No	No	No	No	No	No	No	No	No	No	No	No	No	No	No	No	No	No	No	No		Complete
33-32	h_muniz		Hospital Mu√É¬±iz, CABA	28	22071	Internado	22071	Sala	Fem.	A. Blanca					Nivel Terciario		Si	No	Personal salud	Complete	No	No	No	No	No	No	No	No	No	No	No	No	No	No	No	No	No	No	No	No	No	No	No	No	No	No	No		Complete
33-33	h_muniz		Hospital Mu√É¬±iz, CABA	23	22071	Internado	22071	Sala	Masc.	A. Blanca							Si	No	Comunitario(sin nexo epidemiol√≥gico)	Complete	No	No	No	No	No	No	No	No	No	No	No	No	No	No	No	No	No	No	No	No	No	No	No	No	No	No	No		Complete
33-34	h_muniz		Hospital Mu√É¬±iz, CABA	31	22071	Internado	22071	Sala	Fem.	A. Blanca							No	No	Comunitario(sin nexo epidemiol√≥gico)	Complete	No	No	No	No	No	No	No	No	No	No	No	No	No	No	No	No	No	No	No	Si	No	No	No	No	No	No	No	24	Complete
33-35	h_muniz		Hospital Mu√É¬±iz, CABA	61	22069	Internado	22071	Sala	Masc.	A. Blanca							No	No	Comunitario(sin nexo epidemiol√≥gico)	Complete	No	Si	No	No	No	No	No	No	No	No	No	No	No	No	No	No	Si	No	No	No	No	No	No	No	No	No	No		Complete
33-38	h_muniz		Hospital Mu√É¬±iz	24	22067	Internado	22071	Sala	Fem.	A. Blanca					Nivel Terciario		No	No	Personal salud	Complete	No	No	No	No	No	No	No	No	No	No	No	No	No	No	No	No	No	No	No	No	No	No	No	No	No	No	No		Complete
33-41	h_muniz		Hospital Mu√É¬±iz	24	22071	Internado	22071	Sala	Fem.								No	No	Contacto estrecho	Complete	No	No	No	No	No	No	No	No	No	No	No	No	No	No	No	No	No	No	No	No	No	No	No	No	No	No	No		Complete
33-42	h_muniz		Hospital Mu√É¬±iz	85	22071	Internado	22071	Sala	Fem.	A. Blanca							No	No	Contacto estrecho	Complete	No	No	Si	No	No	No	No	No	No	No	No	No	No	No	No	No	No	No	No	No	No	No	No	No	No	No	No		Complete
33-43	h_muniz		Hospital Mu√É¬±iz	54	22071	Internado	22071	Sala	Masc.	A. Blanca							No	No	Contacto estrecho	Complete	Si	No	No	No	No	No	No	No	No	No	No	No	No	No	No	No	No	No	No	No	No	No	No	No	No	No	No		Complete
33-44	h_muniz		Hospital Mu√É¬±iz	47	22072	Internado	22072	Sala	Fem.							2	No	No	Contacto estrecho	Complete	Si	No	No	No	No	Si	No	No	No	No	No	No	No	No	No	No	No	No	No	No	No	No	No	No	No	No	No		Complete
33-45	h_muniz		Hospital Mu√É¬±iz	53	22072	Internado	22072	Sala	Fem.							4	No	No	Comunitario(sin nexo epidemiol√≥gico)	Complete	No	No	No	No	No	No	No	No	No	No	No	No	No	No	No	No	Si	No	No	No	No	No	No	No	No	No	No		Complete
33-47	h_muniz		Hospital Mu√É¬±iz	32	22063	Internado	22063	Sala	Masc.								No	No	Contacto estrecho	Complete	No	No	No	No	No	No	No	No	No	No	No	No	No	No	No	No	No	Si	No	No	Si	No	No	No	No	No	No		Complete
33-48	h_muniz		Hospital Mu√É¬±iz	49	22062	Internado	22072	Sala	Fem.								No	No	Contacto estrecho	Complete	No	No	No	No	No	No	No	No	No	No	No	No	No	No	No	No	No	No	No	No	No	No	No	No	No	No	No		Complete
33-49	h_muniz		Hospital Mu√É¬±iz	75	22071	Ambulatorio		Sala	Fem.							1	No	No	Conglomerado	Complete	Si	No	No	No	No	No	No	Si	No	No	No	Si	No	No	No	No	No	No	Si	No	No	No	No	No	No	No	No		Complete
33-50	h_muniz		Hospital Mu√É¬±iz	51	22073	Internado	22073	Sala	Masc.								No	No	Comunitario(sin nexo epidemiol√≥gico)	Complete	No	No	No	No	No	No	No	No	No	Si	No	No	No	No	No	No	Si	No	No	No	No	No	No	No	No	No	No		Complete
33-51	h_muniz		Mu√É¬±iz	26	22071	Internado	22074	Sala	Fem.							2	No	No	Contacto estrecho	Complete	No	No	No	No	No	No	No	No	No	No	No	No	No	No	No	No	Si	No	No	No	No	No	No	No	No	No	No		Complete
33-52	h_muniz		Hospital Mu√É¬±iz	23	22073	Internado	22073	Sala	Masc.								No	No	Comunitario(sin nexo epidemiol√≥gico)	Complete	No	No	No	No	No	No	No	No	No	No	No	No	No	No	No	No	No	No	No	Si	No	No	No	No	No	No	No	605	Complete
33-53	h_muniz		Hospital Mu√É¬±iz	25	22073	Internado	22073	Sala	Masc.							0	No	No	Contacto estrecho	Complete	No	No	No	No	No	No	No	No	No	No	No	No	No	No	No	No	No	Si	No	Si	Si	No	No	No	No	No	No	243	Complete
33-54	h_muniz		Mu√É¬±iz	60	22074	Internado		Sala	Fem.							1	No	No	Comunitario(sin nexo epidemiol√≥gico)	Complete	No	No	No	No	No	No	No	No	No	No	No	No	No	No	No	No	No	No	Si	No	No	No	No	No	No	No	No		Complete
33-55	h_muniz		Hospital Mu√É¬±iz	33	22073	Internado	22073	Sala	Masc.							2	No	No	Contacto estrecho	Complete	No	No	No	No	No	No	No	No	No	No	No	No	No	No	No	No	No	No	No	Si	No	No	No	No	No	No	No	240	Complete
33-56	h_muniz		Hospital Mu√É¬±iz	82	22054	Internado	22054	Sala	Fem.								No	No	Conglomerado	Complete	Si	No	No	No	No	No	Si	No	No	No	No	No	No	No	No	No	No	No	No	No	No	No	No	No	No	No	No		Complete
33-59	h_muniz		Hospital Mu√É¬±iz	38	22063	Internado	22064	Sala	Masc.							3	No	No	Comunitario(sin nexo epidemiol√≥gico)	Complete	No	No	No	No	No	No	No	No	No	No	No	No	No	No	No	No	No	No	No	No	No	No	No	No	No	No	No		Complete
33-60	h_muniz		Mu√É¬±iz	38	22074	Internado	22074	Guardia	Fem.							5	No	No	Comunitario(sin nexo epidemiol√≥gico)	Complete	No	No	No	No	No	No	No	No	No	No	No	No	No	No	No	No	No	No	No	No	No	No	No	No	No	No	No		Complete
33-61	h_muniz		Hospital Mu√É¬±iz	43	22073	Internado	22073	Sala	Fem.							2	No	No	Comunitario(sin nexo epidemiol√≥gico)	Complete	No	Si	No	No	No	No	No	No	No	No	No	No	No	No	No	No	No	No	No	No	No	No	No	No	No	No	No		Complete
33-62	h_muniz		Hospital Mu√É¬±iz	29	22074	Internado	22074	Sala	Fem.								No	No	Comunitario(sin nexo epidemiol√≥gico)	Complete	No	No	No	No	No	No	No	No	No	Si	No	No	No	No	No	No	No	No	No	No	No	No	No	No	No	No	No		Complete
33-63	h_muniz		Mu√É¬±iz	55	22074	Internado	22074	Sala	Masc.								No	No	Comunitario(sin nexo epidemiol√≥gico)	Complete	No	No	No	No	No	No	No	No	No	No	No	No	No	No	No	No	No	No	No	No	No	No	No	No	No	No	No		Complete
33-65	h_muniz		Mu√É¬±iz	58	22074	Internado	22075	Sala	Masc.							3	No	No	Contacto estrecho	Complete	No	No	No	No	No	No	No	No	No	No	No	No	No	No	No	No	No	No	No	No	No	No	No	No	No	No	No		Complete
33-66	h_muniz		Mu√É¬±iz	47	22075	Internado	22075	Sala	Masc.								No	No	Contacto estrecho	Complete	No	No	No	No	No	No	No	No	No	No	No	No	No	No	No	No	No	No	No	No	No	No	No	No	No	No	No		Complete
33-68	h_muniz		Mu√É¬±iz	65	22071	Ambulatorio		Sala	Masc.								No		Contacto estrecho	Complete	Si	No	No	Si	No	No	No	Si	No	No	No	No	No	No	No	No	No	No	Si	No	No	No	No	No	No	No	No		Complete
33-69	h_muniz		Hospital Mu√É¬±iz, CABA	38	22075	Internado	22075	Sala	Fem.	A. Blanca							No	No	Comunitario(sin nexo epidemiol√≥gico)	Complete	No	No	No	No	No	No	No	No	No	No	No	No	No	No	No	No	No	No	No	No	No	No	No	No	No	No	No		Complete
33-71	h_muniz		Hospital Mu√É¬±iz, CABA	29	22077	Internado	22077	Sala	Masc.	A. Blanca							No	No	Comunitario(sin nexo epidemiol√≥gico)	Complete	No	No	No	No	No	No	No	No	No	No	No	No	No	No	No	No	No	No	No	No	No	No	No	No	No	No	No		Complete
33-72	h_muniz		Mu√É¬±iz	35	22075	Internado	22075	Sala	Masc.							4	No	No	Personal salud	Complete	No	No	No	No	No	No	No	No	No	Si	No	No	No	No	No	No	No	No	No	Si	No	No	No	No	No	No	No	469	Complete
33-77	h_muniz		Hospital Mu√É¬±iz, CABA	24	22075	Internado	22075	Sala	Fem.							1			Comunitario(sin nexo epidemiol√≥gico)	Complete	No	No	No	No	No	No	No	No	No	No	No	Si	No	No	No	No	No	No	No	No	No	No	No	No	No	No	No		Complete
33-79	h_muniz		Hospital Mu√É¬±iz, CABA	42	22075	Internado	22075	Sala	Fem.							3			Contacto estrecho	Complete	No	No	No	No	No	No	No	No	No	No	No	Si	No	No	No	No	No	No	No	No	No	No	No	No	No	No	No		Complete
33-81	h_muniz		Hospital Mu√É¬±iz, CABA	38	22075	Internado	22075	Sala	Fem.											Complete	No	No	No	No	No	No	No	No	No	No	No	No	No	No	No	No	No	No	No	No	No	No	No	No	No	No	No		Complete
33-82	h_muniz		Hospital Mu√É¬±iz, CABA	34	22076	Internado	22076	Sala	Fem.							4				Complete	No	No	No	No	No	No	No	No	No	No	No	Si	No	No	No	No	No	No	No	No	No	No	No	No	No	No	No		Complete
33-85	h_muniz		Hospital Mu√É¬±iz	83	22076	Internado	22076	Sala	Masc.	A. Blanca							No	No	Comunitario(sin nexo epidemiol√≥gico)	Complete	No	No	Si	No	No	No	No	No	No	No	No	No	No	No	No	No	No	No	No	No	No	No	No	No	No	No	No		Complete
33-86	h_muniz		Hospital Mu√É¬±iz	80	22075	Internado	22075	Sala	Fem.	A. Blanca							No	No	Comunitario(sin nexo epidemiol√≥gico)	Complete	Si	No	No	No	No	No	No	No	No	No	No	No	No	No	No	No	No	No	No	No	No	No	No	No	No	No	No		Complete
33-87	h_muniz		Hospital Mu√É¬±iz	35	22076	Internado	22076	Terapia	Fem.	A. Blanca							No	No	Comunitario(sin nexo epidemiol√≥gico)	Complete	No	No	No	No	No	No	No	No	No	No	No	No	No	No	No	No	No	No	No	No	No	No	No	No	No	No	No		Complete
33-88	h_muniz		Hospital Mu√É¬±iz	37	22076	Ambulatorio		Sala	Masc.	A. Blanca						2	No	No	Comunitario(sin nexo epidemiol√≥gico)	Complete	No	No	No	No	No	No	No	No	No	No	No	No	No	No	No	No	No	Si	No	No	No	No	No	No	No	No	No		Complete
33-89	h_muniz		Hospital Mu√É¬±iz	58	22073	Ambulatorio		Sala	Masc.	A. Blanca							No	No	Comunitario(sin nexo epidemiol√≥gico)	Complete	No	No	No	No	No	No	No	No	No	No	Si	No	No	No	No	No	No	No	Si	No	Si	No	No	No	No	No	No		Complete
33-90	h_muniz		Hospital Mu√É¬±iz	25	22064	Internado	22076	Sala	Masc.	A. Blanca						2	No	No	Comunitario(sin nexo epidemiol√≥gico)	Complete	No	No	No	No	No	No	No	No	No	No	No	No	No	No	No	No	No	No	No	No	No	No	No	No	No	No	No		Complete
33-91	h_muniz		Hospital Mu√É¬±iz	40	22168	Internado	22077	Sala	Masc.								No	No	Comunitario(sin nexo epidemiol√≥gico)	Complete	No	No	No	No	No	No	No	No	No	No	No	No	No	No	No	No	No	Si	No	No	No	No	No	No	No	No	No		Complete
33-92	h_muniz		Hospital Mu√É¬±iz	55	22077	Internado	22077	Terapia	Masc.								No	No	Comunitario(sin nexo epidemiol√≥gico)	Complete	No	Si	No	No	No	No	No	No	No	No	No	No	No	No	No	No	No	No	No	No	No	No	No	No	No	No	No		Complete
33-93	h_muniz		Hospital Mu√É¬±iz	52	22077	Internado	22077	Sala	Masc.								No	No	Comunitario(sin nexo epidemiol√≥gico)	Complete	No	Si	No	No	No	No	No	No	No	No	No	No	No	No	No	No	No	No	No	No	No	No	No	No	No	No	No		Complete
33-94	h_muniz		Hospital Mu√É¬±iz	57	22076	Internado	22076	Sala	Fem.	A. Blanca							No	No	Comunitario(sin nexo epidemiol√≥gico)	Complete	Si	No	No	No	No	No	No	No	Si	No	No	No	No	No	No	No	No	No	No	No	No	No	No	No	No	No	No		Complete
33-95	h_muniz		Hospital Mu√É¬±iz	55	22077	Internado	22077	Sala	Fem.							2	No	No	Contacto estrecho	Complete	No	No	No	No	No	No	No	No	Si	No	No	No	No	No	No	No	No	No	No	No	No	No	No	No	No	No	No		Complete
33-96	h_muniz		Hospital Mu√É¬±iz	74	22077	Internado	22077	Sala	Fem.							4	No	No	Contacto estrecho	Complete	Si	Si	No	No	No	No	No	No	No	No	No	No	No	No	No	No	No	No	No	No	No	No	No	No	No	No	No		Complete
33-97	h_muniz		Hospital Mu√É¬±iz	45	22075	Ambulatorio		Sala	Fem.	A. Blanca						7	Si	No	Comunitario(sin nexo epidemiol√≥gico)	Complete	No	No	No	No	No	No	No	No	No	No	No	Si	No	No	No	No	No	No	No	No	No	No	No	No	No	No	No		Complete
33-98	h_muniz		Hospital Mu√É¬±iz	38	22077	Internado	22077	Sala	Masc.							2	No	No	Comunitario(sin nexo epidemiol√≥gico)	Complete	No	No	No	No	No	No	No	No	No	No	No	Si	No	No	No	No	No	No	No	No	No	No	No	No	No	No	No		Complete
33-99	h_muniz		Hospital Mu√É¬±iz	49	22076	Internado	22076	Sala	Fem.	A. Blanca						1	No	No	Comunitario(sin nexo epidemiol√≥gico)	Complete	No	No	No	No	No	No	No	No	No	No	No	No	No	No	No	No	No	No	No	No	No	No	No	No	No	No	No		Complete
33-100	h_muniz		Mu√É¬±iz	55	22077	Internado	22077	Sala	Fem.								No	No	Contacto estrecho	Complete	No	No	No	No	No	No	No	No	No	No	No	No	No	No	No	No	No	No	No	No	No	No	No	No	No	No	No		Complete
33-102	h_muniz		Hospital Mu√É¬±iz, CABA	69	22077	Internado	22077	Sala	Masc.							4			Contacto estrecho	Complete	No	No	No	No	No	No	No	No	No	No	No	No	No	No	No	No	No	No	No	No	No	No	No	No	No	No	No		Complete
33-107	h_muniz		Hospital Mu√É¬±iz, CABA	58	22077	Internado	22077	Terapia	Masc.										Contacto estrecho	Complete	No	No	No	No	No	No	No	No	No	No	No	No	No	Si	No	No	No	No	No	No	No	No	No	No	No	No	No		Complete
33-108	h_muniz		Hospital Mu√É¬±iz, CABA	66	22078	Internado	22078	Sala	Fem.							5	No	No	Contacto estrecho	Complete	No	Si	No	No	No	No	No	No	No	No	No	No	No	No	No	No	No	No	Si	No	No	No	No	No	No	No	No		Complete
33-109	h_muniz		Hospital Mu√É¬±iz, CABA	56	22078	Internado	22078	Sala	Masc.								No	No	Contacto estrecho	Complete	No	Si	No	Si	No	No	No	No	No	No	No	No	No	No	No	No	No	No	No	No	No	No	No	No	No	No	No		Complete
33-121	h_muniz		Hospital Mu√É¬±iz	73	22078	Internado	22078	Terapia	Masc.								No	No	Comunitario(sin nexo epidemiol√≥gico)	Complete	No	No	No	No	No	No	No	No	No	No	No	No	No	No	No	No	No	No	No	No	No	No	No	No	No	No	No		Complete
33-125	h_muniz		Hospital Mu√É¬±iz	84	22078	Ambulatorio		Sala	Fem.	A. Blanca							No	No	Comunitario(sin nexo epidemiol√≥gico)	Complete	No	No	No	No	No	No	No	No	No	Si	No	No	No	No	No	No	No	No	No	No	No	No	No	No	No	No	No		Complete
33-126	h_muniz		Hospital Mu√É¬±iz	86	22077	Internado	22078	Sala	Masc.	D. Pueblo originario						3	No	No	Comunitario(sin nexo epidemiol√≥gico)	Complete	No	No	No	No	No	No	No	No	No	No	No	No	No	No	No	No	No	No	Si	No	No	No	No	No	No	No	No		Complete
33-127	h_muniz		Hospital Mu√É¬±iz	51	22078	Internado		Sala	Masc.	D. Pueblo originario							No	No	Comunitario(sin nexo epidemiol√≥gico)	Complete	Si	Si	No	No	No	No	No	No	No	No	No	No	No	No	No	No	No	No	No	No	No	No	No	No	No	No	No		Complete
33-128	h_muniz		Hospital Mu√É¬±iz	69	22079	Internado	22079	Sala	Masc.	A. Blanca							No	No	Comunitario(sin nexo epidemiol√≥gico)	Complete	No	No	No	No	No	No	No	Si	No	No	No	No	No	No	No	No	No	No	No	No	No	No	No	No	No	No	No		Complete
33-129	h_muniz		Hospital Mu√É¬±iz	31	22078	Internado		Sala	Masc.	A. Blanca						4	Si	No	Comunitario(sin nexo epidemiol√≥gico)	Complete	No	No	No	No	No	No	No	No	No	No	No	No	No	No	No	No	No	No	Si	No	No	No	No	No	No	No	No		Complete
33-130	h_muniz		Hospital Mu√É¬±iz	58	22077	Internado	22078	Terapia	Masc.	A. Blanca									Comunitario(sin nexo epidemiol√≥gico)	Complete	No	No	No	No	No	No	No	No	No	No	No	No	No	No	No	No	No	No	No	No	No	No	No	No	No	No	No		Complete
33-133	h_muniz		Hospital Mu√É¬±iz, CABA	63	22079	Internado	22079	Sala	Masc.	A. Blanca							No	No	Comunitario(sin nexo epidemiol√≥gico)	Complete	Si	Si	No	No	No	No	No	No	No	No	No	No	No	No	No	No	No	No	No	No	No	No	No	No	No	No	No		Complete
33-137	h_muniz		Hospital Mu√É¬±iz, CABA	82	22080	Internado	22080	Sala	Fem.	A. Blanca							Si	No	Contacto estrecho	Complete	No	No	No	No	No	No	Si	No	No	No	No	No	No	No	No	No	No	No	No	No	No	No	No	No	No	No	No		Complete
33-140	h_muniz		Hospital Mu√É¬±iz, CABA	60	22079	Internado	22079	Terapia	Masc.	D. Pueblo originario							No	No	Comunitario(sin nexo epidemiol√≥gico)	Complete	No	No	No	No	No	No	No	No	No	No	No	Si	No	No	No	No	No	No	No	No	No	No	No	No	No	No	No		Complete
33-142	h_muniz		Hospital Mu√É¬±iz, CABA	48	22080	Internado	22080	Sala	Fem.	A. Blanca							No	No	Comunitario(sin nexo epidemiol√≥gico)	Complete	Si	Si	No	No	No	No	No	No	No	No	No	Si	No	No	No	No	No	No	No	No	No	No	No	No	No	No	No		Complete
33-143	h_muniz		Hospital Mu√É¬±iz	46	22081	Internado		Sala	Masc.							5	No	No	Contacto estrecho	Complete	No	No	No	No	No	No	No	No	No	No	No	No	No	No	No	No	No	No	No	No	No	No	No	No	No	No	No		Complete
33-145	h_muniz		Hospital Mu√É¬±iz	63	22078	Internado	22081	Terapia	Masc.								No	No	Contacto estrecho	Complete	No	Si	No	No	No	No	No	No	No	No	No	No	No	No	No	No	No	No	No	No	No	No	No	No	No	No	No		Complete
33-146	h_muniz		Hospital Mu√É¬±iz	55	22080	Internado	22080	Sala	Fem.							1	No	No	Comunitario(sin nexo epidemiol√≥gico)	Complete	No	No	No	No	No	No	No	No	No	No	No	No	No	No	No	No	No	No	No	No	No	No	No	No	No	No	No		Complete
33-149	h_muniz		Hospital Mu√É¬±iz	38	22076	Ambulatorio		Sala	Fem.										Comunitario(sin nexo epidemiol√≥gico)	Complete	No	No	No	No	No	No	No	No	No	No	No	No	No	No	No	No	Si	No	No	No	No	No	No	No	No	No	No		Complete
33-158	h_muniz		Hospital Mu√É¬±iz, CABA	48	22083	Internado	22083	Sala	Fem.	A. Blanca							No	No	Contacto estrecho	Complete	No	Si	No	No	No	No	No	No	No	Si	No	No	No	No	No	No	No	No	No	No	No	No	No	No	No	No	No		Complete
33-159	h_muniz		Hospital Mu√É¬±iz, CABA	57	22083	Internado	22083	Sala	Masc.	A. Blanca							No	No	Comunitario(sin nexo epidemiol√≥gico)	Complete	No	No	No	No	No	No	No	No	No	No	No	No	No	No	No	No	No	No	No	No	No	No	No	No	No	No	No		Complete
33-160	h_muniz		Hospital Mu√É¬±iz	31	22083	Internado	22083	Sala	Fem.							0			Contacto estrecho	Complete	No	No	No	No	No	No	No	No	No	No	No	No	No	No	No	No	No	No	No	No	No	No	No	No	No	No	No		Complete
33-161	h_muniz		Hospital Mu√É¬±iz, CABA	35	22083	Internado	22083	Sala	Masc.	A. Blanca							No	No	Comunitario(sin nexo epidemiol√≥gico)	Complete	No	No	No	No	No	No	No	No	No	No	No	No	No	No	No	No	Si	No	No	No	No	No	No	No	No	No	No		Complete
33-162	h_muniz		Hospital Mu√É¬±iz	53	22083	Internado	22083	Sala	Fem.							1	No	No	Comunitario(sin nexo epidemiol√≥gico)	Complete	Si	No	No	No	No	No	No	No	No	No	No	No	No	No	No	No	No	No	No	No	No	No	No	No	No	No	No		Complete
33-163	h_muniz		Hospital Mu√É¬±iz	52	22083	Internado	22083	Sala	Masc.							4	No	No	Comunitario(sin nexo epidemiol√≥gico)	Complete	No	No	No	No	No	No	No	No	No	No	No	No	No	No	No	No	Si	No	No	No	No	No	No	No	No	No	No		Complete
33-164	h_muniz		Hospital Mu√É¬±iz	40	22083	Internado	22083	Sala	Masc.										Comunitario(sin nexo epidemiol√≥gico)	Complete	No	No	No	No	No	No	No	No	No	No	No	No	No	No	No	No	No	No	No	No	No	No	No	No	No	No	No		Complete
33-166	h_muniz		Hospital Mu√É¬±iz	71	22072	Internado	22072	Sala	Masc.							4	No	No	Contacto estrecho	Complete	Si	Si	No	No	No	No	No	No	No	No	No	Si	No	No	No	No	No	No	No	No	No	No	No	No	No	No	No		Complete
33-167	h_muniz		Hospital Mu√É¬±iz	45	22084	Internado	22084	Terapia	Masc.								No	No	Contacto estrecho	Complete	No	No	No	No	No	No	No	No	No	No	No	No	No	No	No	No	No	No	No	No	No	No	No	No	No	No	No		Complete
33-175	h_muniz		Hospital Mu√É¬±iz	42	22083	Internado		Sala	Fem.	D. Pueblo originario						2	No	No	Comunitario(sin nexo epidemiol√≥gico)	Complete	No	Si	No	No	No	No	No	No	No	No	No	No	No	No	No	No	No	No	No	No	No	No	No	No	No	No	No		Complete
33-176	h_muniz		Hospital Mu√É¬±iz	73	22083	Internado	22083	Sala	Masc.										Contacto estrecho	Complete	Si	No	No	Si	No	No	No	Si	No	No	No	No	No	No	No	No	No	No	Si	No	No	No	No	No	No	No	No		Complete
33-177	h_muniz		Hospital Mu√É¬±iz	41	22083	Internado	22083	Sala	Fem.							4			Contacto estrecho	Complete	No	Si	No	No	No	No	No	No	No	No	No	No	No	No	No	No	No	No	No	No	No	No	No	No	No	No	No		Complete
33-178	h_muniz		Hospital Mu√É¬±iz	65	22082	Internado	22084	Terapia	Masc.	A. Blanca							No	No	Comunitario(sin nexo epidemiol√≥gico)	Complete	Si	No	No	No	No	No	No	No	No	No	No	Si	No	No	No	No	No	No	No	No	No	No	No	No	No	No	No		Complete
33-179	h_muniz		Hospital Mu√É¬±iz	25	22084	Internado	22084	Sala	Masc.										Contacto estrecho	Complete	No	No	No	No	No	No	No	No	No	No	No	No	No	No	No	No	No	No	No	No	No	No	No	No	No	No	No		Complete
33-180	h_muniz		Hospital Mu√É¬±iz	50	22084	Internado	22084	Sala	Fem.							1	No	No	Contacto estrecho	Complete	No	No	No	No	No	No	No	No	No	No	No	No	No	No	No	No	Si	No	No	No	No	No	No	No	No	No	No		Complete
33-184	h_muniz		Hospital Mu√É¬±iz, CABA	51	22084	Internado	22084	Terapia	Fem.	A. Blanca							No	No	Comunitario(sin nexo epidemiol√≥gico)	Complete	No	No	Si	Si	No	No	No	No	No	No	No	Si	No	No	No	No	No	No	No	No	No	No	No	No	No	No	No		Complete
33-185	h_muniz		Hospital Mu√É¬±iz, CABA	27	22085	Internado	22085	Terapia	Masc.	A. Blanca							Si	No	Contacto estrecho	Complete	No	No	No	No	No	No	No	No	No	No	No	No	No	No	No	No	No	No	No	No	No	No	No	No	No	No	No		Complete
33-195	h_muniz		Hospital Mu√É¬±iz, CABA	70	22085	Internado	22085	Sala	Fem.	A. Blanca							No	No	Comunitario(sin nexo epidemiol√≥gico)	Complete	Si	No	No	No	No	No	No	No	No	No	No	Si	No	No	No	No	No	No	No	No	No	No	No	No	No	No	No		Complete
33-197	h_muniz		Hospital Mu√É¬±iz	66	22086	Internado	22086	Sala	Masc.										Contacto estrecho	Complete	Si	No	No	No	No	No	No	No	No	No	No	No	No	No	No	No	No	No	No	No	No	No	No	No	No	Si	No		Complete
33-198	h_muniz		Hospital Mu√É¬±iz	35	22086	Internado	22086	Sala	Masc.										Contacto estrecho	Complete	No	Si	No	No	No	No	No	No	No	No	No	No	No	No	No	No	No	No	Si	No	No	No	No	No	No	No	No		Complete
33-199	h_muniz		Hospital Mu√É¬±iz	46	22086	Internado	22086	Sala	Masc.							4			Comunitario(sin nexo epidemiol√≥gico)	Complete	Si	No	No	No	No	No	No	No	No	No	No	No	No	No	No	No	No	No	No	No	No	No	No	No	No	No	No		Complete
33-200	h_muniz		Hospital Mu√É¬±iz	45	22086	Internado	22086	Sala	Fem.								No	No	Comunitario(sin nexo epidemiol√≥gico)	Complete	No	No	No	No	No	No	No	No	No	No	No	No	No	No	No	No	No	No	No	No	No	No	No	No	No	No	No		Complete
33-201	h_muniz		Hospital Mu√É¬±iz	64	22085	Internado	22085	Terapia	Masc.	A. Blanca							No	No	Comunitario(sin nexo epidemiol√≥gico)	Complete	No	No	No	No	No	No	No	No	No	No	No	Si	No	No	No	No	No	No	No	No	No	No	No	No	No	No	No		Complete
33-202	h_muniz		Hospital Mu√É¬±iz	56	22086	Internado	22086	Sala	Masc.	A. Blanca							No	No	Comunitario(sin nexo epidemiol√≥gico)	Complete	No	Si	No	No	No	No	No	No	Si	No	No	No	No	No	No	No	No	No	No	No	No	No	No	No	No	No	No		Complete
33-203	h_muniz		Hospital Mu√É¬±iz, CABA	77	22084	Internado	22086	Terapia	Masc.	A. Blanca							No	No	Comunitario(sin nexo epidemiol√≥gico)	Complete	Si	No	No	No	No	No	No	No	No	No	No	No	No	No	No	No	No	No	No	No	No	No	No	No	No	No	No		Complete
33-204	h_muniz		Hospital Mu√É¬±iz, CABA	82	22087	Internado	22087	Sala	Masc.	A. Blanca							Si		Contacto estrecho	Complete	Si	Si	No	No	No	No	Si	No	No	No	No	No	No	No	No	No	No	No	No	No	No	No	No	No	No	No	No		Complete
33-205	h_muniz		Hospital Mu√É¬±iz, CABA	79	22087	Internado	22087	Terapia	Masc.	A. Blanca							No	No	Comunitario(sin nexo epidemiol√≥gico)	Complete	Si	Si	No	Si	No	No	No	No	No	No	No	No	No	No	No	No	No	No	No	No	No	No	No	No	No	No	No		Complete
33-206	h_muniz		Hospital Mu√É¬±iz, CABA	29	22087	Internado	22087	Sala	Fem.	D. Pueblo originario							No	No	Comunitario(sin nexo epidemiol√≥gico)	Complete	No	No	No	No	No	No	No	No	No	No	No	No	No	No	No	No	No	No	No	Si	No	No	No	No	No	No	No	156	Complete
33-207	h_muniz		Hospital Mu√É¬±iz	36	22088	Internado	22088	Sala	Fem.							3			Comunitario(sin nexo epidemiol√≥gico)	Complete	No	No	No	No	No	No	No	No	No	No	No	No	No	No	No	No	No	No	No	Si	No	No	No	No	No	No	No	3	Complete
33-209	h_muniz		Hospital Mu√É¬±iz	32	22088	Internado	22088	Sala	Fem.	C. Asi√°tica										Complete	No	No	No	No	No	No	No	No	No	No	No	No	No	No	No	No	No	No	No	No	No	No	No	No	No	No	No		Complete
33-210	h_muniz		Hospital Mu√É¬±iz	71	22087	Internado	22087	Sala	Fem.							2	No	No	Contacto estrecho	Complete	Si	No	No	No	No	No	No	No	No	No	No	No	No	No	No	No	No	No	No	No	No	No	No	No	No	No	No		Complete
33-211	h_muniz		Hospital Mu√É¬±iz	65	22087	Internado	22087	Sala	Masc.								No	No	Comunitario(sin nexo epidemiol√≥gico)	Complete	No	No	No	No	No	No	No	No	No	No	No	No	No	No	No	No	No	No	No	No	No	No	No	No	No	No	No		Complete
33-212	h_muniz		Hospital Mu√É¬±iz	44	22084	Internado	22087	Sala	Fem.							3	No	No	Comunitario(sin nexo epidemiol√≥gico)	Complete	No	No	No	No	No	No	No	No	No	No	No	No	No	No	No	No	Si	No	No	No	No	No	No	No	No	No	No		Complete
33-213	h_muniz		Hospital Mu√É¬±iz	52	22087	Internado	22087	Sala	Masc.								No	No	Comunitario(sin nexo epidemiol√≥gico)	Complete	No	No	No	No	No	No	No	No	No	No	No	No	No	No	No	No	No	No	No	No	No	No	No	No	No	No	No		Complete
33-214	h_muniz		Hospital Mu√É¬±iz	69	22088	Internado	22088	Sala	Fem.							3	No	No	Contacto estrecho	Complete	No	No	No	No	No	No	No	No	No	No	No	No	No	No	No	No	No	No	No	No	No	No	No	No	No	No	No		Complete
33-215	h_muniz		Hospital Mu√É¬±iz	59	22083	Internado	22088	Sala	Masc.							3	No	No	Comunitario(sin nexo epidemiol√≥gico)	Complete	No	No	No	No	No	No	No	No	No	No	No	No	No	No	No	No	No	No	No	No	No	No	No	No	No	No	No		Complete
33-216	h_muniz		Hospital Mu√É¬±iz	47	22078	Internado	22088	Sala	Fem.							2	No	No	Contacto estrecho	Complete	No	No	No	No	No	No	No	No	No	No	No	No	No	No	No	No	No	No	No	No	No	No	No	No	No	No	No		Complete
33-218	h_muniz		Hospital Mu√É¬±iz	55	22088	Internado	22088	Terapia	Masc.	D. Pueblo originario							No	No	Comunitario(sin nexo epidemiol√≥gico)	Complete	No	No	No	No	No	No	No	No	No	No	No	No	No	No	No	No	No	No	No	No	Si	No	No	No	No	No	No		Complete
33-219	h_muniz		Hospital Mu√É¬±iz	60	22088	Internado	22088	Sala	Fem.							2	No	No	Contacto estrecho	Complete	No	No	No	No	No	No	No	No	No	No	No	No	No	No	No	No	Si	No	No	No	No	No	No	No	No	No	No		Complete
33-220	h_muniz		Hospital Mu√É¬±iz	49	22089	Internado	22089	Sala	Masc.							0	Si	No	Comunitario(sin nexo epidemiol√≥gico)	Complete	No	No	No	No	No	No	No	No	No	No	No	No	No	No	No	No	No	No	No	No	No	No	No	No	No	No	No		Complete
33-221	h_muniz		Hospital Mu√É¬±iz	36	22088	Internado	22088	Sala	Fem.								No	No	Contacto estrecho	Complete	No	No	No	No	No	No	No	No	No	No	No	No	No	No	No	No	No	No	No	No	No	No	No	No	No	No	No		Complete
33-222	h_muniz		Hospital Mu√É¬±iz, CABA	63	22088	Internado	22088	Guardia	Fem.	A. Blanca							No	No	Comunitario(sin nexo epidemiol√≥gico)	Complete	Si	Si	No	No	No	No	No	No	No	No	No	No	No	No	No	No	No	No	Si	No	No	No	No	No	No	No	No		Complete
33-223	h_muniz		Hospital Mu√É¬±iz, CABA	25	22089	Internado	22089	Sala	Fem.	A. Blanca							Si	No	Comunitario(sin nexo epidemiol√≥gico)	Complete	No	No	No	No	No	No	No	No	No	No	No	No	No	No	No	No	No	No	No	No	No	No	No	No	No	No	Si		Complete
33-224	h_muniz		Hospital Mu√É¬±iz, CABA	49	22089	Internado	22089	Sala	Fem.	A. Blanca							No	No	Contacto estrecho	Complete	No	No	No	No	No	No	No	No	No	No	No	No	No	No	No	No	Si	No	No	No	No	No	No	No	No	No	No		Complete
33-225	h_muniz		Hospital Mu√É¬±iz, CABA	73	22089	Internado	22089	Sala	Fem.	A. Blanca							No	No	Contacto estrecho	Complete	Si	Si	No	No	No	No	No	No	No	No	No	No	No	No	No	No	No	No	No	No	No	No	No	No	No	No	No		Complete
33-226	h_muniz		Hospital Mu√É¬±iz, CABA	35	22089	Internado	22089	Sala	Fem.	A. Blanca							No	No	Comunitario(sin nexo epidemiol√≥gico)	Complete	No	No	No	No	No	No	No	No	No	No	No	No	No	No	No	No	No	No	No	No	No	No	No	No	No	No	No		Complete
33-227	h_muniz		Hospital Mu√É¬±iz	30	22089	Internado	22089	Sala	Masc.										Conglomerado	Complete	No	No	No	No	No	No	No	No	No	No	No	No	No	No	No	No	No	No	No	Si	No	No	No	No	No	No	No	374	Complete
33-228	h_muniz		Hospital Mu√É¬±iz	55	22090	Internado	22090	Sala	Masc.							2	No	No	Comunitario(sin nexo epidemiol√≥gico)	Complete	No	No	No	No	No	No	No	No	No	No	No	No	No	No	No	No	No	No	Si	No	No	No	No	Si	No	No	No		Complete
33-229	h_muniz		Hospital Mu√É¬±iz	76	22076	Internado	22076	Sala	Masc.							3	No	No	Contacto estrecho	Complete	Si	No	No	No	No	No	No	No	No	No	No	No	No	No	No	No	No	No	Si	No	No	No	No	No	No	No	No		Complete
33-230	h_muniz		Hospital Mu√É¬±iz	66	22082	Internado	22082	Sala	Masc.								No	No	Comunitario(sin nexo epidemiol√≥gico)	Complete	No	No	No	No	No	No	No	No	No	No	No	No	No	No	No	No	No	No	No	No	No	No	No	No	No	No	No		Complete
33-232	h_muniz		Mu√É¬±iz	48	22087	Internado	22090	Sala	Fem.								No	No	Contacto estrecho	Complete	No	No	No	No	No	No	No	No	No	No	No	No	No	No	No	No	No	No	No	No	No	No	No	No	No	No	No		Complete
33-237	h_muniz		Hospital Mu√É¬±iz	37	22095	Internado	22095	Sala	Masc.	D. Pueblo originario						5	No	No	Contacto estrecho	Complete	No	No	No	No	No	No	No	No	No	No	No	Si	No	No	No	No	No	No	Si	No	No	No	No	No	No	No	No		Complete
33-238	h_muniz		Hospital Mu√É¬±iz	25	22091	Internado	22091	Sala	Masc.							4	No	No	Contacto estrecho	Complete	No	No	No	No	No	No	No	No	No	No	No	Si	No	No	No	No	No	No	No	No	No	No	No	No	No	No	No		Complete
33-240	h_muniz		Hospital Mu√É¬±iz	56	22091	Internado	22091	Sala	Masc.							0	No	No	Comunitario(sin nexo epidemiol√≥gico)	Complete	No	No	No	No	No	No	No	No	No	No	No	No	No	No	No	No	No	Si	No	No	No	No	No	No	No	No	No		Complete
33-241	h_muniz		Hospital Mu√É¬±iz	63	22090	Internado	22090	Sala	Masc.	A. Blanca							No	No	Contacto estrecho	Complete	No	No	No	No	No	No	No	Si	No	No	No	No	No	No	No	No	No	No	No	No	No	No	No	No	Si	No	No		Complete
33-242	h_muniz		Hospital Mu√É¬±iz	30	22090	Internado	22090	Sala	Masc.	A. Blanca						1	No	No	Comunitario(sin nexo epidemiol√≥gico)	Complete	No	No	No	No	No	No	No	No	No	No	No	No	No	No	No	No	No	No	No	No	No	No	No	No	No	No	No		Complete
33-244	h_muniz		Hospital Mu√É¬±iz	61	22090	Internado	22091	Sala	Fem.							2	No	No	Contacto estrecho	Complete	Si	Si	No	No	No	No	No	No	No	Si	No	Si	No	No	No	No	No	No	No	No	No	No	No	No	No	No	No		Complete
33-245	h_muniz		Hospital Mu√É¬±iz	46	22090	Internado	22090	Sala	Fem.							1	No	No	Contacto estrecho	Complete	No	No	No	No	No	No	No	No	No	No	No	No	No	No	No	No	Si	No	No	No	No	No	No	No	No	No	No		Complete
33-246	h_muniz		Hospital Mu√É¬±iz	47	22090	Internado	22091	Sala	Masc.							6	No	No	Contacto estrecho	Complete	No	Si	No	No	No	No	No	No	No	No	No	No	No	No	No	No	No	No	No	No	No	No	No	No	No	No	No		Complete
33-247	h_muniz		Hospital Mu√É¬±iz	72	22090	Internado	22090	Sala	Fem.							0	Si	No	Comunitario(sin nexo epidemiol√≥gico)	Complete	Si	No	No	No	No	No	No	No	No	No	No	No	No	No	No	No	No	No	No	No	No	No	No	No	No	Si	No		Complete
33-248	h_muniz		Hospital Mu√É¬±iz	45	22085	Internado	22091	Sala	Masc.							4	No	No	Comunitario(sin nexo epidemiol√≥gico)	Complete	No	No	No	No	No	No	No	No	No	No	No	No	No	No	No	No	No	No	No	No	No	No	No	No	No	No	No		Complete
33-249	h_muniz		Hospital Mu√É¬±iz	39	22090	Internado	22090	Sala	Masc.								No	No	Comunitario(sin nexo epidemiol√≥gico)	Complete	No	No	No	No	No	No	No	No	No	No	No	No	No	No	No	No	Si	No	No	No	No	No	No	No	No	No	No		Complete
33-250	h_muniz		Hospital Mu√É¬±iz	37	22090	Internado	22090	Sala	Masc.							3	Si	No	Contacto estrecho	Complete	No	Si	No	No	No	No	No	No	No	No	No	No	No	No	No	No	No	No	No	No	No	No	No	No	No	No	No		Complete
33-251	h_muniz		Hospital Mu√É¬±iz	55	22090	Internado	22090	Sala	Fem.							7	No	No	Contacto estrecho	Complete	No	Si	No	No	No	No	No	No	No	No	No	No	No	No	No	No	No	No	No	No	No	No	No	No	No	No	No		Complete
33-252	h_muniz		Hospital Mu√É¬±iz, CABA	21	22090	Internado	22090	Sala	Fem.	A. Blanca						3	No	No	Comunitario(sin nexo epidemiol√≥gico)	Complete	No	No	No	No	No	No	No	No	No	No	No	No	No	No	No	No	Si	No	No	No	No	No	No	No	No	No	No		Complete
33-253	h_muniz		Hospital Mu√É¬±iz	77	22090	Internado	22090	Sala	Fem.							1			Contacto estrecho	Complete	Si	No	No	No	No	No	No	No	No	No	No	No	No	No	No	No	No	No	No	No	No	No	No	No	No	No	No		Complete
33-254	h_muniz		Hospital Mu√É¬±iz, CABA	38	22090	Internado	22090	Terapia	Masc.	A. Blanca								No	Comunitario(sin nexo epidemiol√≥gico)	Complete	No	No	No	No	No	No	No	No	No	No	No	Si	No	No	No	No	No	No	No	No	No	No	No	No	No	No	No		Complete
33-257	h_muniz		Hospital Mu√É¬±iz	36	22091	Internado	22091	Sala	Fem.								No	No	Contacto estrecho	Complete	No	No	No	No	No	No	No	No	No	No	No	No	No	No	No	No	No	No	No	No	No	No	No	No	No	No	No		Complete
33-258	h_muniz		Hospital Mu√É¬±iz	36	22092	Internado	22092	Sala	Masc.								No	No	Comunitario(sin nexo epidemiol√≥gico)	Complete	No	No	No	No	No	No	No	No	No	No	No	No	No	No	No	No	No	No	No	No	No	No	No	No	No	No	No		Complete
33-259	h_muniz		Hospital Mu√É¬±iz	47	22092	Internado	22092	Sala	Masc.								No	No	Comunitario(sin nexo epidemiol√≥gico)	Complete	No	No	No	No	No	No	No	No	No	No	No	No	No	No	No	No	No	No	No	No	No	No	No	No	No	No	No		Complete
33-260	h_muniz		Hospital Mu√É¬±iz	53	22091	Internado	22091	Sala	Masc.							4	No	No	Comunitario(sin nexo epidemiol√≥gico)	Complete	No	No	No	No	No	No	No	No	No	No	No	No	No	No	No	No	No	No	No	No	No	No	No	No	No	No	No		Complete
33-261	h_muniz		Hospital Mu√É¬±iz	50	22092	Internado	22092	Sala	Fem.							5	No	No	Contacto estrecho	Complete	No	No	No	No	No	No	No	No	No	No	No	No	No	No	No	No	No	No	No	No	No	No	No	No	No	No	No		Complete
33-262	h_muniz		Hospital Mu√É¬±iz	33	22093	Internado	22093	Sala	Masc.								No	No	Comunitario(sin nexo epidemiol√≥gico)	Complete	No	No	No	No	No	No	No	No	No	No	No	No	No	No	No	No	No	No	No	No	No	No	No	No	No	No	No		Complete
33-263	h_muniz		Hospital Mu√É¬±iz	60	22093	Internado	22093	Terapia	Fem.	A. Blanca							Si	No	Personal salud	Complete	No	No	No	Si	No	No	No	No	No	No	No	Si	No	No	No	No	No	No	No	No	No	No	No	No	No	No	No		Complete
33-264	h_muniz		Hospital Mu√É¬±iz	49	22087	Internado		Sala	Fem.	A. Blanca							Si	No	Comunitario(sin nexo epidemiol√≥gico)	Complete	No	No	No	No	No	No	No	No	No	No	No	No	No	No	No	No	No	No	No	No	No	No	No	No	No	No	No		Complete
33-265	h_muniz		Hospital Mu√É¬±iz	63	22091	Internado	22091	Sala	Fem.										Comunitario(sin nexo epidemiol√≥gico)	Complete	Si	No	No	No	No	No	No	No	No	No	No	No	No	No	No	No	No	No	No	No	No	No	No	No	No	No	No		Complete
33-266	h_muniz		Hospital Mu√É¬±iz	38	22092	Internado	22092	Sala	Masc.	A. Blanca							Si	No	Comunitario(sin nexo epidemiol√≥gico)	Complete	No	No	No	No	No	No	No	No	No	No	No	No	No	No	No	No	No	No	No	No	No	No	No	No	No	No	No		Complete
33-267	h_muniz		Hospital Mu√É¬±iz	31	22091	Internado	22091	Sala	Masc.										Contacto estrecho	Complete	No	No	No	No	No	No	No	No	No	No	No	No	No	No	No	No	Si	No	No	No	No	No	No	No	No	No	No		Complete
33-268	h_muniz		Hospital Mu√É¬±iz	35	22092	Internado	22092	Sala	Masc.	A. Blanca							No	No	Contacto estrecho	Complete	No	No	No	No	No	No	No	No	No	No	No	No	No	No	No	No	No	No	No	No	No	No	No	No	No	No	No		Complete
33-269	h_muniz		Hospital Mu√É¬±iz	42	22093	Internado	22093	Sala	Masc.							1			Comunitario(sin nexo epidemiol√≥gico)	Complete	No	Si	No	Si	No	No	No	No	No	No	No	No	No	No	No	No	No	No	Si	No	Si	No	No	No	No	No	No		Complete
33-270	h_muniz		Hospital Mu√É¬±iz	69	22091	Internado	22092	Sala	Fem.	A. Blanca						4	No	No	Contacto estrecho	Complete	Si	Si	No	No	No	No	No	No	No	No	No	No	No	No	No	No	No	No	No	No	No	No	No	No	No	No	No		Complete
33-271	h_muniz		Hospital Mu√É¬±iz	47	22093	Internado	22093	Sala	Masc.											Complete	No	No	No	No	No	No	No	No	No	No	No	No	No	No	No	No	No	No	No	Si	No	No	No	No	No	No	No	677	Complete
33-272	h_muniz		Hospital Mu√É¬±iz, CABA	76	22082	Internado	22091	Terapia	Masc.	A. Blanca							No	No	Comunitario(sin nexo epidemiol√≥gico)	Complete	Si	Si	No	No	No	Si	No	No	No	No	No	No	No	No	No	No	No	No	No	No	No	No	No	No	No	Si	No		Complete
33-276	h_muniz		Hospital Mu√É¬±iz, CABA	80	22090	Internado	22092	Sala	Masc.	A. Blanca							No	No	Comunitario(sin nexo epidemiol√≥gico)	Complete	No	No	Si	No	No	No	No	No	No	No	No	No	No	No	No	No	No	No	Si	No	No	No	No	No	No	No	No		Complete
33-277	h_muniz		Hospital Mu√É¬±iz	52	22092	Internado	22092	Sala	Fem.							3	No	No	Contacto estrecho	Complete	No	No	No	No	No	No	No	No	No	No	No	No	No	Si	No	No	No	No	No	No	No	No	No	No	No	No	No		Complete
33-278	h_muniz		Hospital Mu√É¬±iz	31	22094	Internado	22094	Sala	Fem.							2	No	No	Personal salud	Complete	No	Si	No	No	No	No	No	No	No	No	No	Si	No	No	No	No	No	No	No	No	No	No	No	No	No	No	No		Complete
33-280	h_muniz		Hospital Mu√É¬±iz, CABA	53	22092	Internado	22092	Sala	Masc.	A. Blanca							No	No	Comunitario(sin nexo epidemiol√≥gico)	Complete	No	No	Si	No	No	No	No	No	No	No	No	No	No	No	No	No	No	No	No	Si	No	No	No	No	No	No	No	166	Complete
33-281	h_muniz		Hospital Mu√É¬±iz, CABA	57	22092	Internado	22092	Sala	Masc.	A. Blanca							No	No	Contacto estrecho	Complete	No	No	No	No	No	No	No	No	No	No	No	No	No	No	No	No	No	No	No	Si	No	No	No	No	No	No	No		Complete
33-282	h_muniz		Hospital Mu√É¬±iz, CABA	50	22092	Internado	22092	Terapia	Masc.	D. Pueblo originario							No	No	Comunitario(sin nexo epidemiol√≥gico)	Complete	No	No	No	No	No	No	No	No	No	No	No	No	No	No	No	No	Si	No	No	No	No	No	No	No	No	No	No		Complete
33-283	h_muniz		Hospital Mu√É¬±iz, CABA	51	22094	Internado	22094	Sala	Masc.	A. Blanca							No	No	Comunitario(sin nexo epidemiol√≥gico)	Complete	No	No	No	No	No	No	No	No	No	No	No	No	No	No	No	No	No	No	No	Si	No	No	No	No	No	No	No		Complete
33-284	h_muniz		Hospital Mu√É¬±iz, CABA	41	22095	Internado	22095	Sala	Fem.	A. Blanca							No	No	Comunitario(sin nexo epidemiol√≥gico)	Complete	No	No	No	No	No	No	No	No	No	No	No	No	No	No	No	No	Si	Si	No	Si	No	No	No	No	No	No	No		Complete
33-286	h_muniz		Hospital Mu√É¬±iz	31	22187	Internado	22095	Sala	Masc.							3	No	No	Contacto estrecho	Complete	No	No	No	No	No	No	No	No	No	No	No	No	No	No	No	No	No	No	No	No	No	No	No	No	No	No	No		Complete
33-287	h_muniz		Hospital Mu√É¬±iz, CABA	56	22096	Internado	22096	Sala	Masc.	D. Pueblo originario							No	No	Comunitario(sin nexo epidemiol√≥gico)	Complete	No	No	No	No	No	No	No	No	No	No	No	No	No	No	No	No	Si	No	No	No	No	No	No	No	No	No	No		Complete
33-288	h_muniz		Hospital Mu√É¬±iz	23	22095	Internado	22095	Terapia	Fem.								No	No	Comunitario(sin nexo epidemiol√≥gico)	Complete	No	No	No	No	No	No	No	No	No	No	No	No	No	No	No	No	No	No	No	No	No	No	No	No	No	No	No		Complete
33-289	h_muniz		Hospital Mu√É¬±iz	80	22095	Internado	22095	Sala	Fem.							1	Si	No	Contacto estrecho	Complete	No	No	No	No	No	No	No	No	No	No	No	No	No	No	No	No	No	No	No	No	No	No	No	No	No	No	No		Complete
33-290	h_muniz		Hospital Mu√É¬±iz	37	22095	Internado	22095	Sala	Masc.							1	No	No	Comunitario(sin nexo epidemiol√≥gico)	Complete	No	No	No	No	No	No	No	No	No	No	No	No	No	No	No	No	No	No	No	No	No	No	No	No	No	No	No		Complete
33-291	h_muniz		Hospital Mu√É¬±iz	40	22096	Internado	22096	Sala	Masc.							0	No	No	Comunitario(sin nexo epidemiol√≥gico)	Complete	No	No	No	No	No	No	No	No	No	No	No	No	No	No	No	No	No	No	No	No	No	No	No	No	No	No	No		Complete
33-292	h_muniz		Hospital Mu√É¬±iz	41	22095	Internado	22095	Sala	Fem.	A. Blanca						5	No	No	Contacto estrecho	Complete	Si	No	No	No	No	No	No	No	No	No	No	No	No	No	No	No	Si	No	No	No	No	No	No	No	No	No	No		Complete
33-293	h_muniz		Hospital Mu√É¬±iz	21	22095	Internado	22095	Sala	Fem.	A. Blanca							No	No	Contacto estrecho	Complete	No	Si	No	No	No	No	No	No	No	No	No	No	No	No	No	No	No	No	No	No	No	No	No	No	No	No	No		Complete
33-294	h_muniz		Hospital Mu√É¬±iz, CABA	53	22095	Internado	22095	Terapia	Masc.	D. Pueblo originario							No	No	Comunitario(sin nexo epidemiol√≥gico)	Complete	No	No	No	No	No	No	No	No	No	No	No	Si	No	No	No	No	No	No	No	No	No	No	No	No	No	No	No		Complete
33-295	h_muniz		Hospital Mu√É¬±iz, CABA	64	22096	Internado	22096	Terapia	Masc.	A. Blanca							No	No	Comunitario(sin nexo epidemiol√≥gico)	Complete	Si	No	No	No	No	No	No	No	No	No	No	No	No	No	No	No	No	Si	No	No	No	No	No	No	No	No	No		Complete
33-296	h_muniz		Hospital Mu√É¬±iz	42	22095	Internado	22095	Sala	Masc.								No	No	Comunitario(sin nexo epidemiol√≥gico)	Complete	No	No	No	No	No	No	No	No	No	No	No	No	No	No	No	No	Si	No	No	No	No	No	No	No	No	No	No		Complete
33-297	h_muniz		Hospital Mu√É¬±iz	38	22095	Internado	22095	Sala	Masc.								No	No	Contacto estrecho	Complete	No	Si	No	No	No	No	No	No	No	No	No	No	No	No	No	No	No	No	No	No	No	No	No	No	No	No	No		Complete
33-298	h_muniz		Hospital Mu√É¬±iz	41	22095	Internado	22095	Sala	Masc.							6	No	No	Comunitario(sin nexo epidemiol√≥gico)	Complete	No	No	No	No	No	No	No	No	No	No	No	No	No	No	No	No	No	No	No	No	No	No	No	No	No	No	No		Complete
33-300	h_muniz		Hospital Mu√É¬±iz	50	22096	Internado	22096	Sala	Fem.										Contacto estrecho	Complete	No	No	No	No	No	No	No	No	No	No	No	No	No	No	No	No	No	No	No	No	No	No	No	No	No	No	No		Complete
33-301	h_muniz		Hospital Mu√É¬±iz	69	22096	Internado	22096	Sala	Fem.										Contacto estrecho	Complete	No	No	No	No	No	No	No	No	No	No	No	No	No	No	No	No	No	No	No	No	No	No	No	No	No	No	No		Complete
[truncated: 254 more columns]
